# Supplementary material for: Synthesis of Organic Ligands via Reactions of 4-Benzoyl-5-phenylamino-2,3-dihydrothiophene-2,3-dione with N-Nucleophiles
Source: Hindawi journal article supplement (doi:10.1155/2020/5945796), 2020-07-08
Supplement: f1 [file 5945796.f1.doc]

**Synthesis of organic ligands *via* reactions of 4-benzoyl-5-phenylamino-2,3-dihydrothiophene-2,3-dione with *N*-nucleophiles**

Hassan Kabirifard*, Pardis Hafez Taghva, Hossein Teimouri, Niloofar Koosheshi, Parastoo Javadpour, Hanieh Bagherinejad, Soheila Seyfi, Maryam Hossein Roodbari and elaheh Golabian

*Department of Chemistry, North Tehran Branch, Islamic Azad University, Tehran, Iran*

****Corresponding author:*** *Email:* [*h_kabirifard@iau-tnb.ac.ir*](mailto:h_kabirifard@iau-tnb.ac.ir)

**Table of contents:**

| Sample | IR, 1H NMR, 13C NMR and MS |
| --- | --- |
| **2a** | 2-4 |
| **2b** | 5-7 |
| **2c** | 8-10 |
| **3a** | 11-13 |
| **3b** | 14-16 |
| **3c** | 17-19 |
| **3d** | 20-22 |
| **3e** | 23-25 |
| **4a** | 26-28 |
| **4b** | 29-31 |
| **4c** | 32-34 |
| **5** | 35-37 |
| **6** | 38-40 |
| **7** | 41-43 |
| **8** | 44-46 |

**(2*E*)-*N*-2-Pyridyl-2-hydroxy-4-oxo-4-phenyl-3-(*N*-phenylthiocarbamoyl)-2-butenamide (2a)**


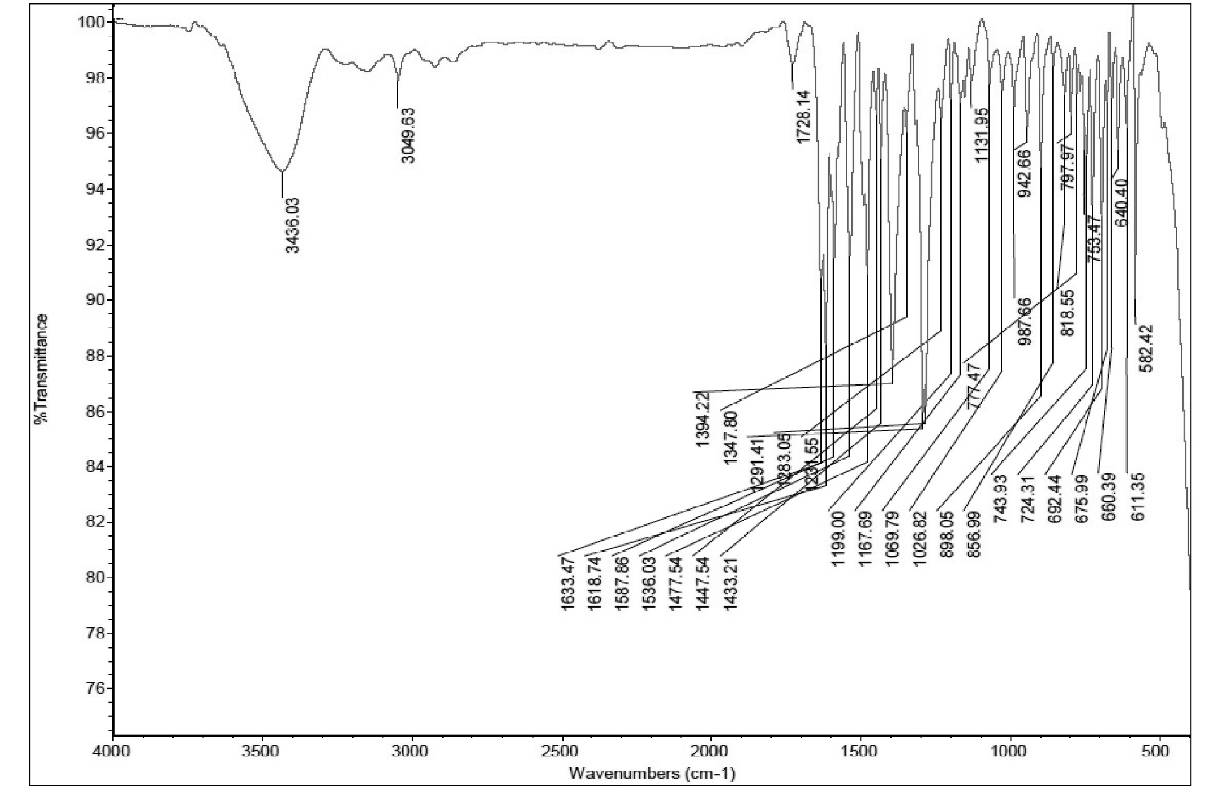


**
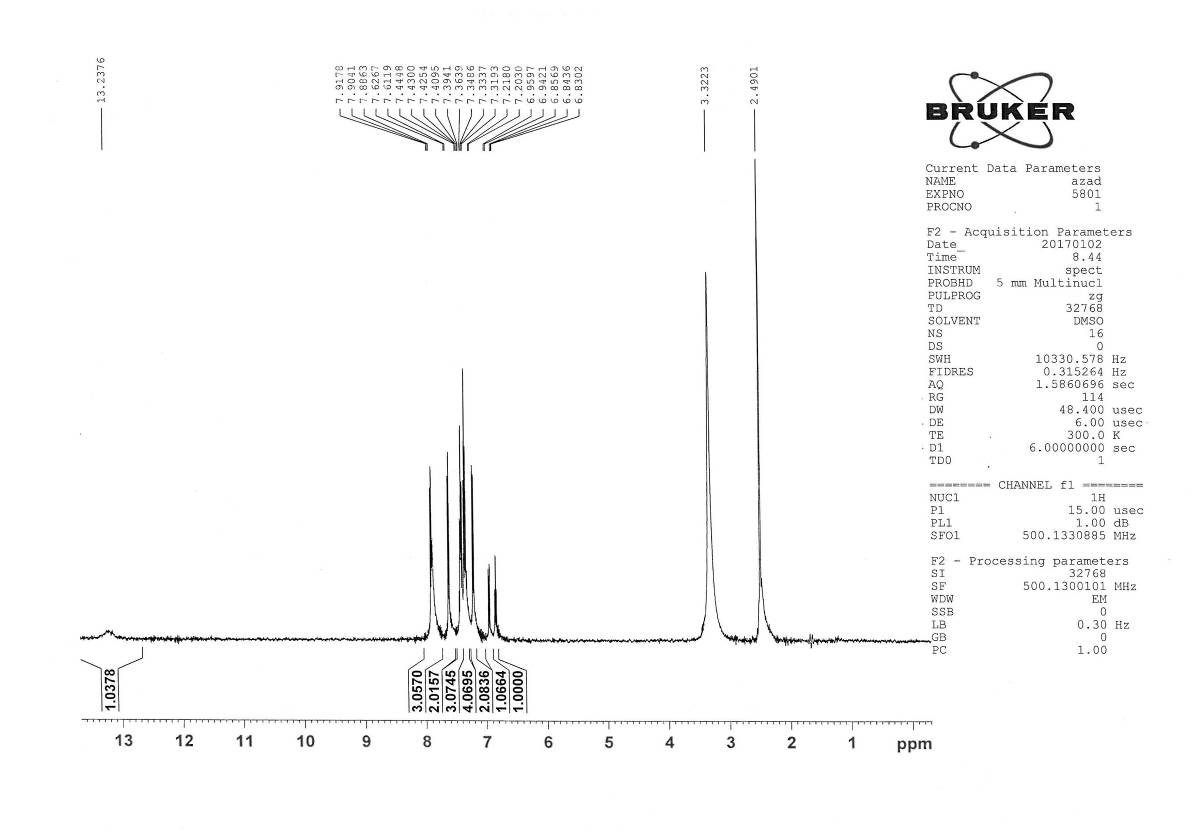
**

**
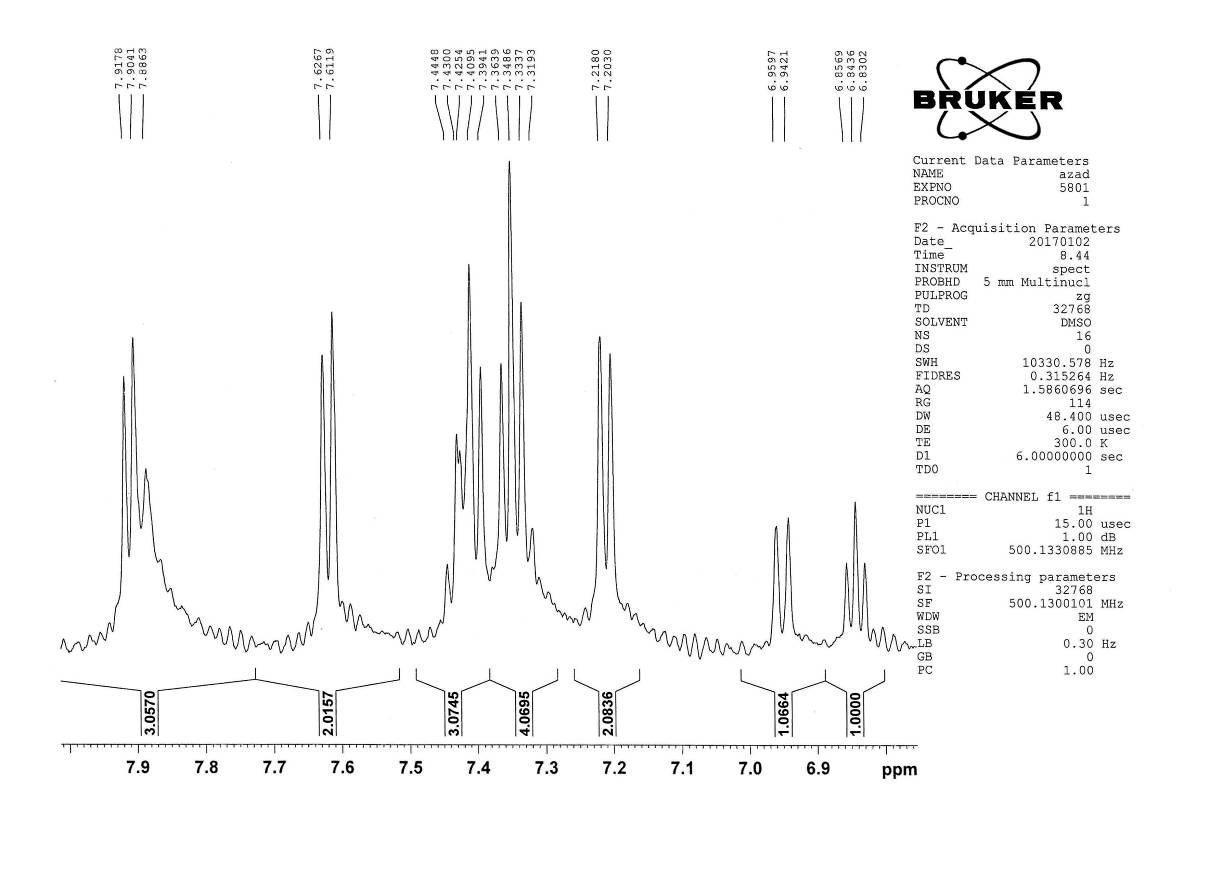
**

**
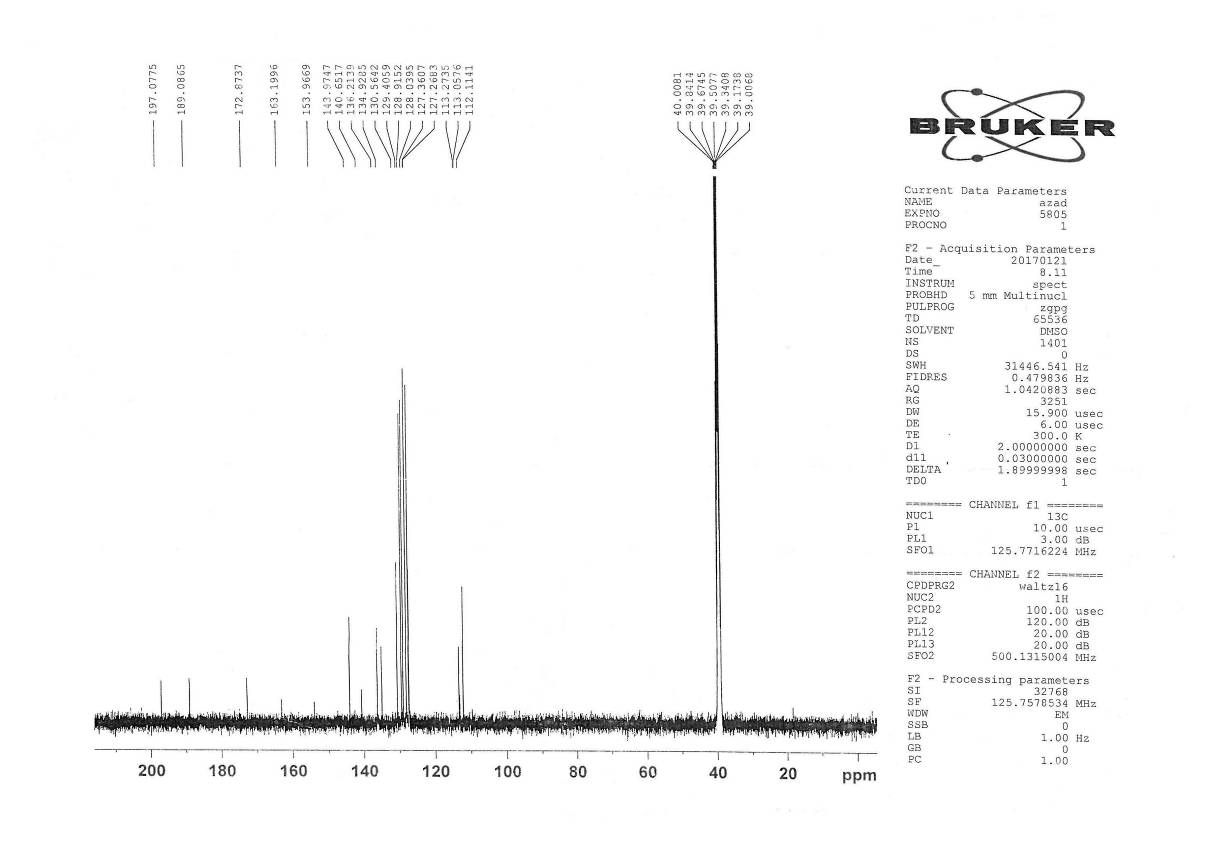
**

**
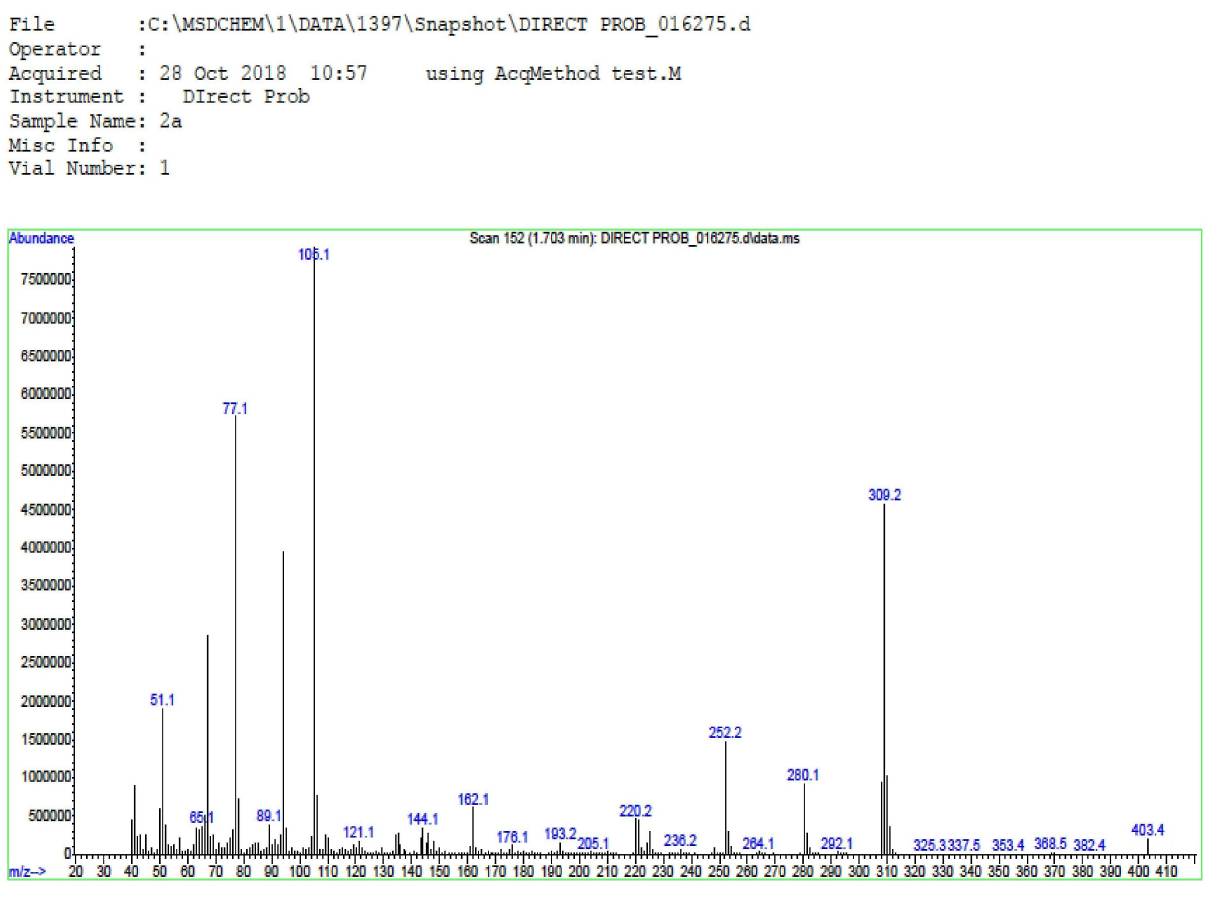
**

**(2*E*)-*N*-4-Methyl-2-pyridyl-2-hydroxy-4-oxo-4-phenyl-3-(*N*-phenylthiocarbamoyl)-2-butenamide (2b)**


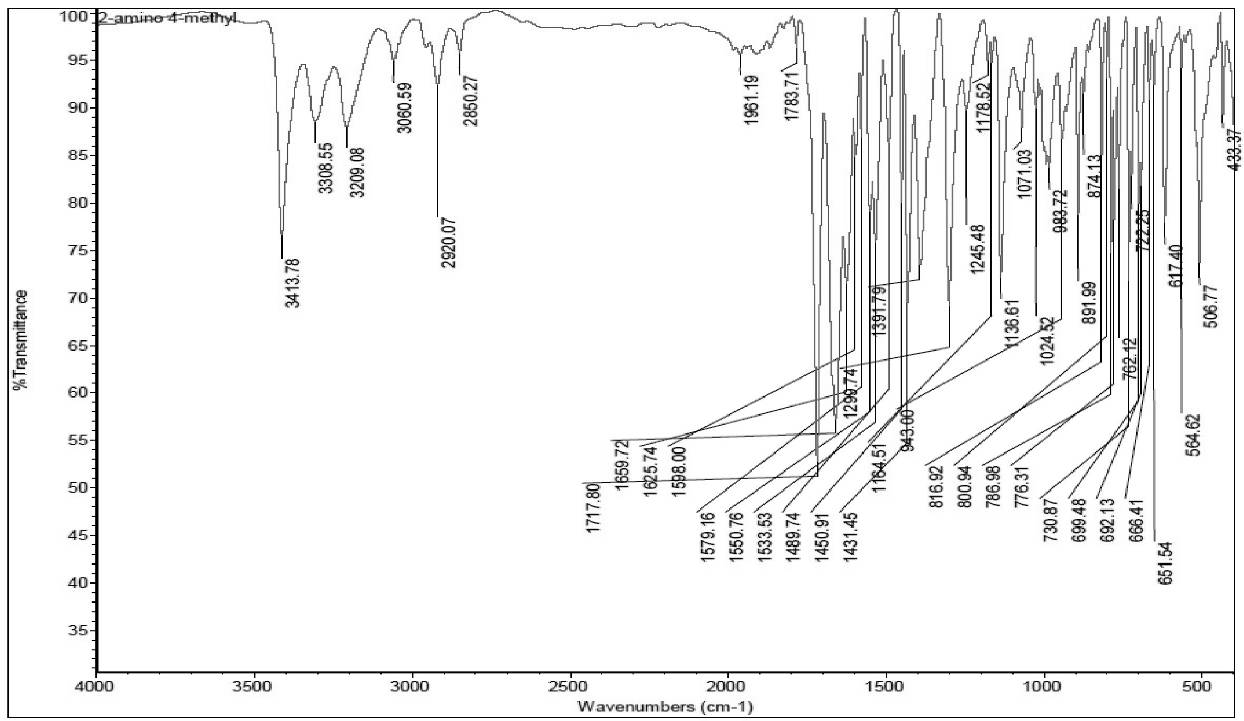


**
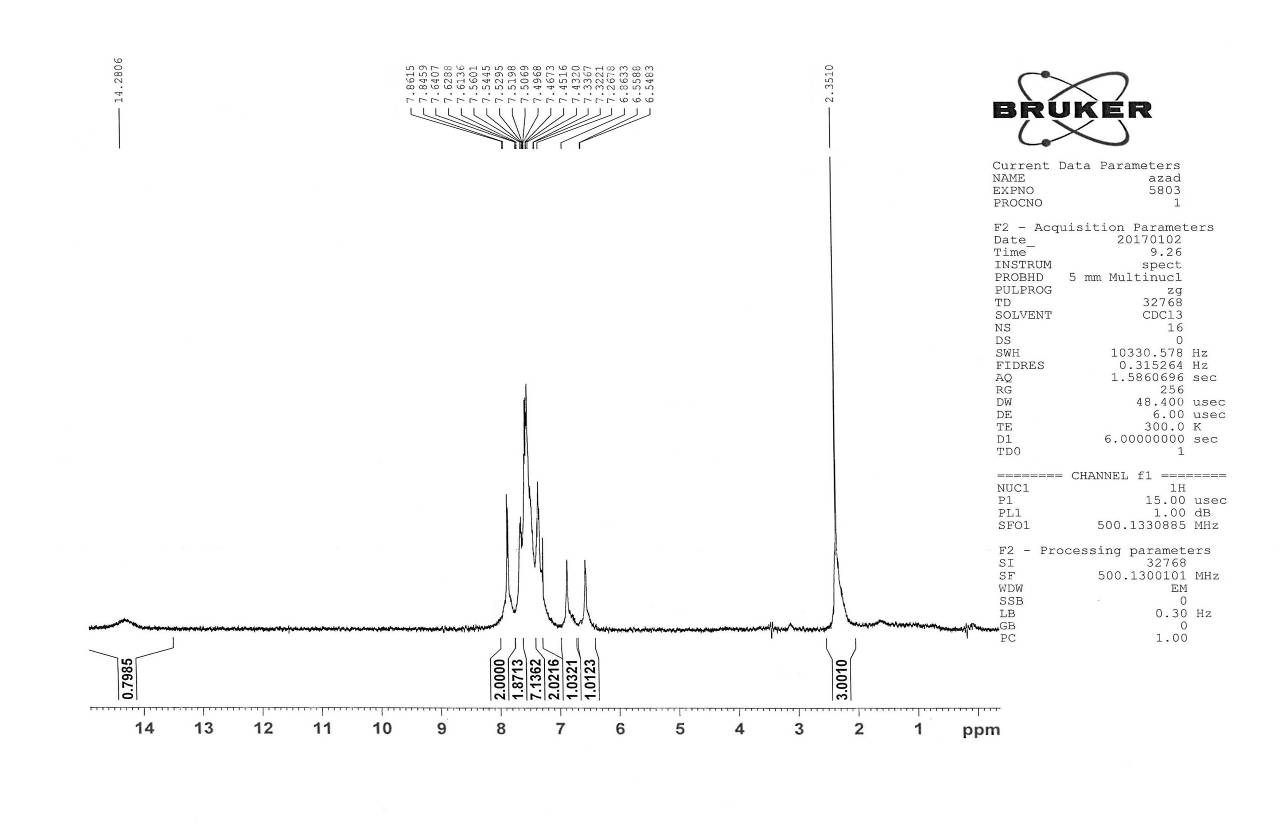
**

**
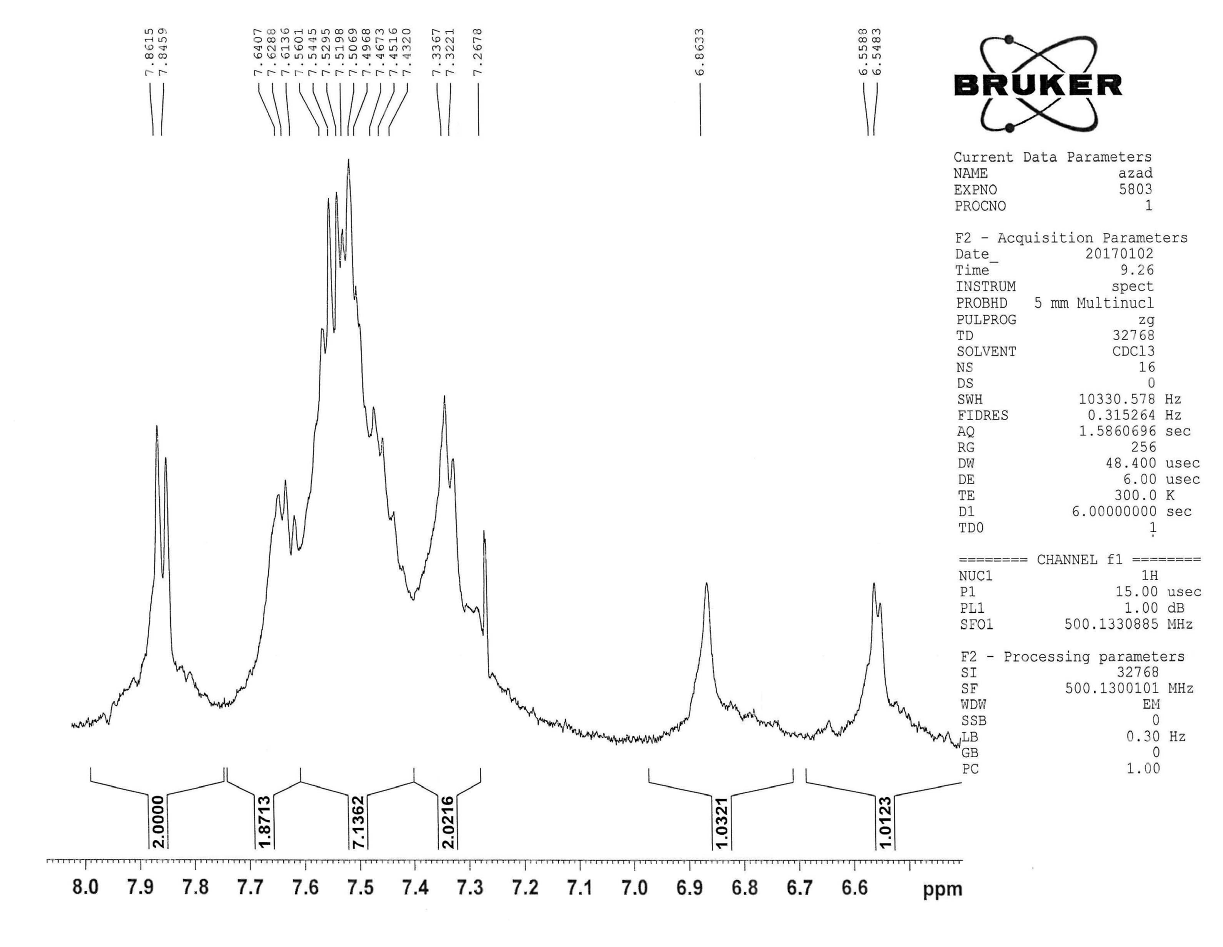
**

**
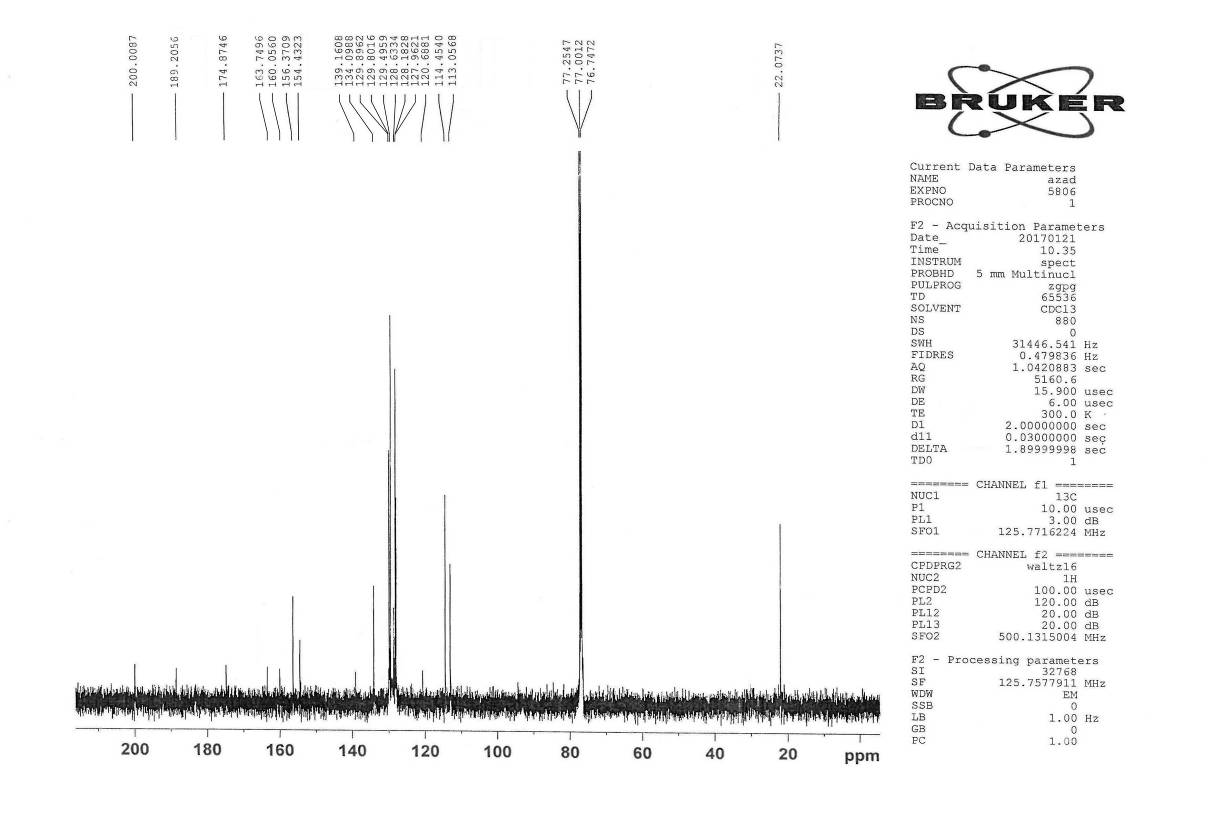
**

**
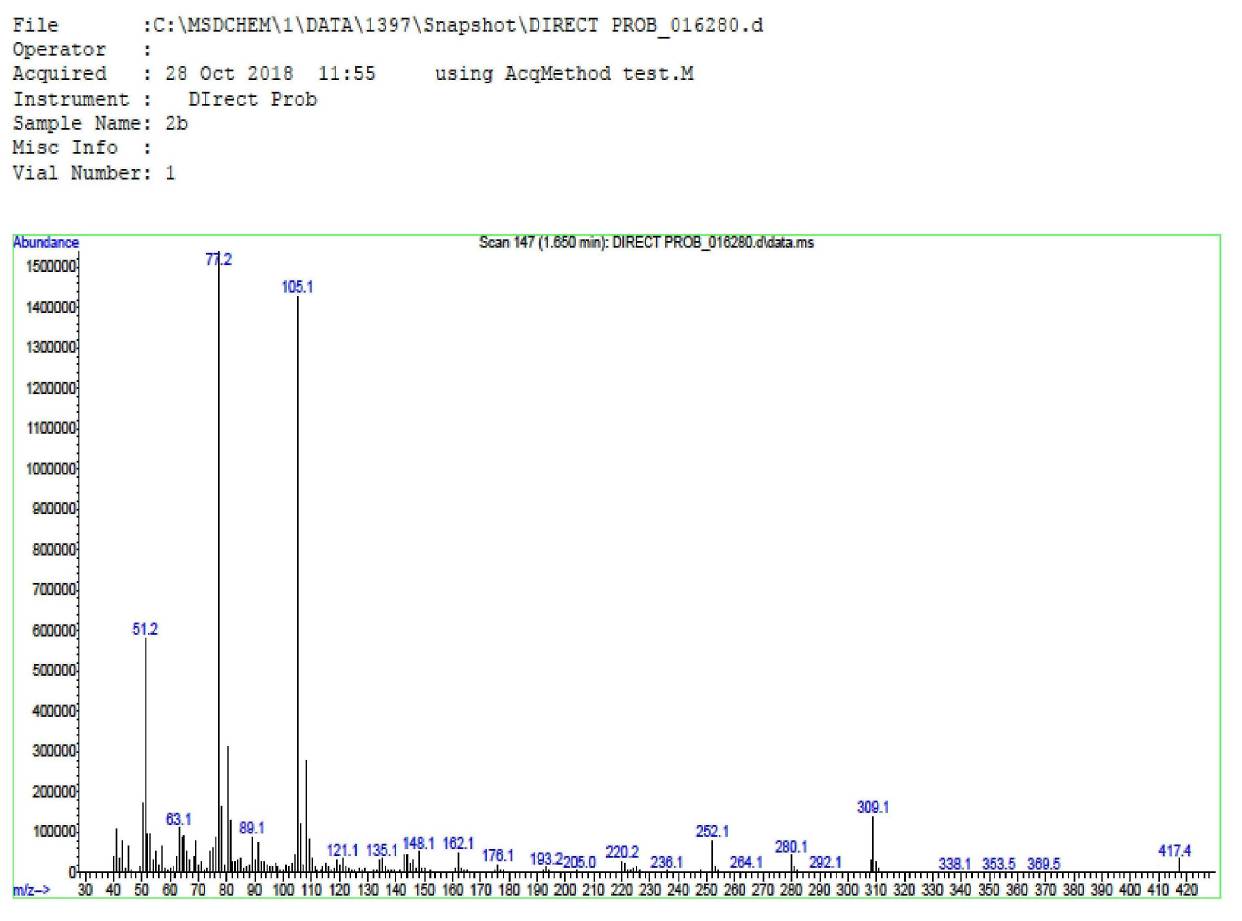
**

***N*-5-amino-6-(2,3-dichlorophenyl)-1,2,4-triazin-3-yl-(2*E*)-2-hydroxy-4-oxo-4-phenyl-3-(*N*-phenylthiocarbamoyl)-2-butenamide (2c)**


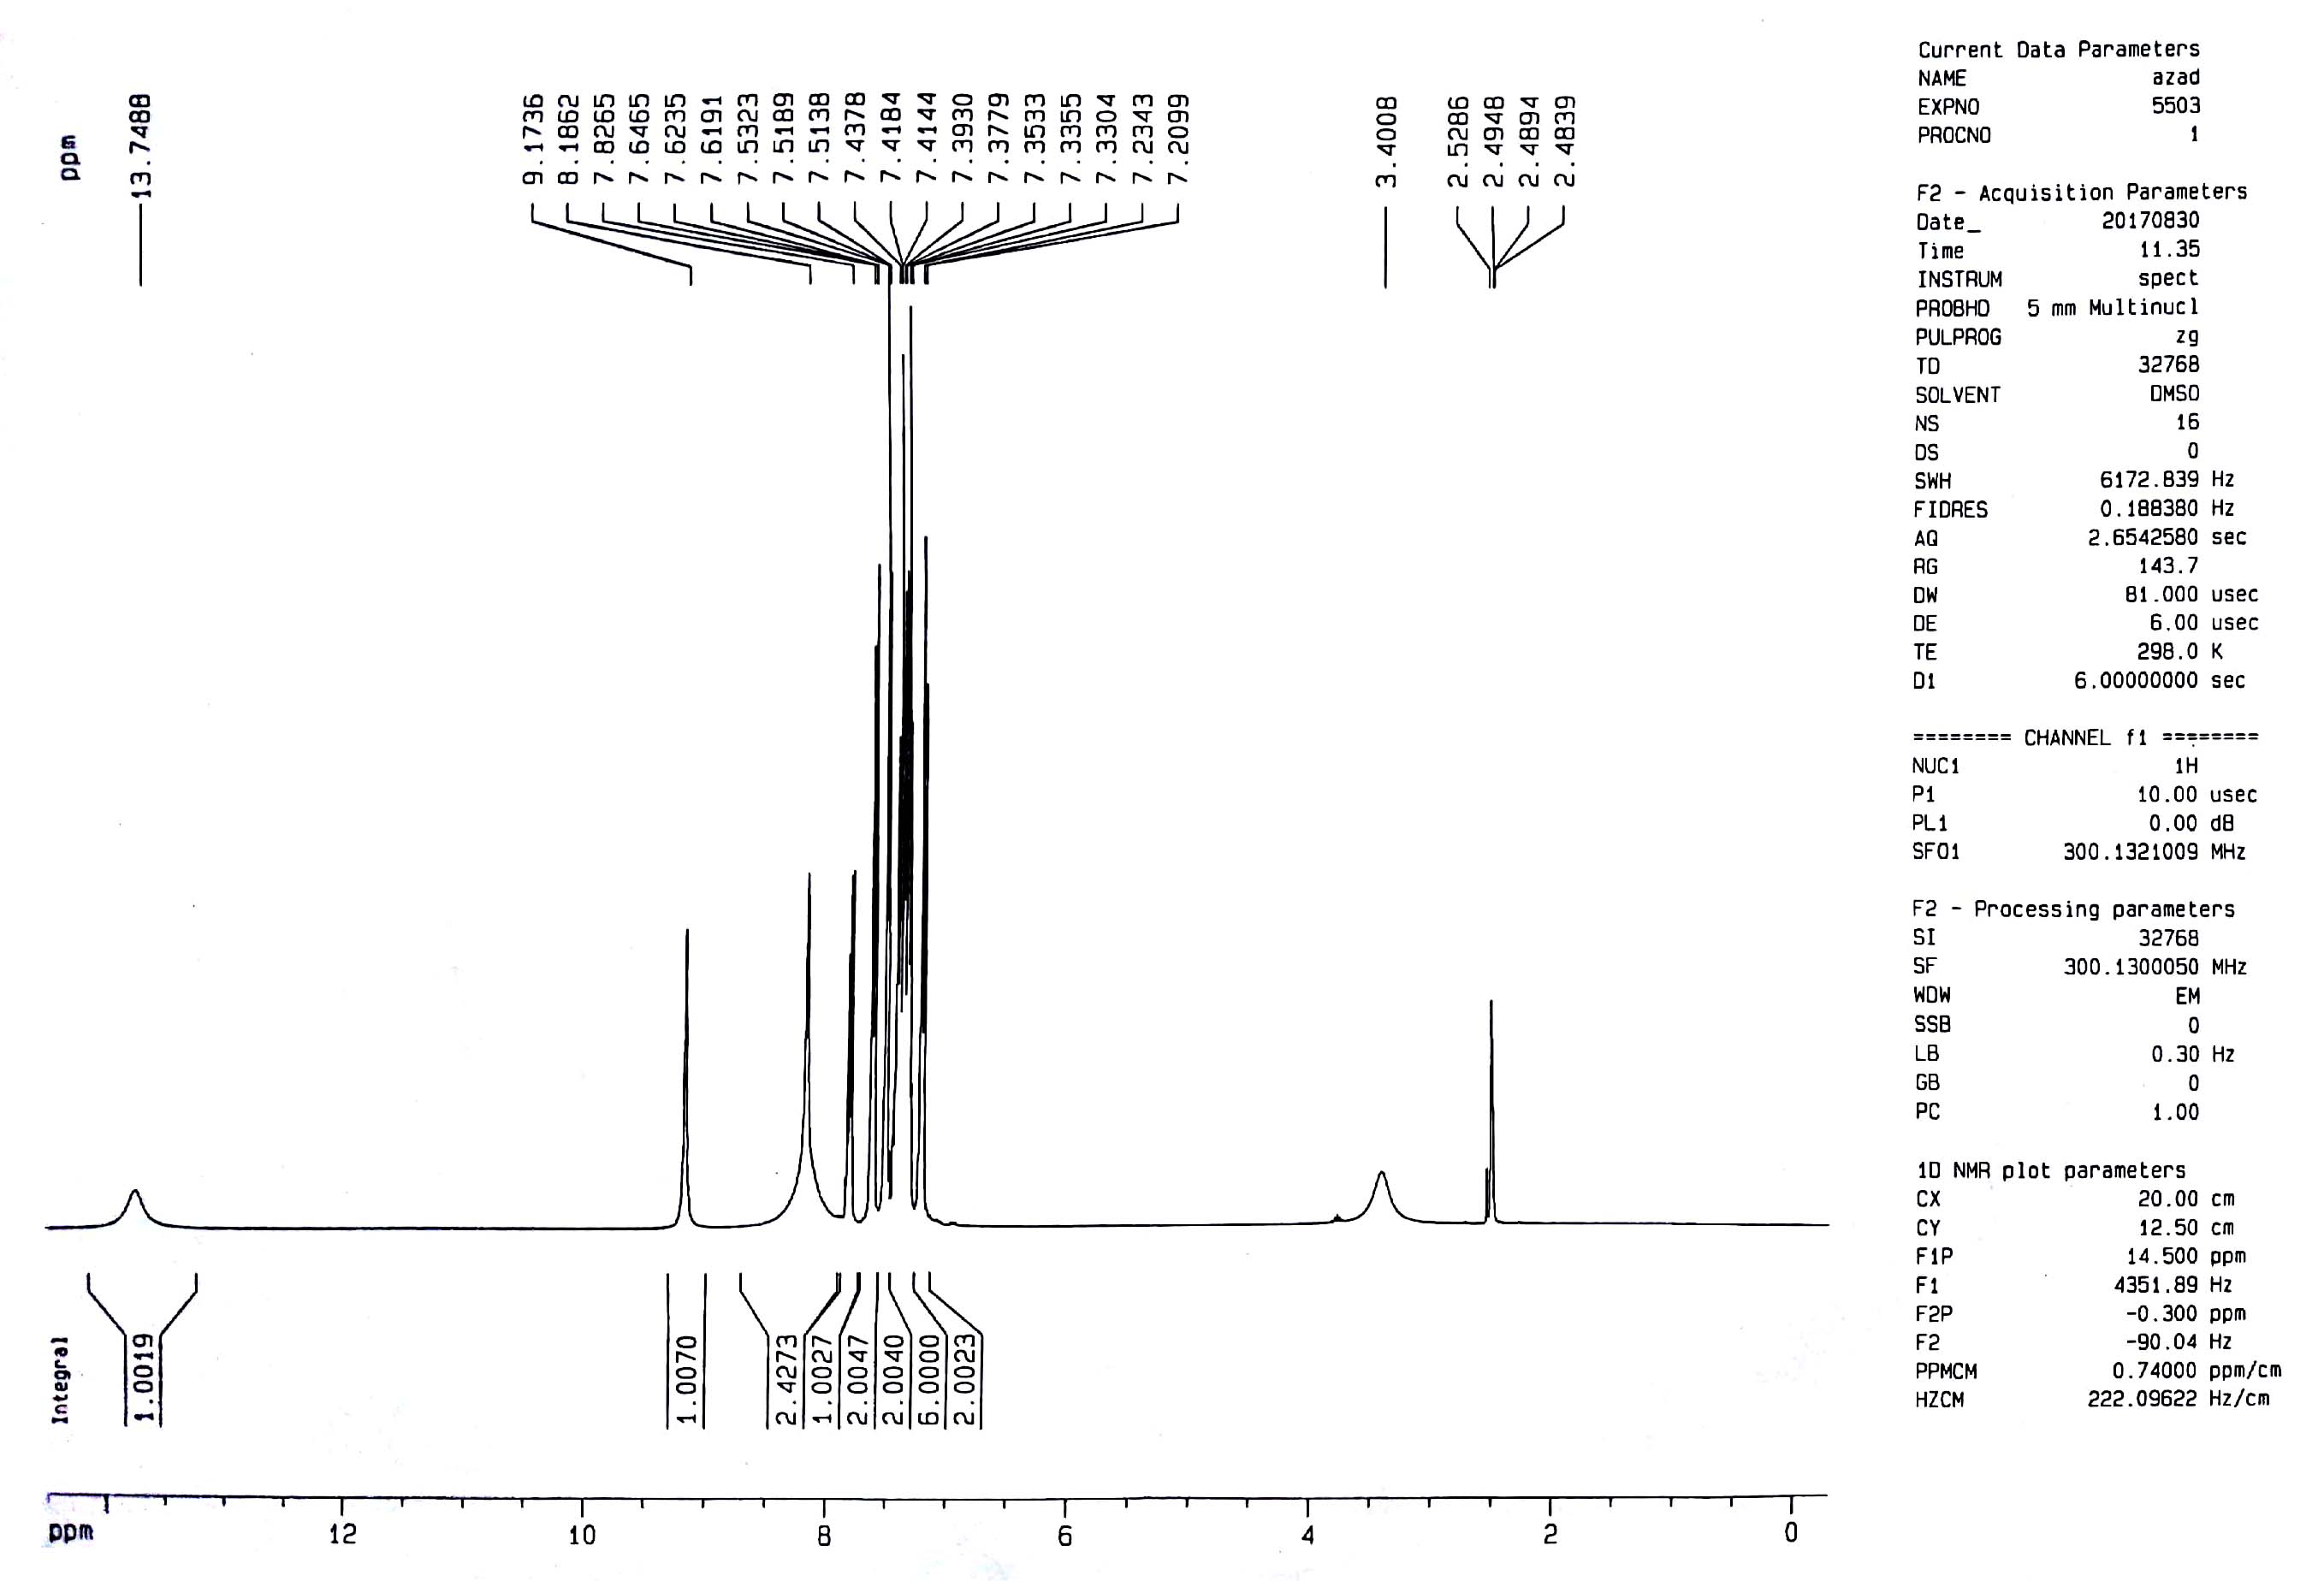


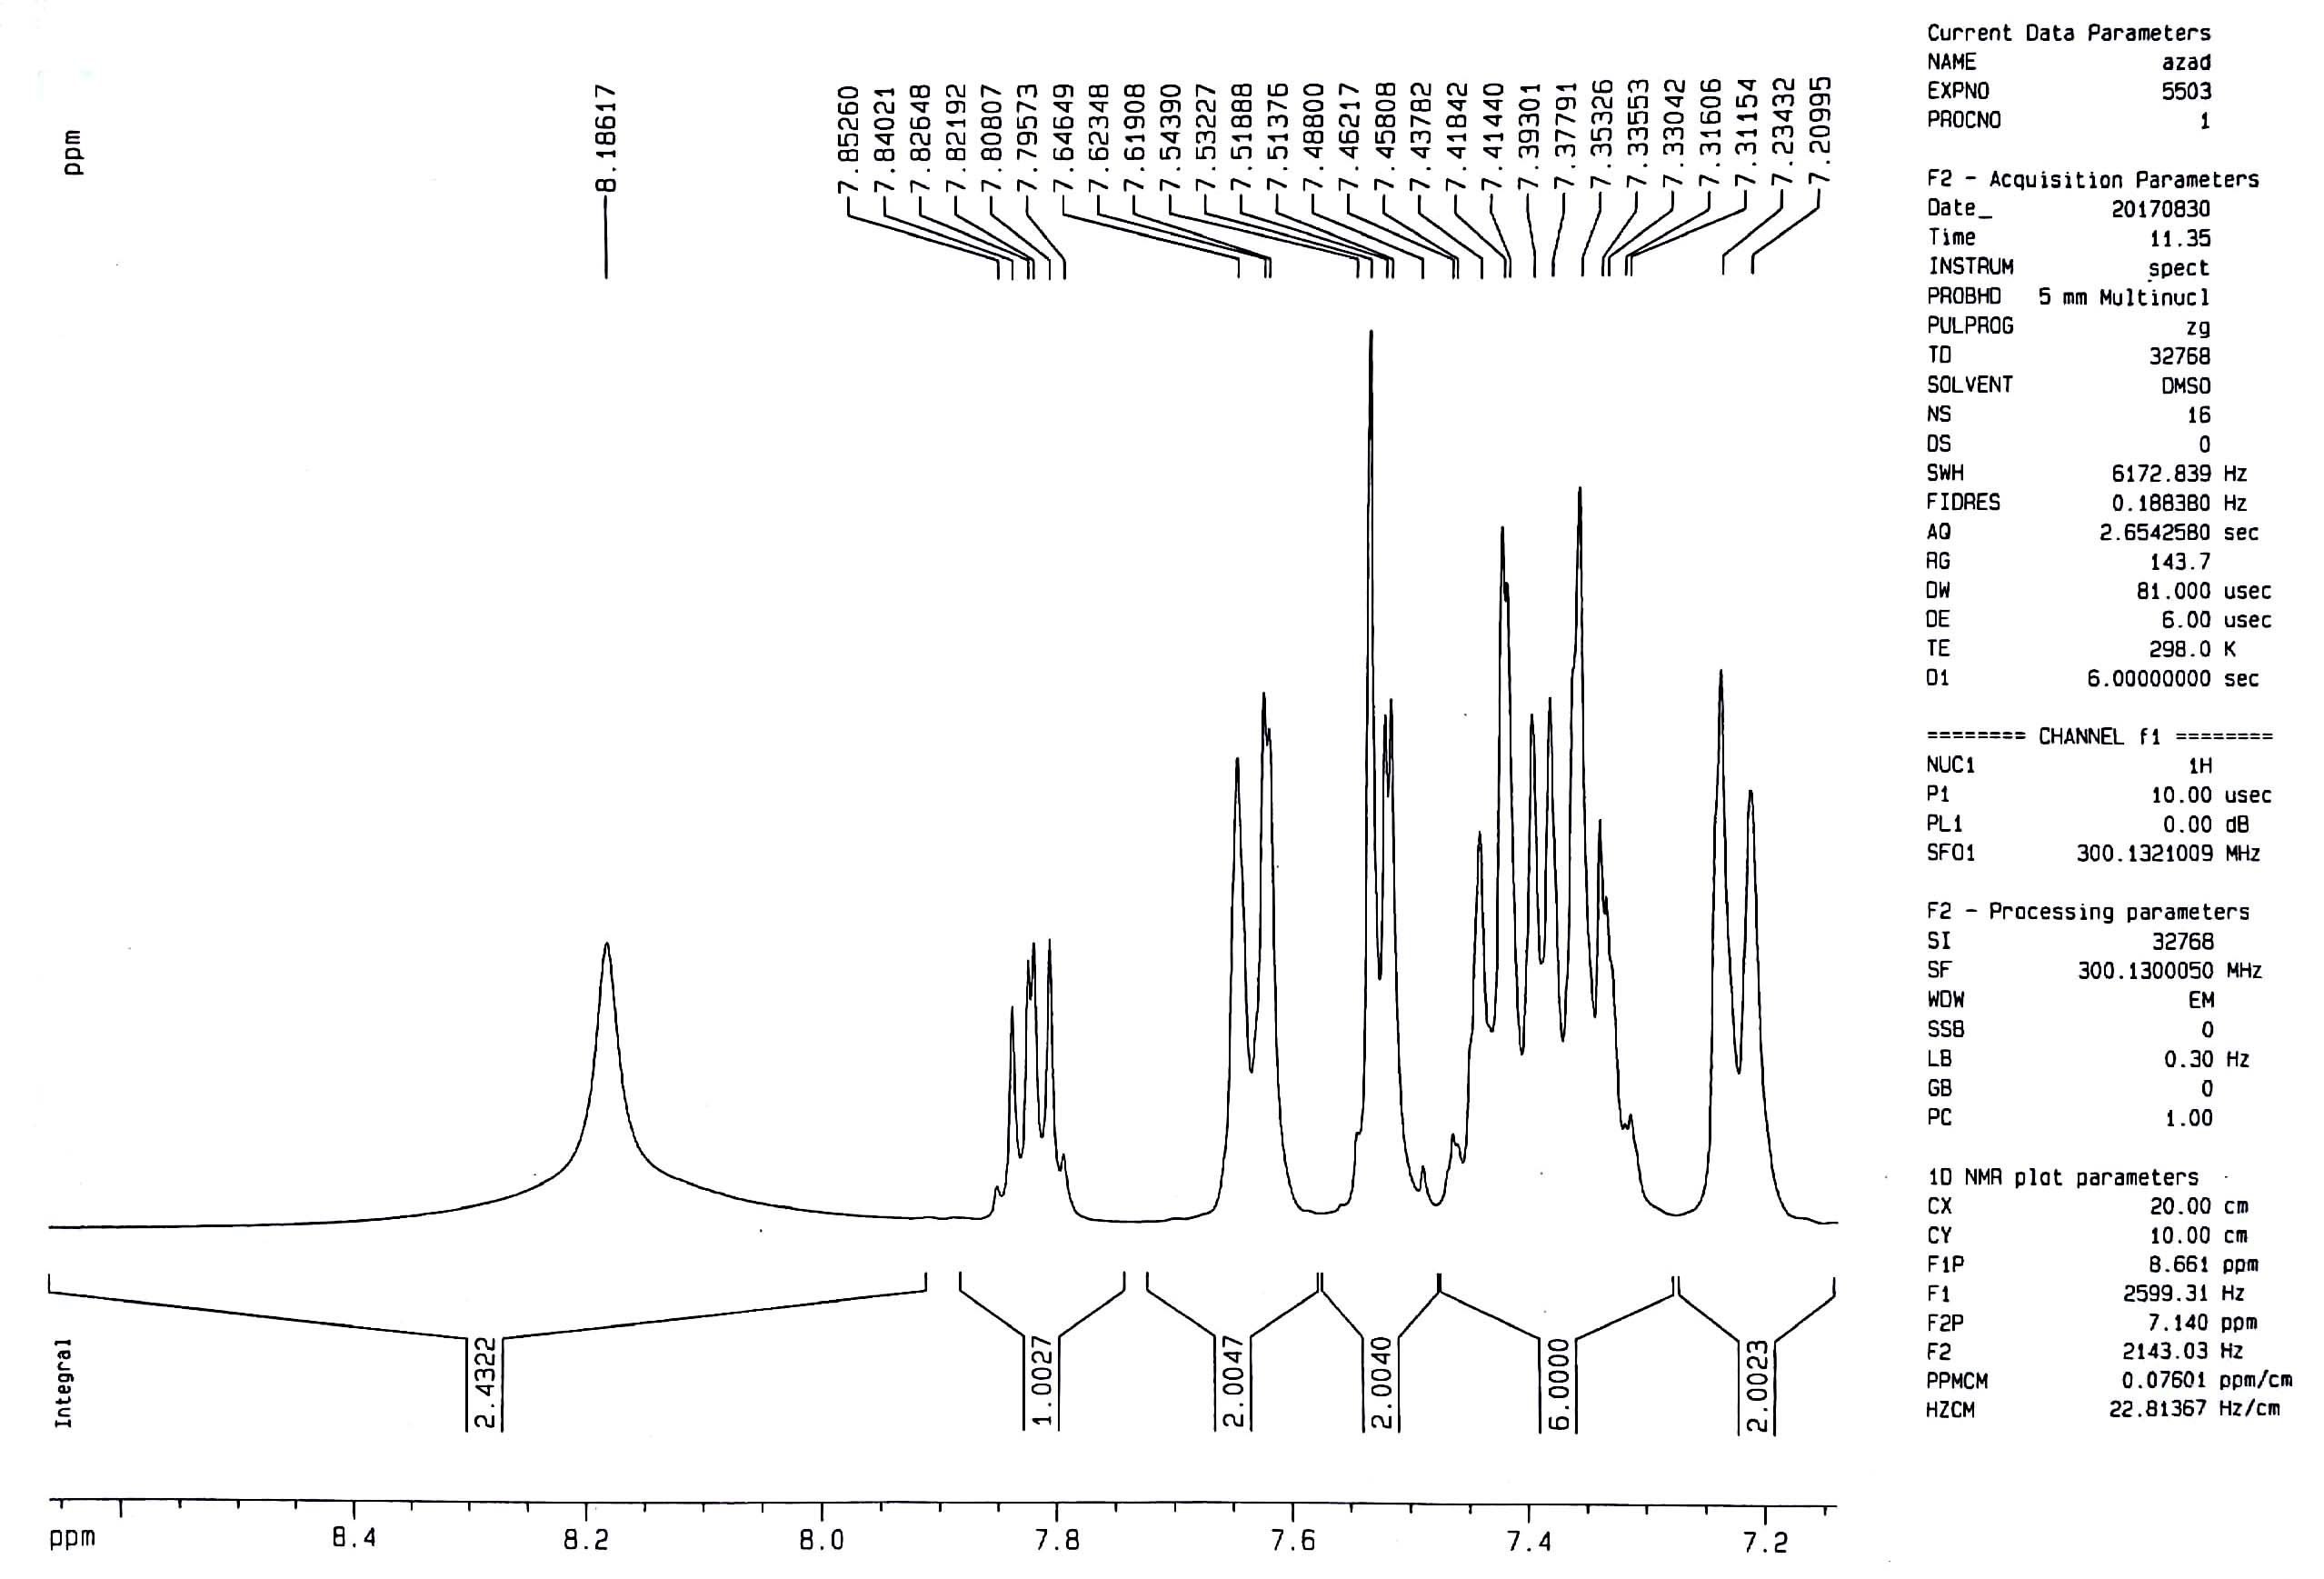


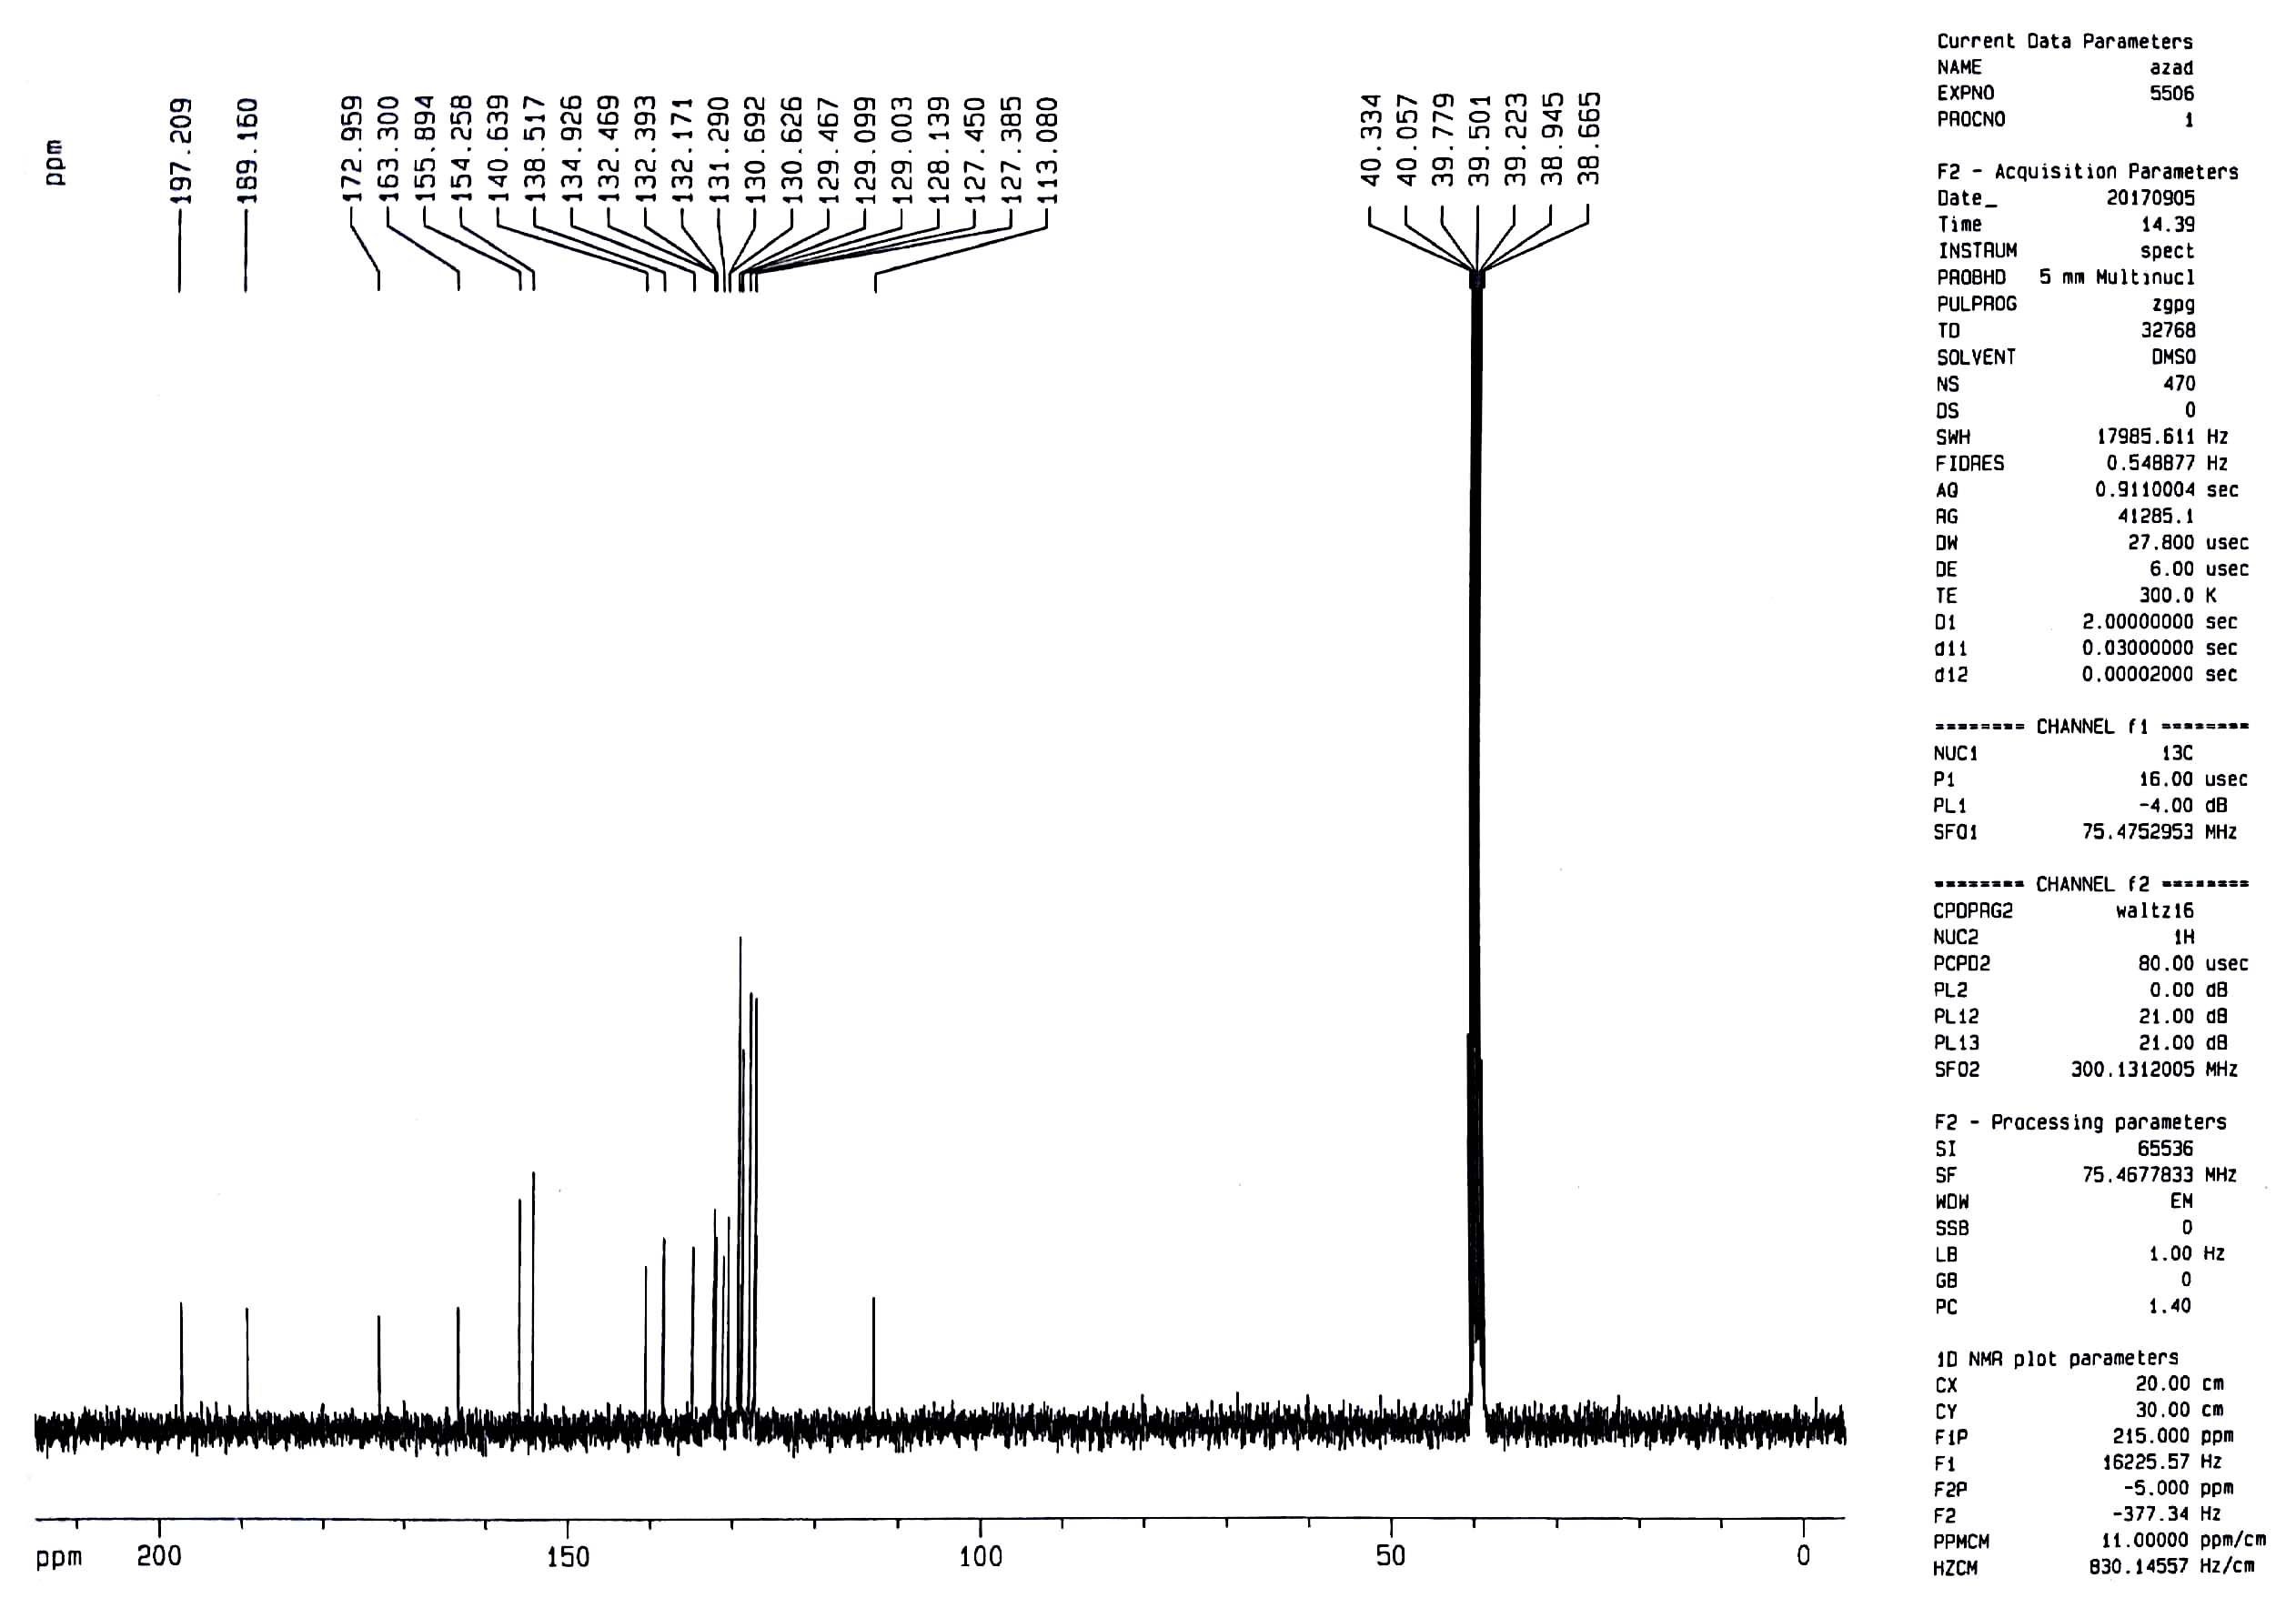


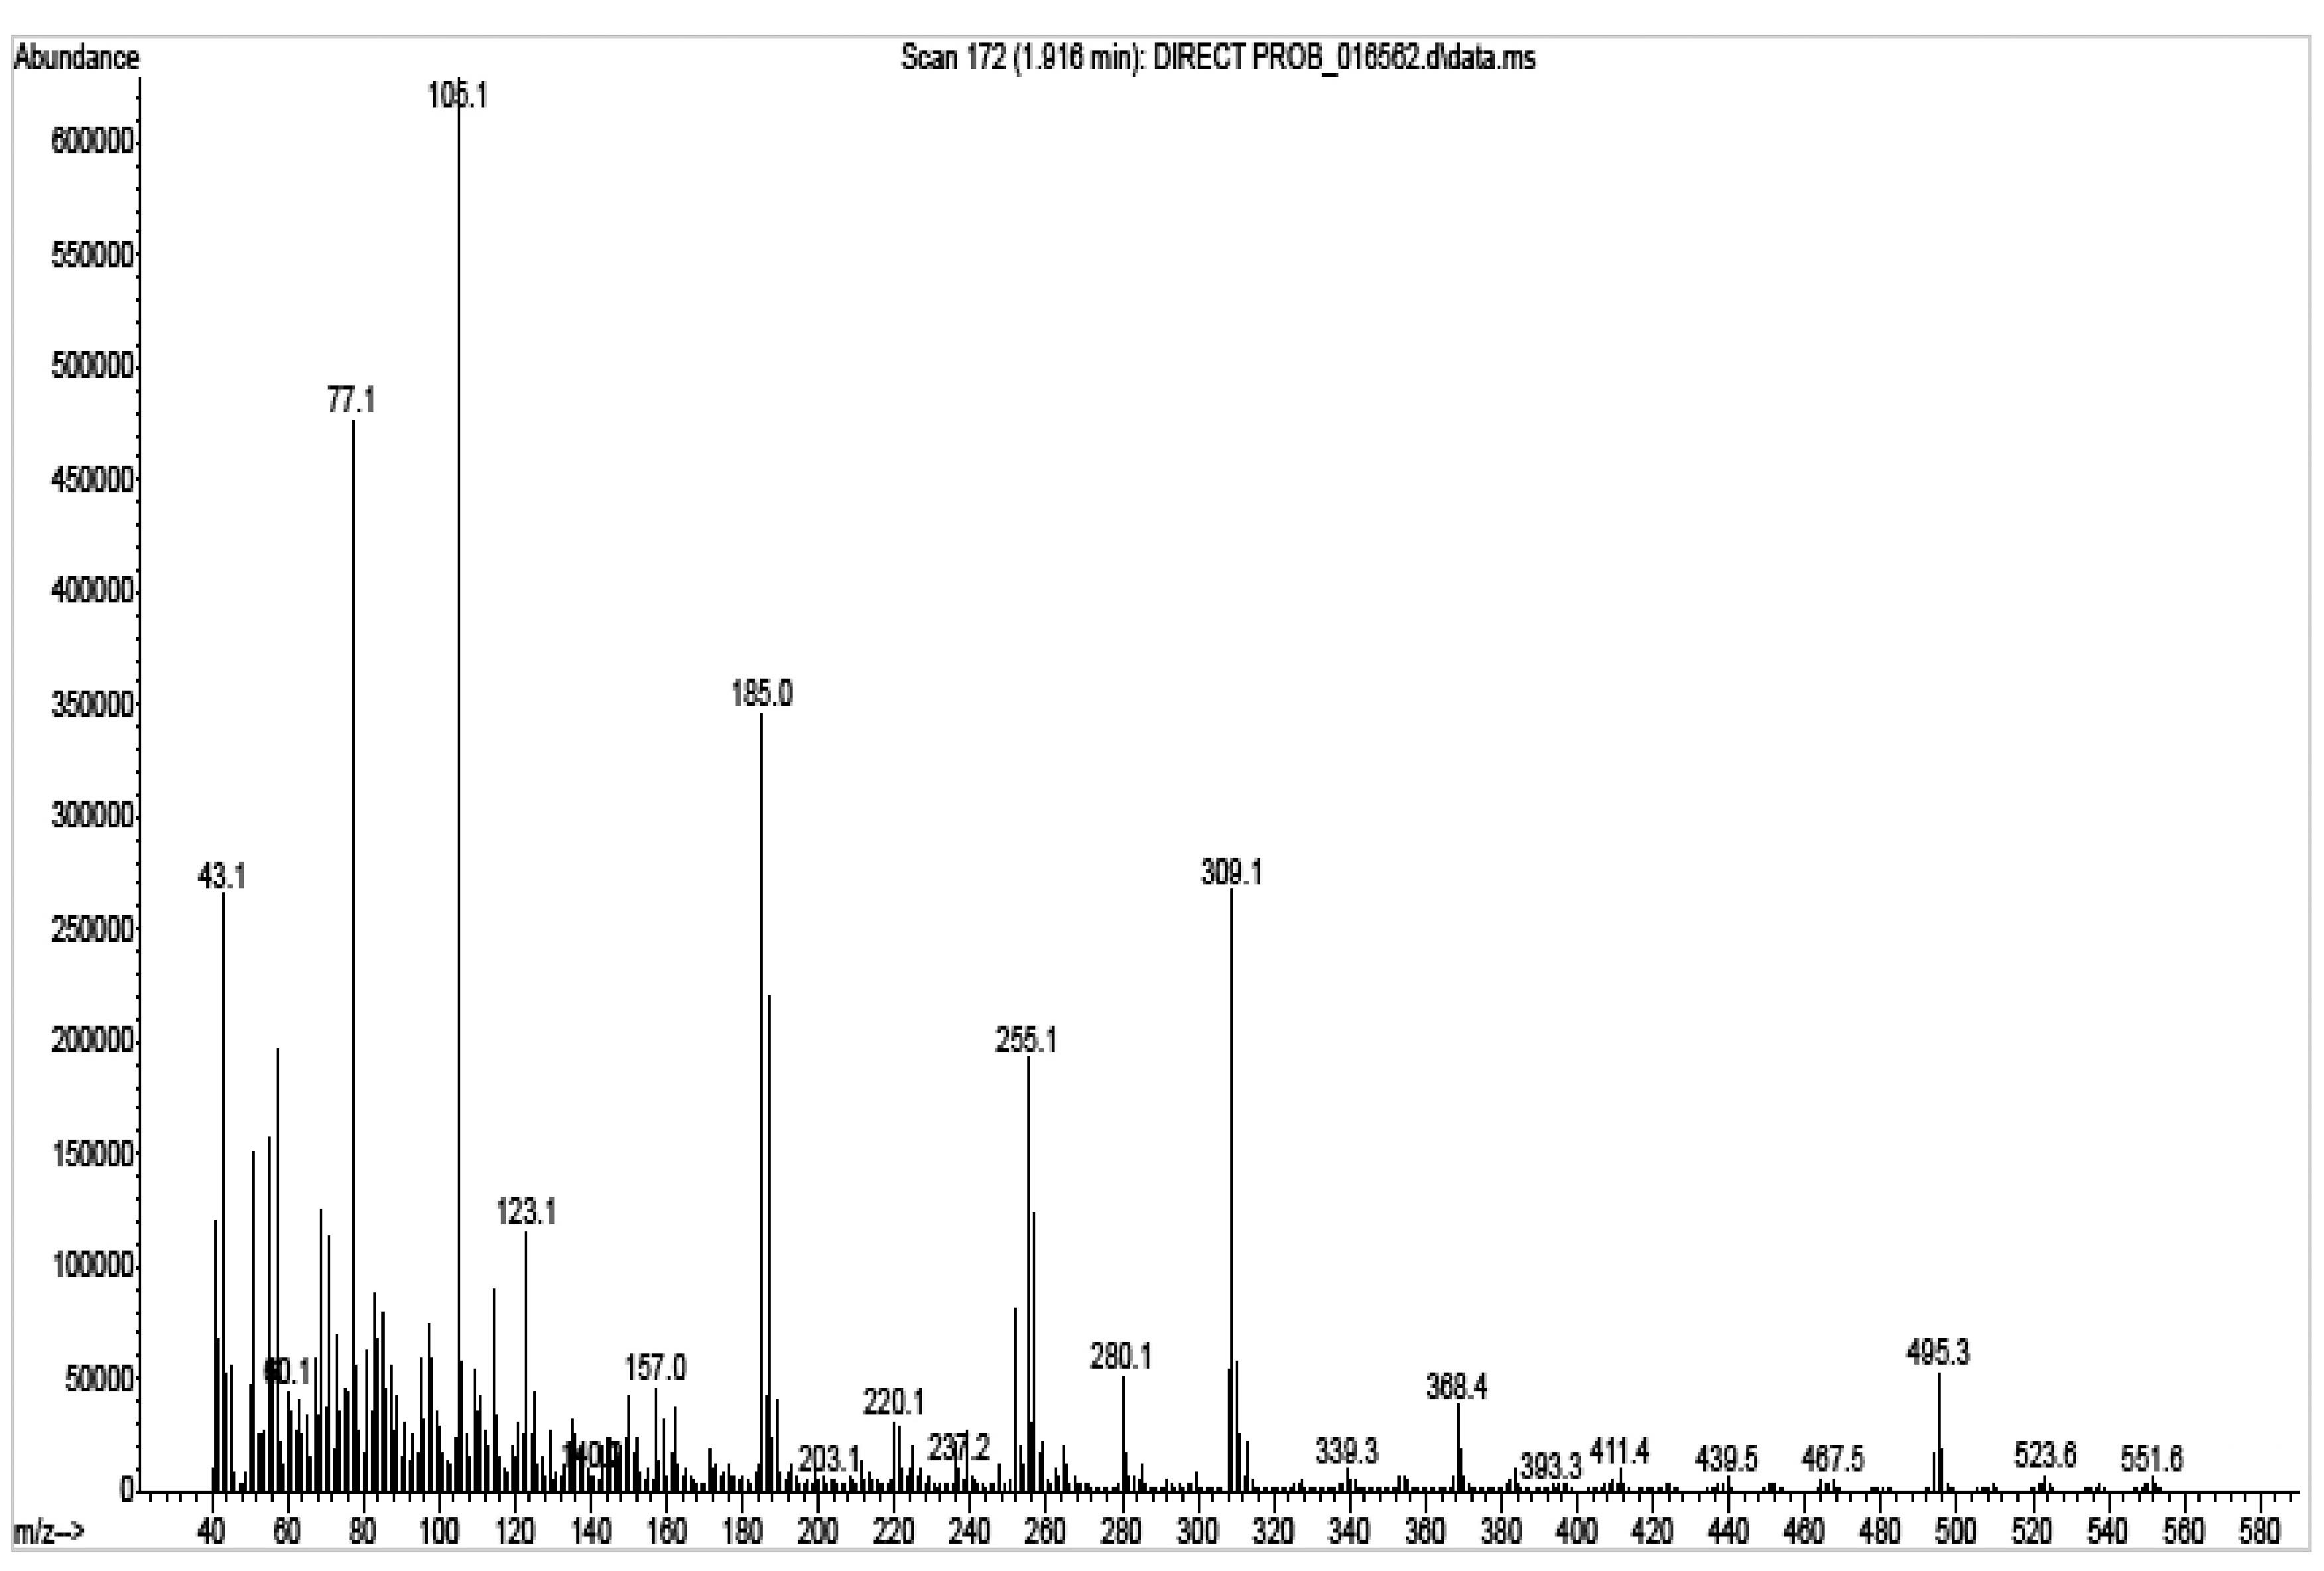


**2,6-Bis((2*E*)-2-hydroxy-4-oxo-4-phenyl-3-(*N*-phenylthiocarbamoyl)-2-butenamido)pyridine (3a)**


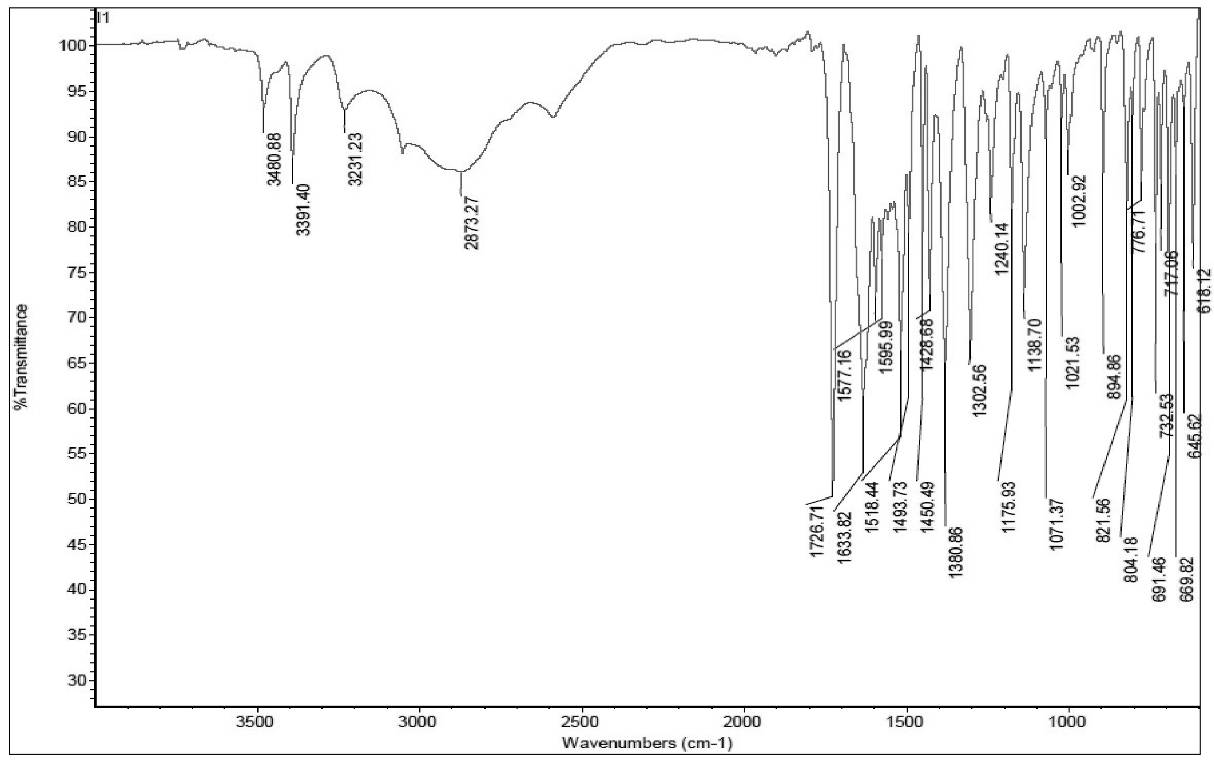


**
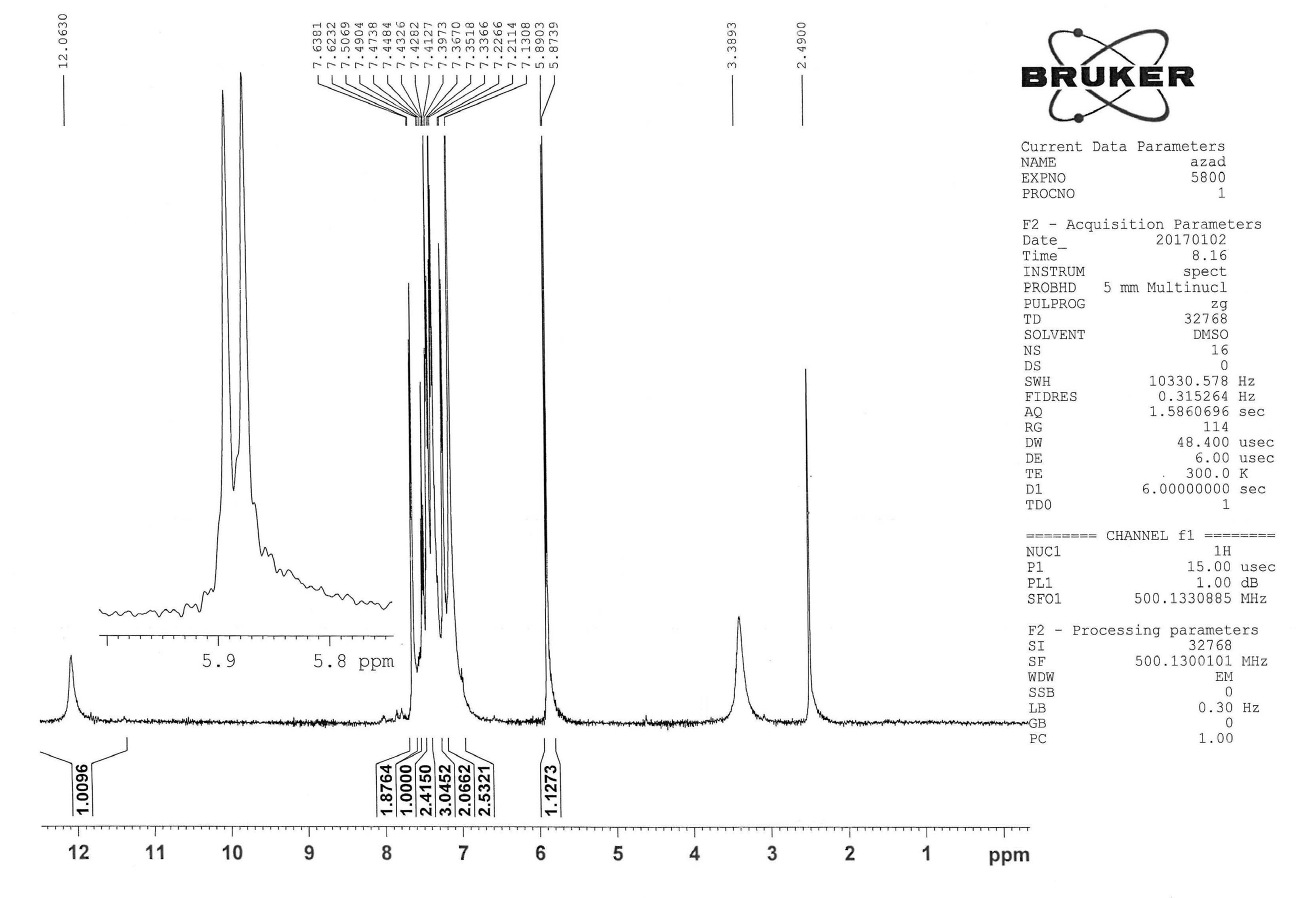
**

**
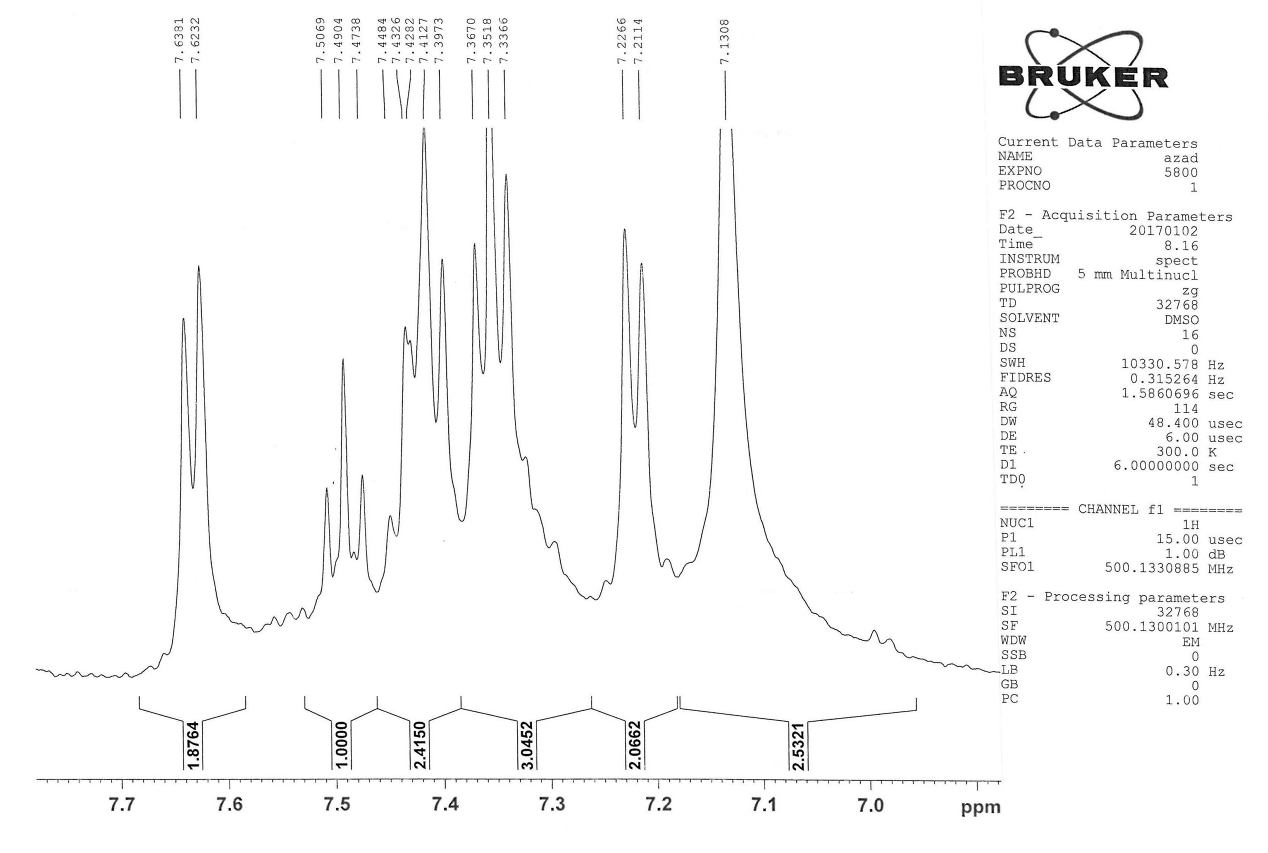
**

**
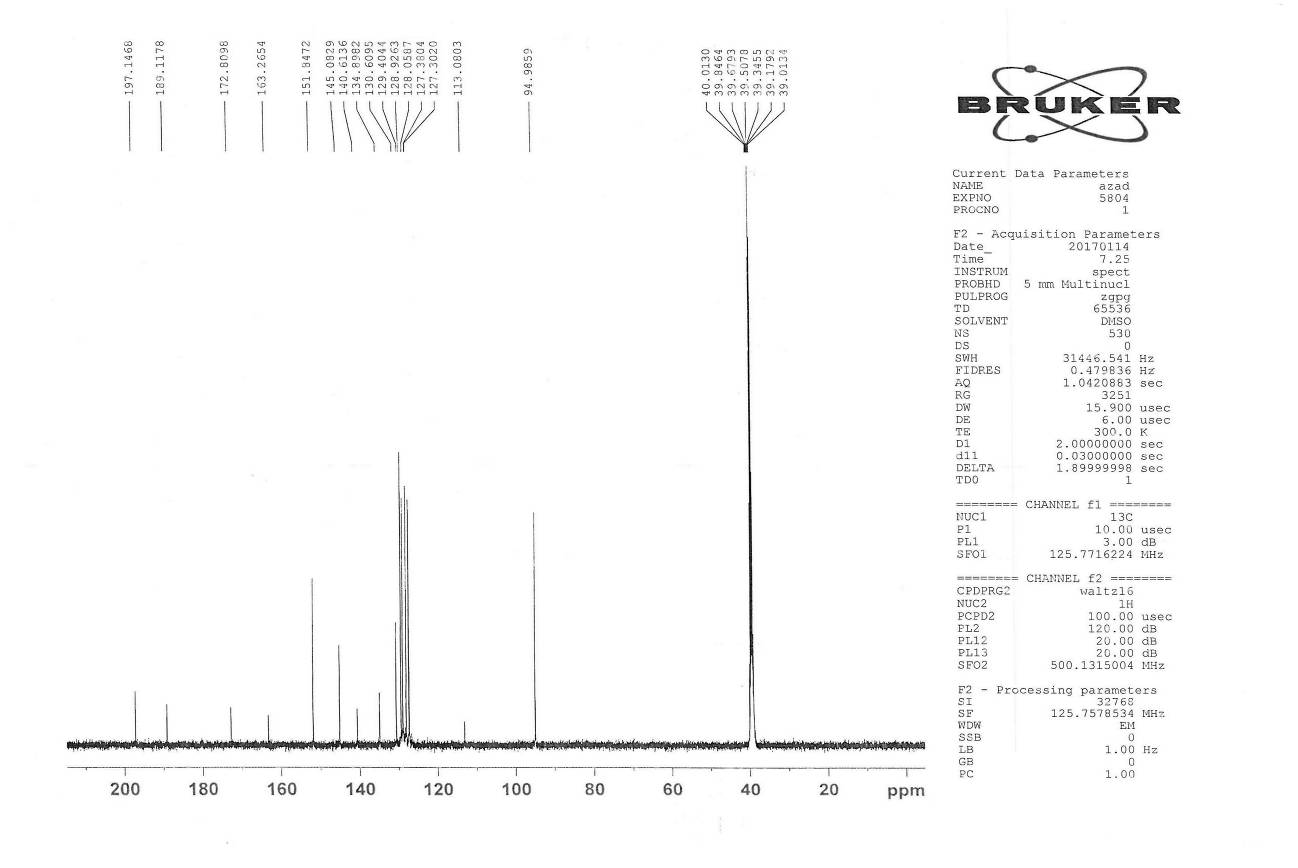
**

**
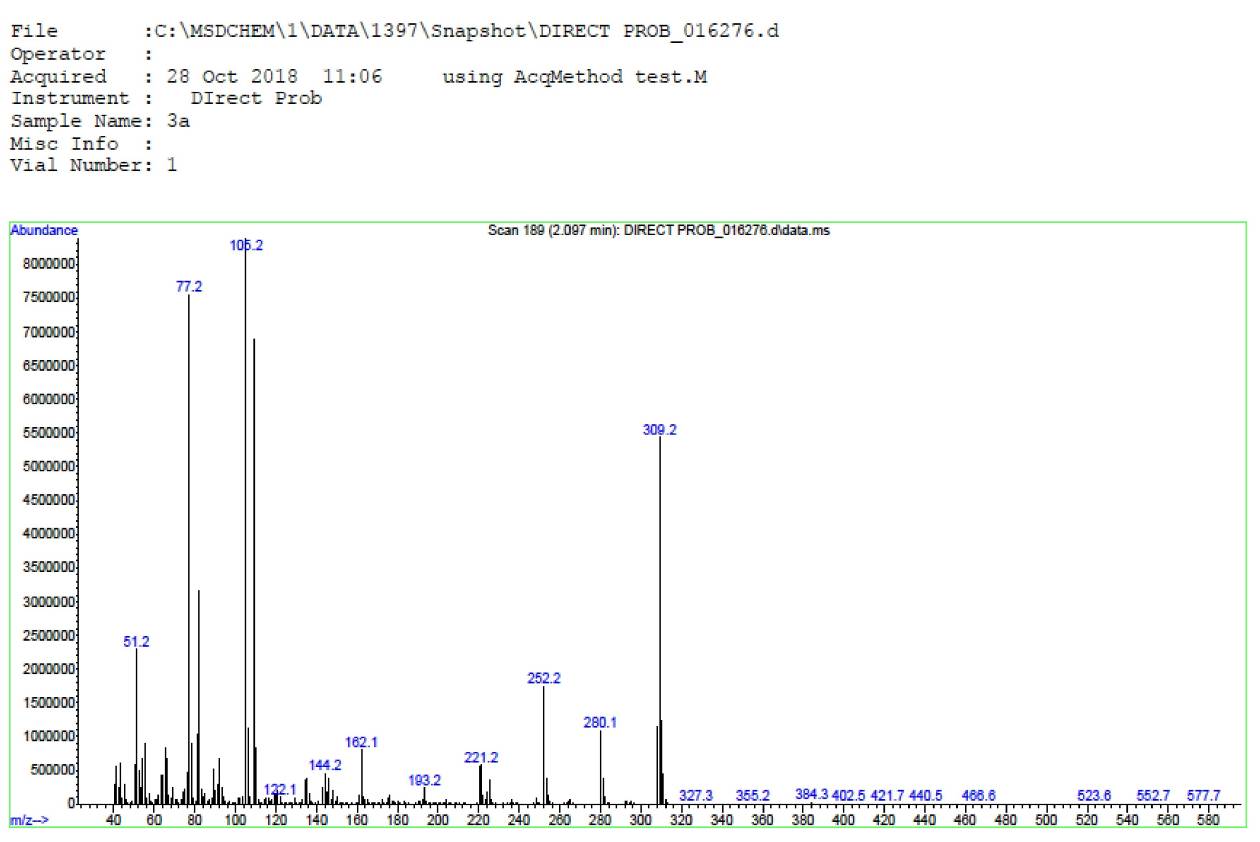
**

**2,4-Bis((2*E*)-2-hydroxy-4-oxo-4-phenyl-3-(*N*-phenylthiocarbamoyl)-2-butenamido)-6-phenyl-1,3,5-triazine (3b)**


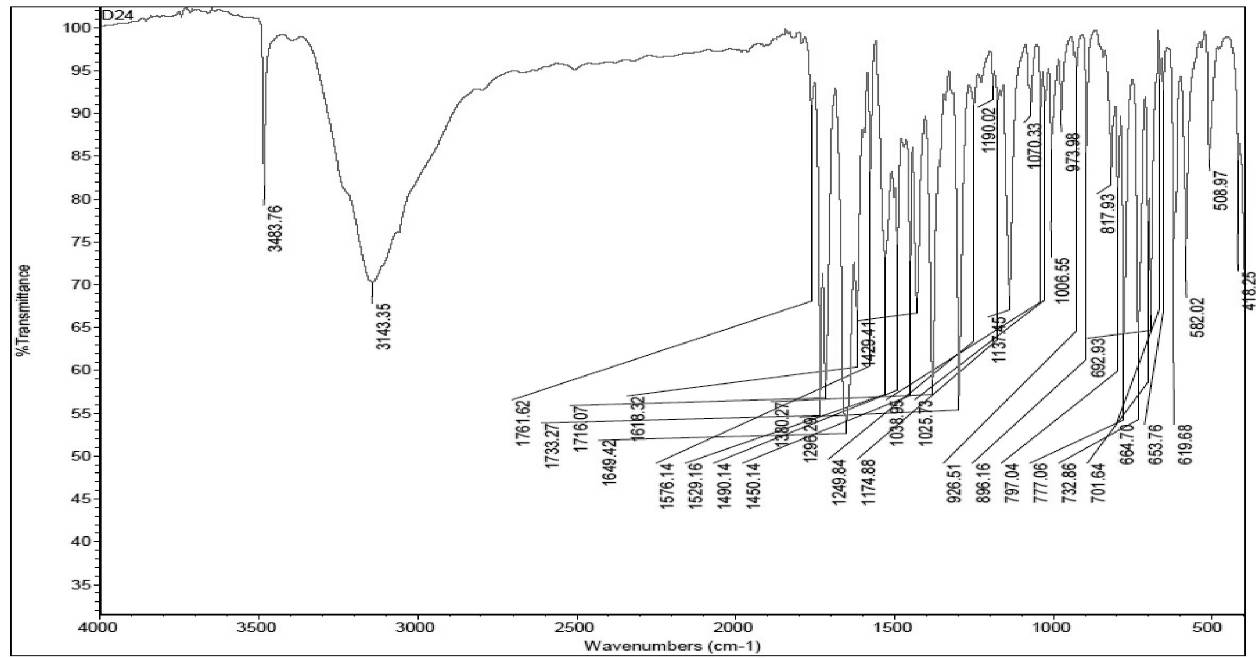


**
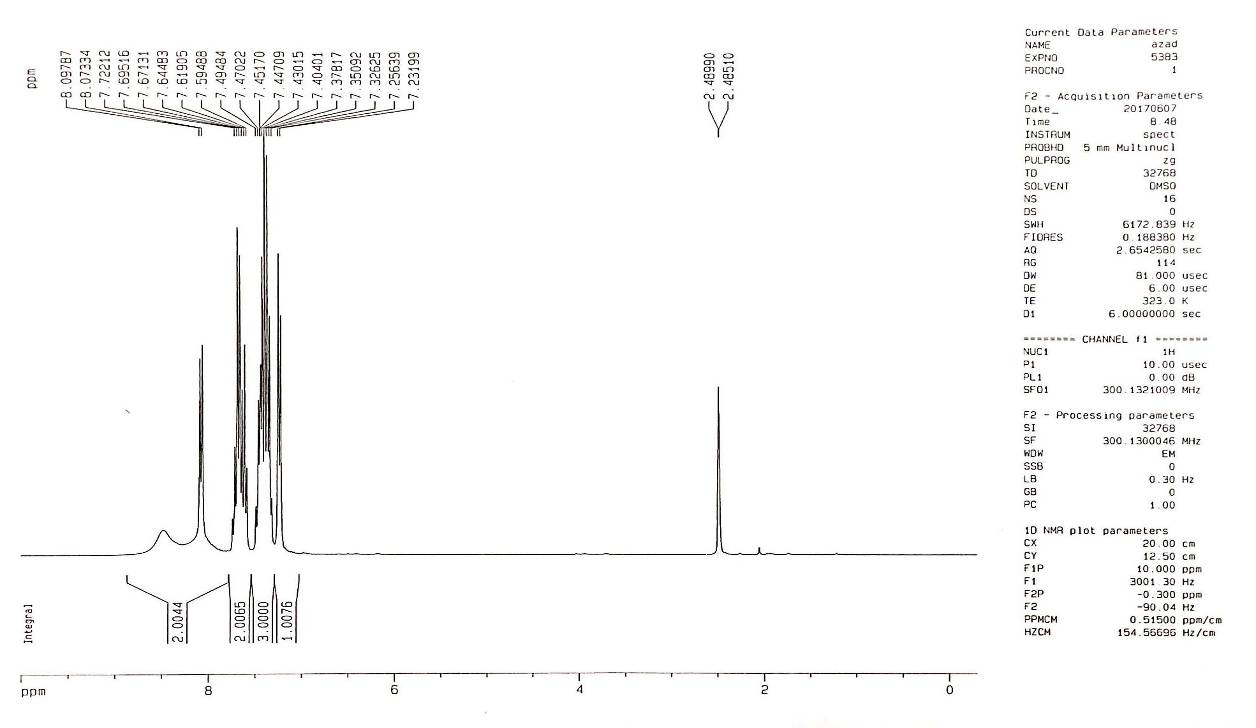
**

**
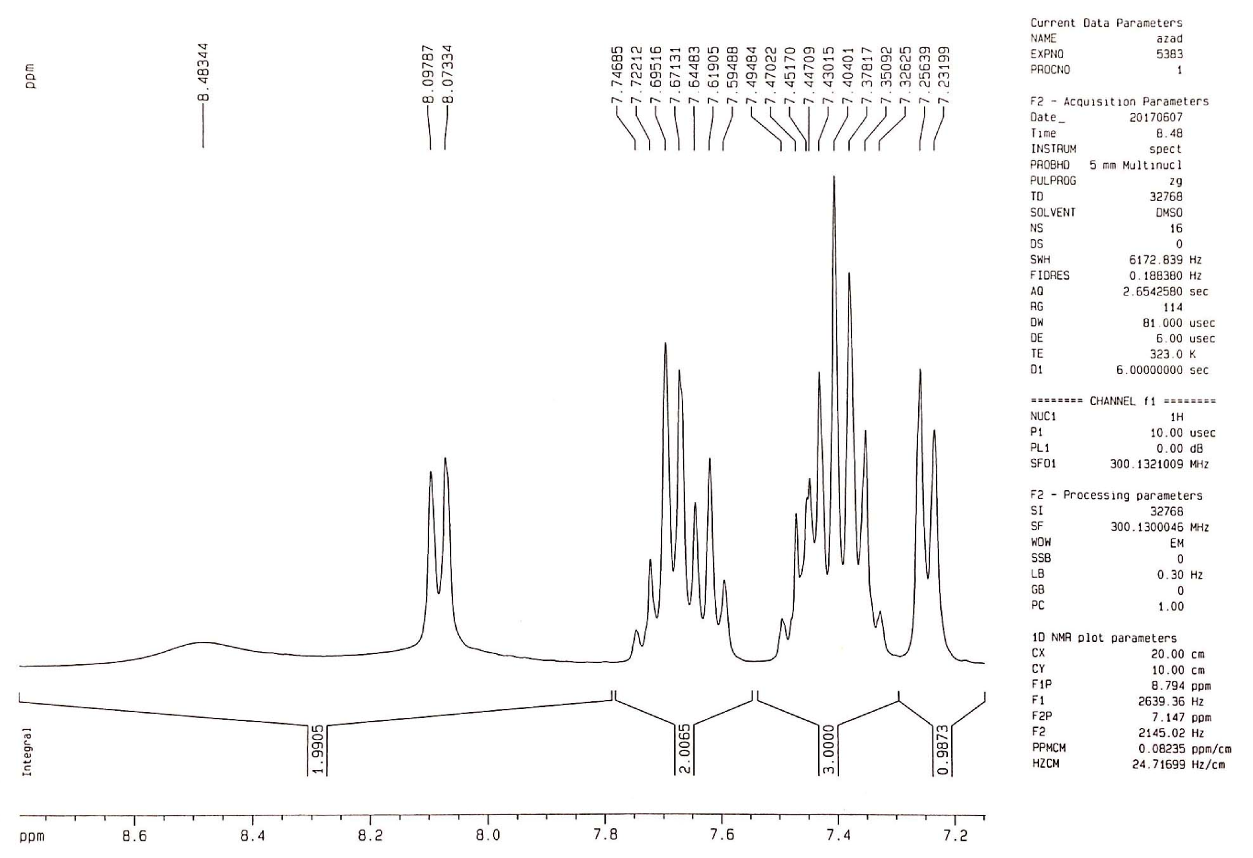

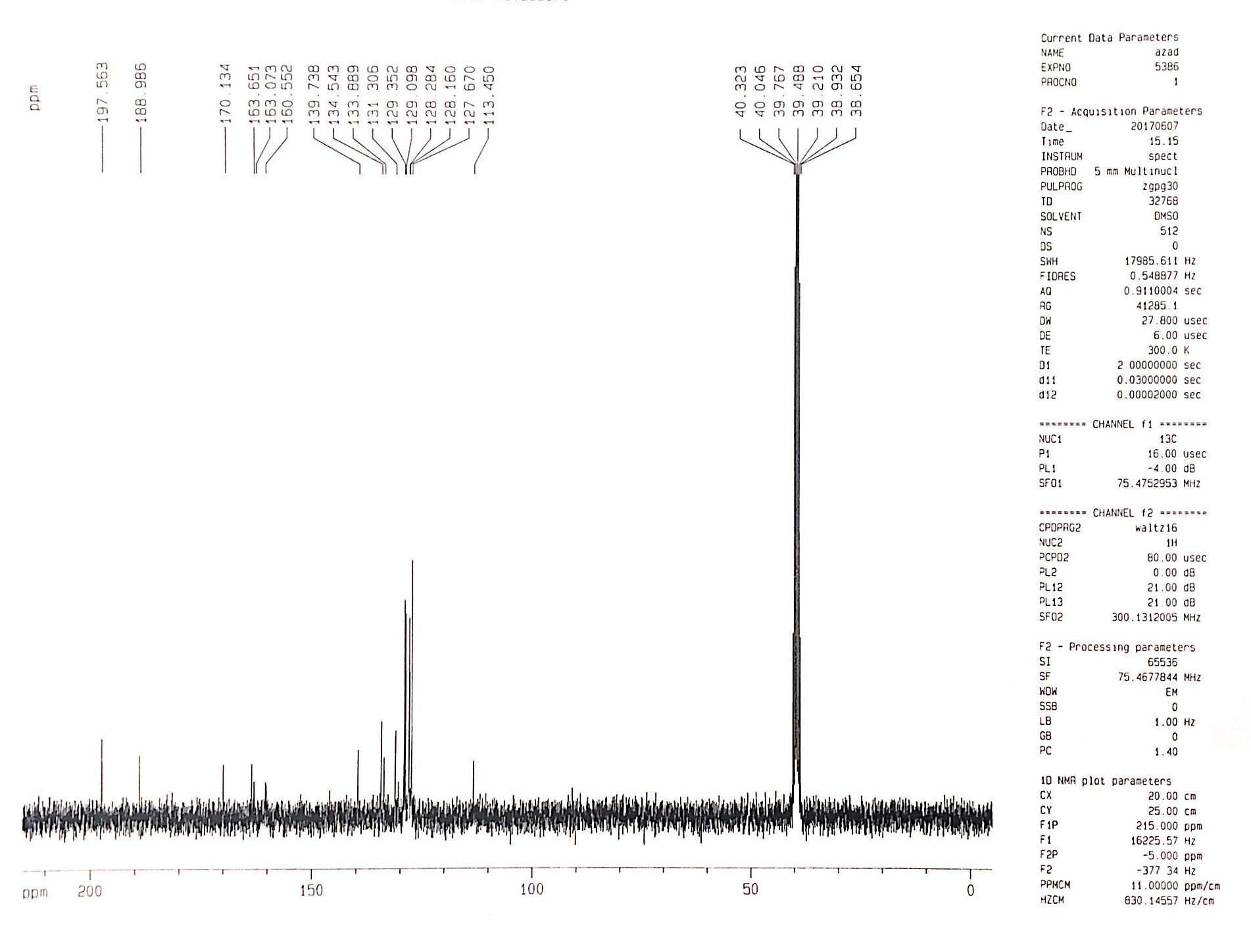
**

**
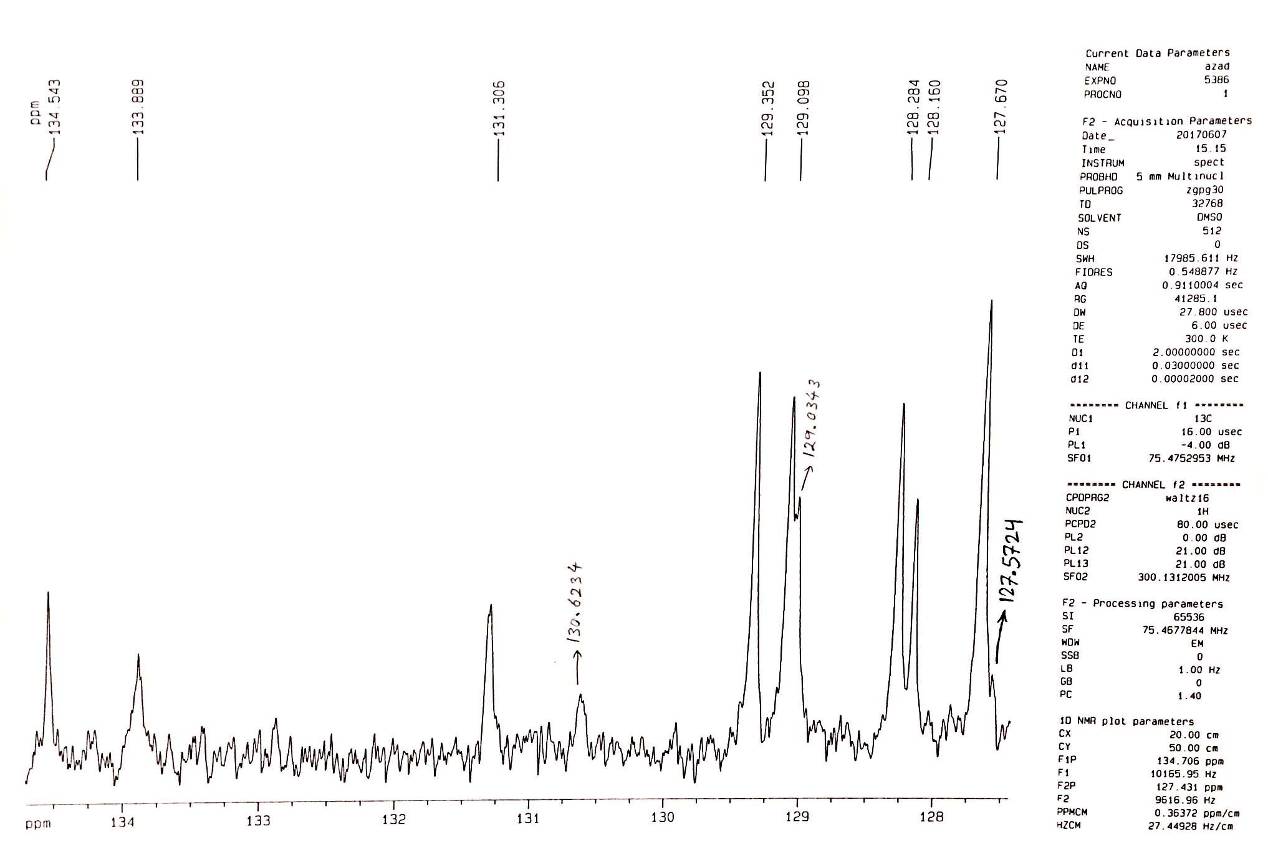
**

**
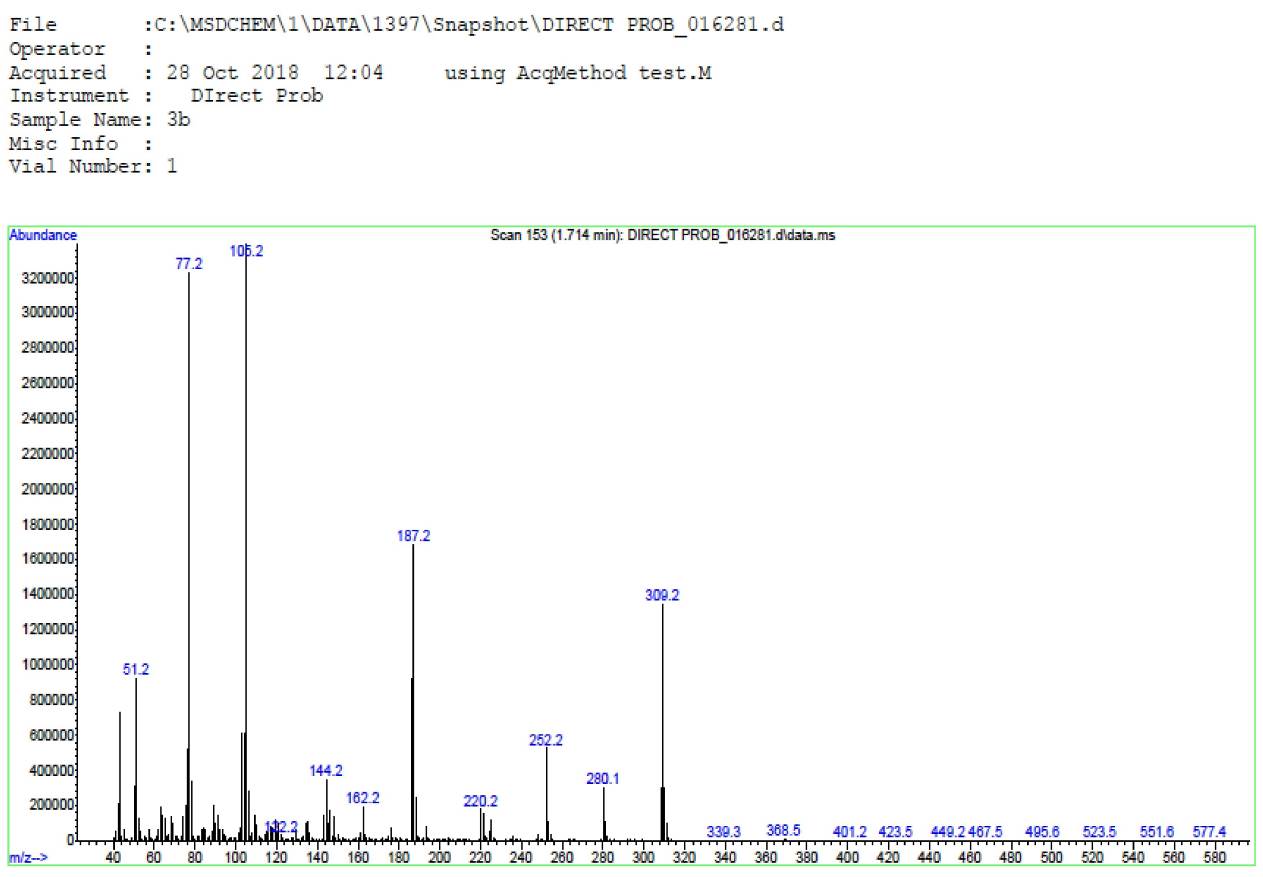
**

**2,4-Bis((2*E*)-2-hydroxy-4-oxo-4-phenyl-3-(*N*-phenylthiocarbamoyl)-2-butenamido)-6-amino-1,3,5-triazine (3c)**


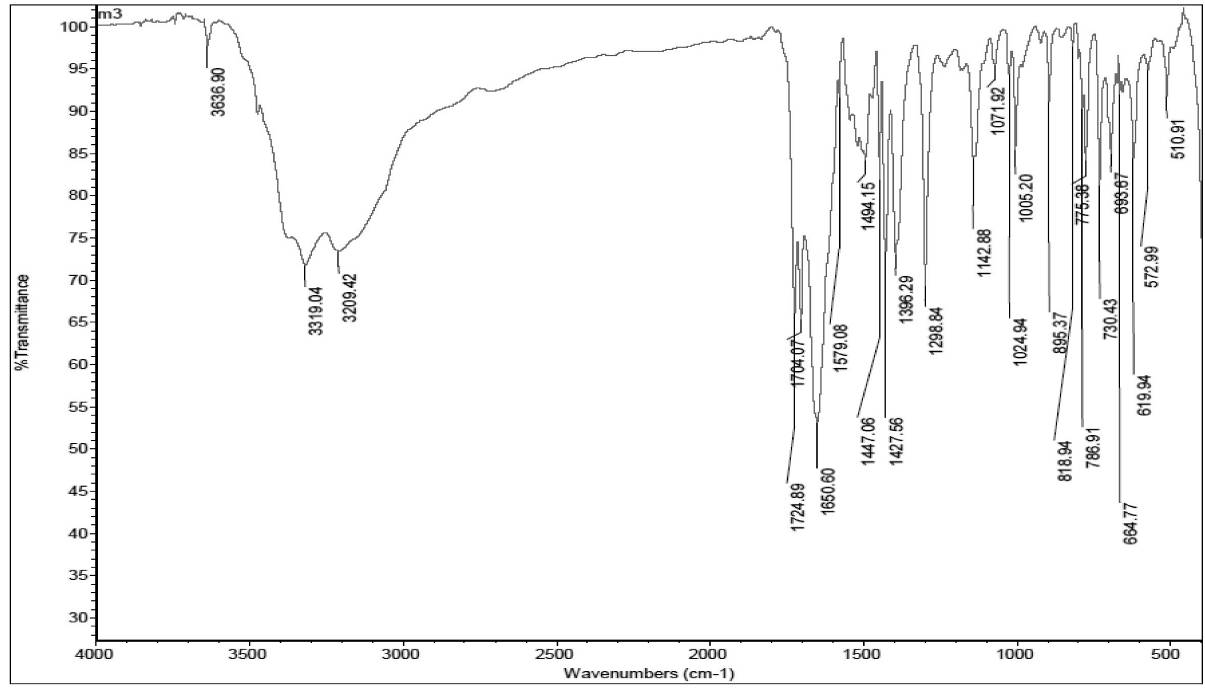


**
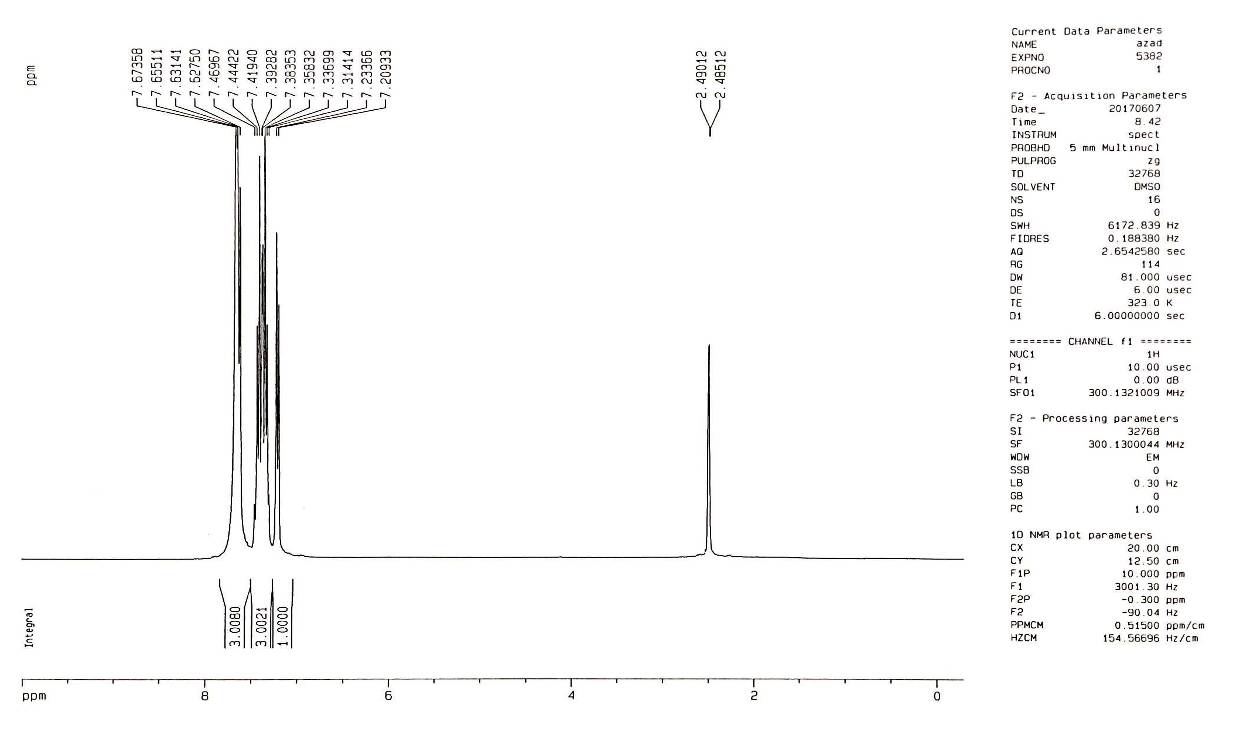
**

**
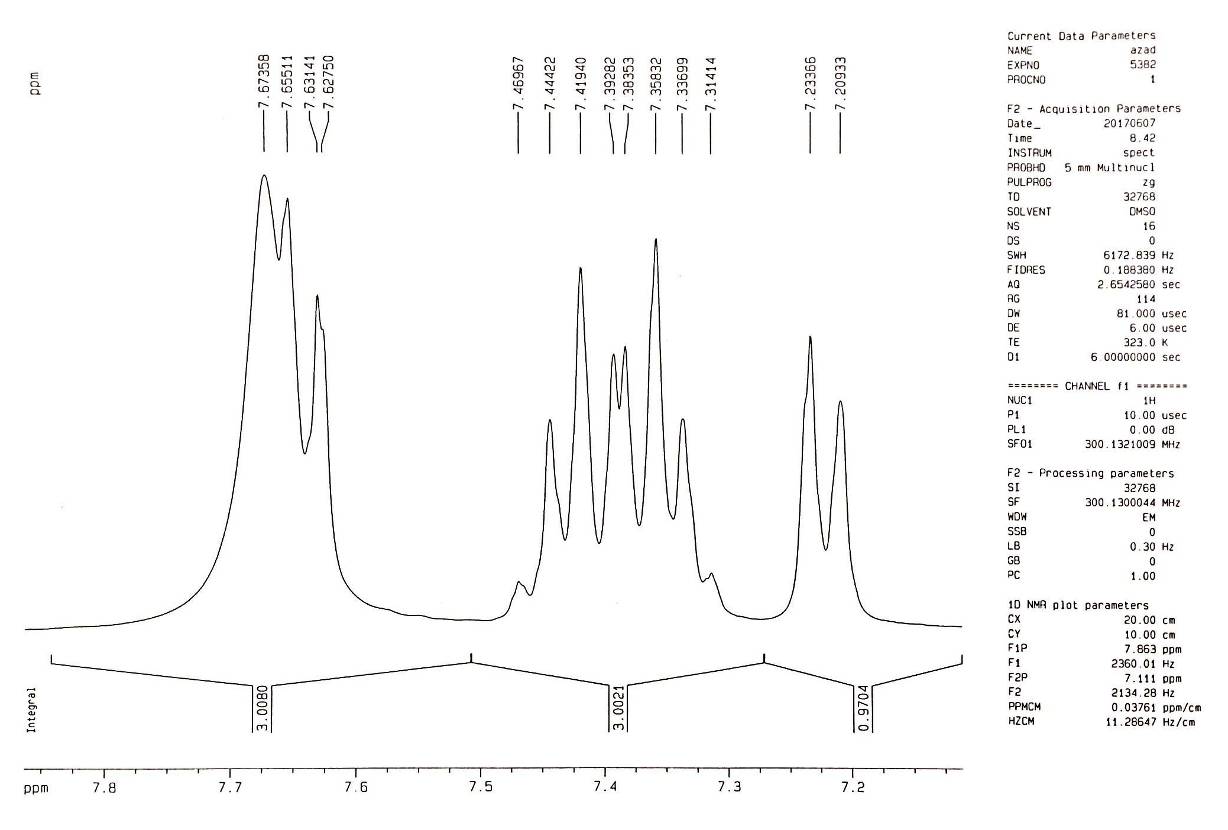
**

**
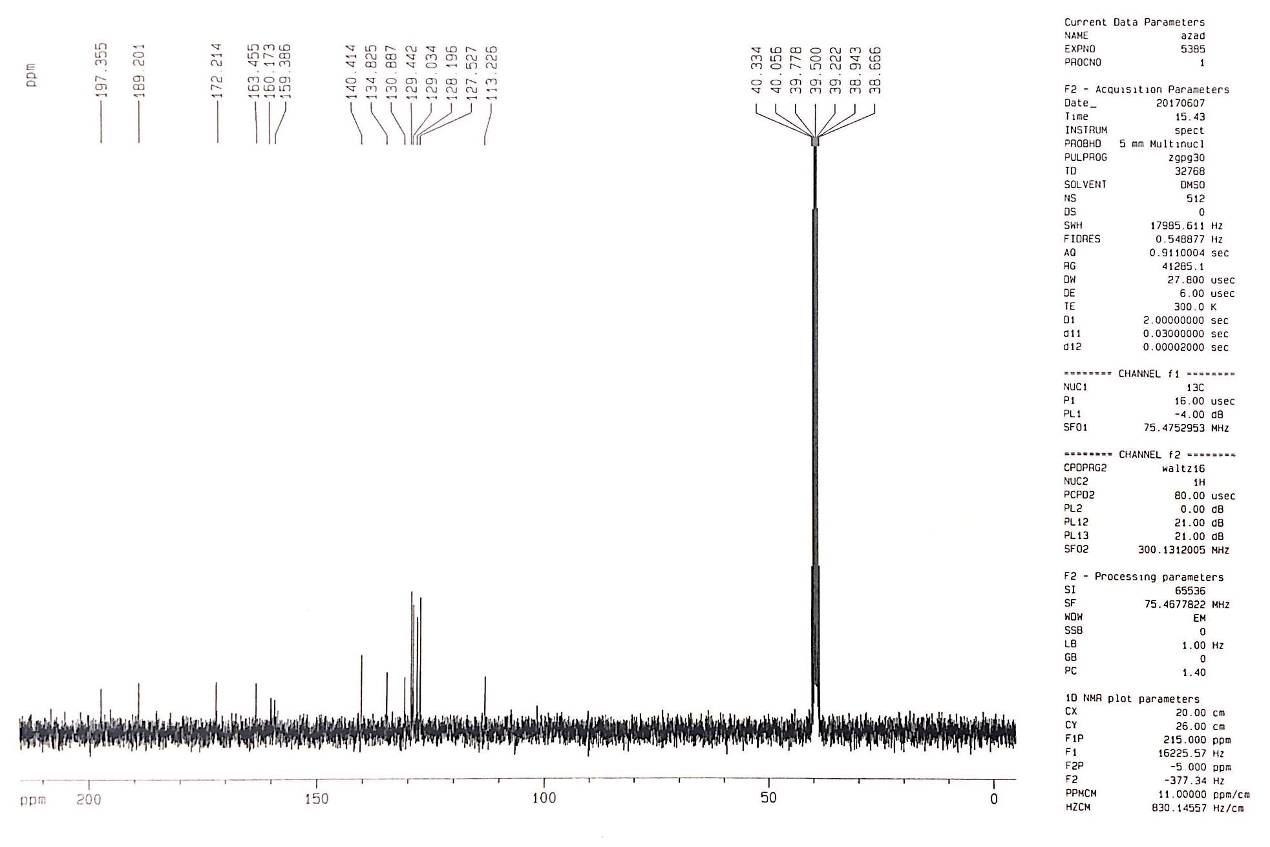
**

**
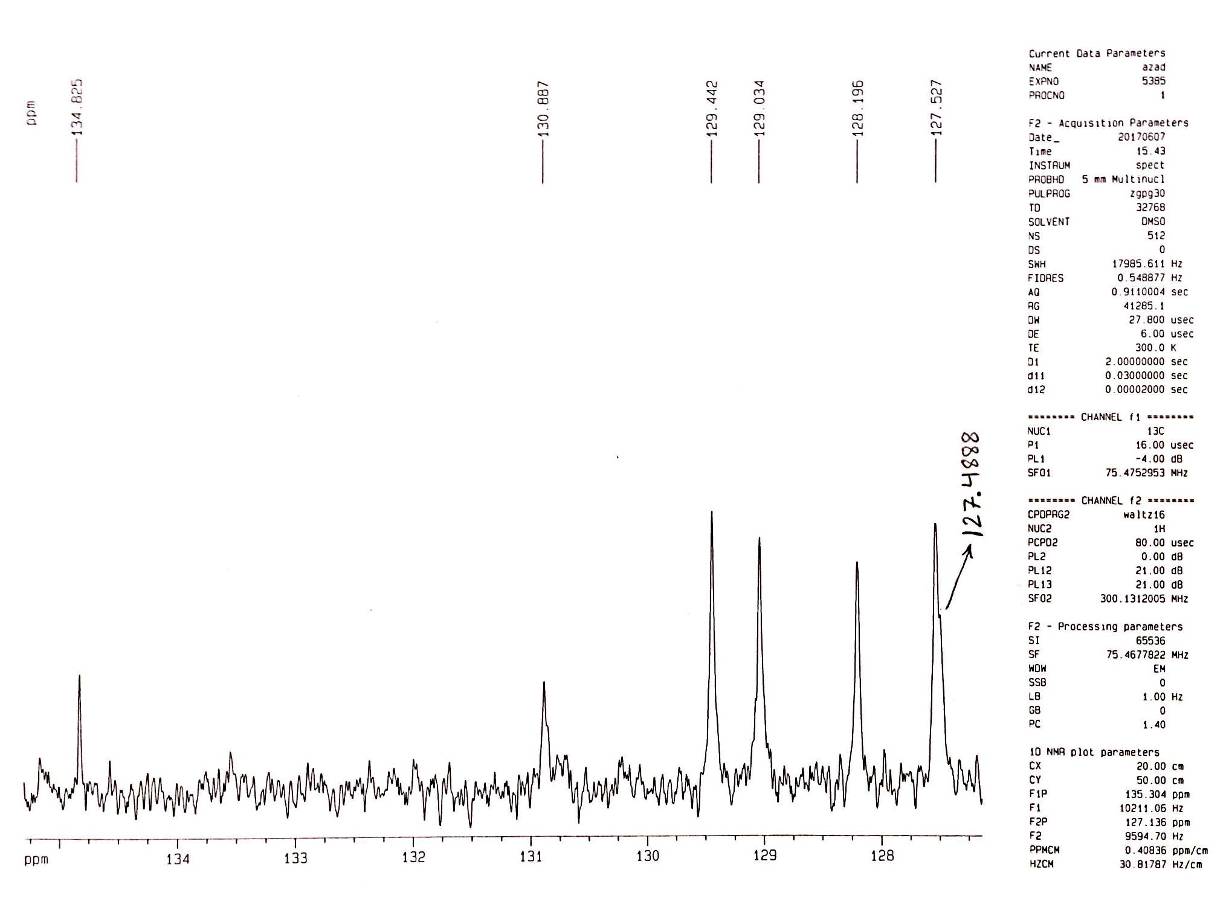
**

**
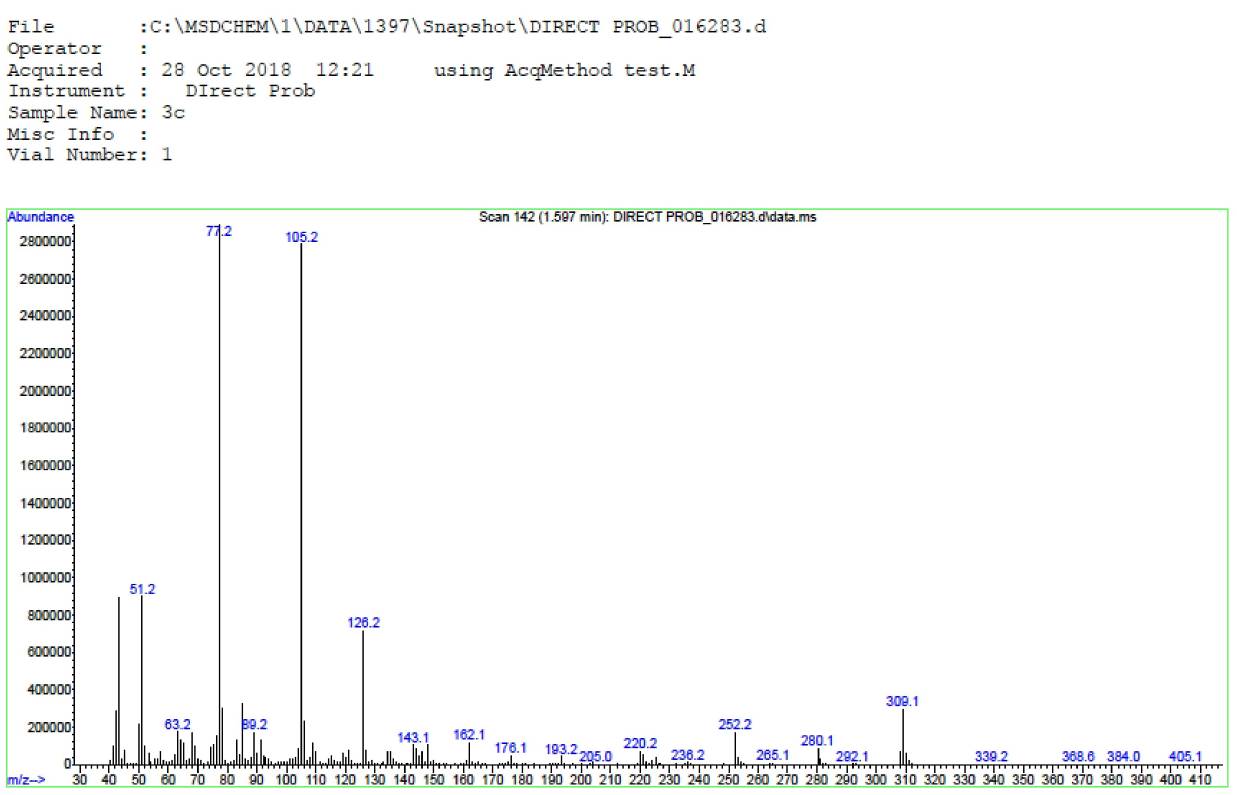
**

**4,6-Bis((2*E*)-2-hydroxy-4-oxo-4-phenyl-3-(*N*-phenylthiocarbamoyl)-2-butenamido)-2-mercaptopyrimidie (3d)**


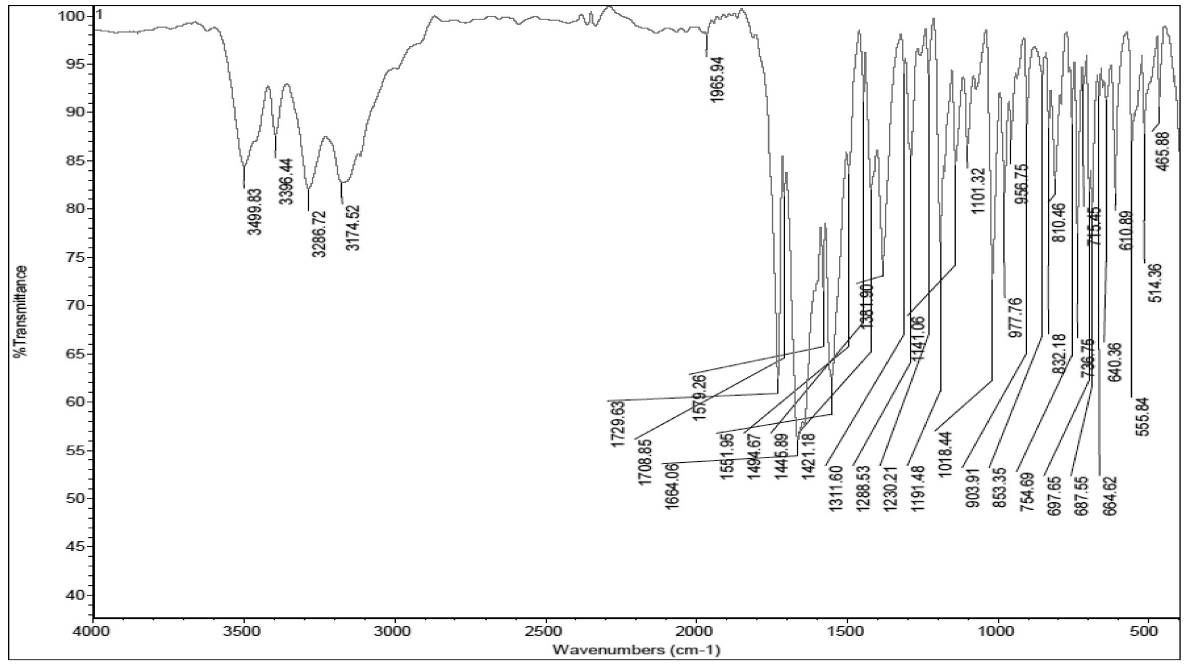
**
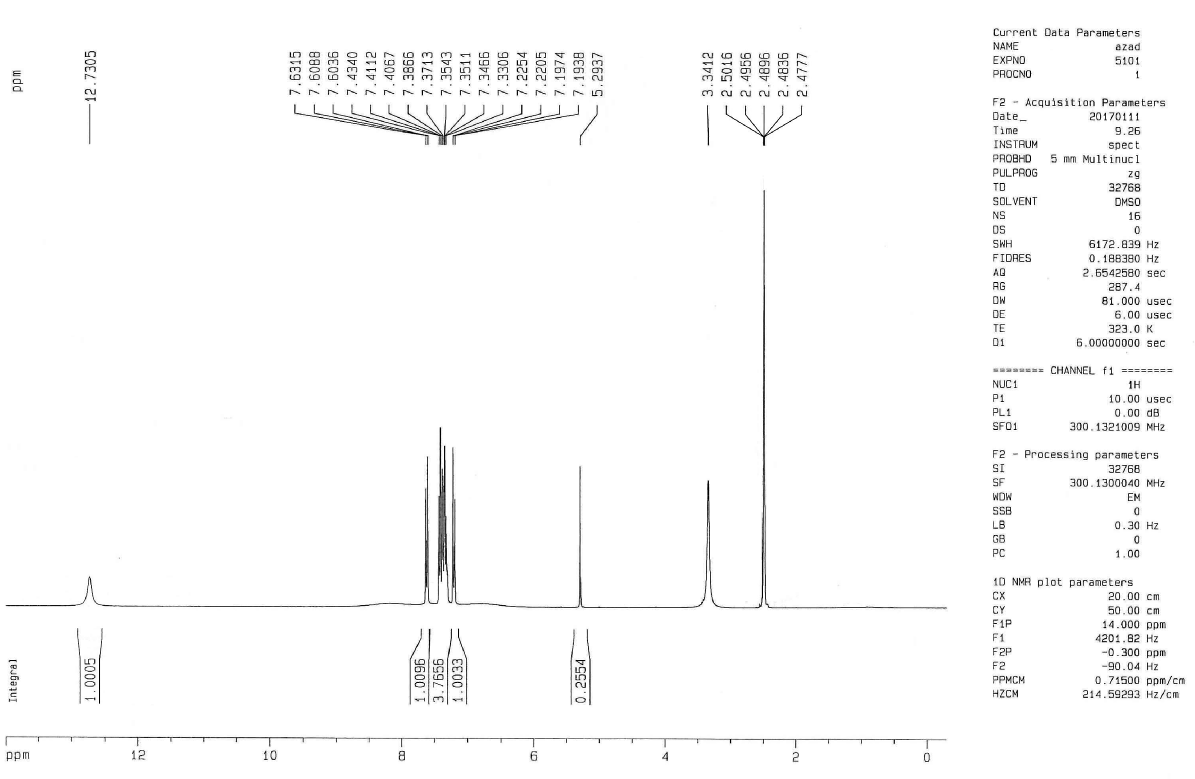
**

**
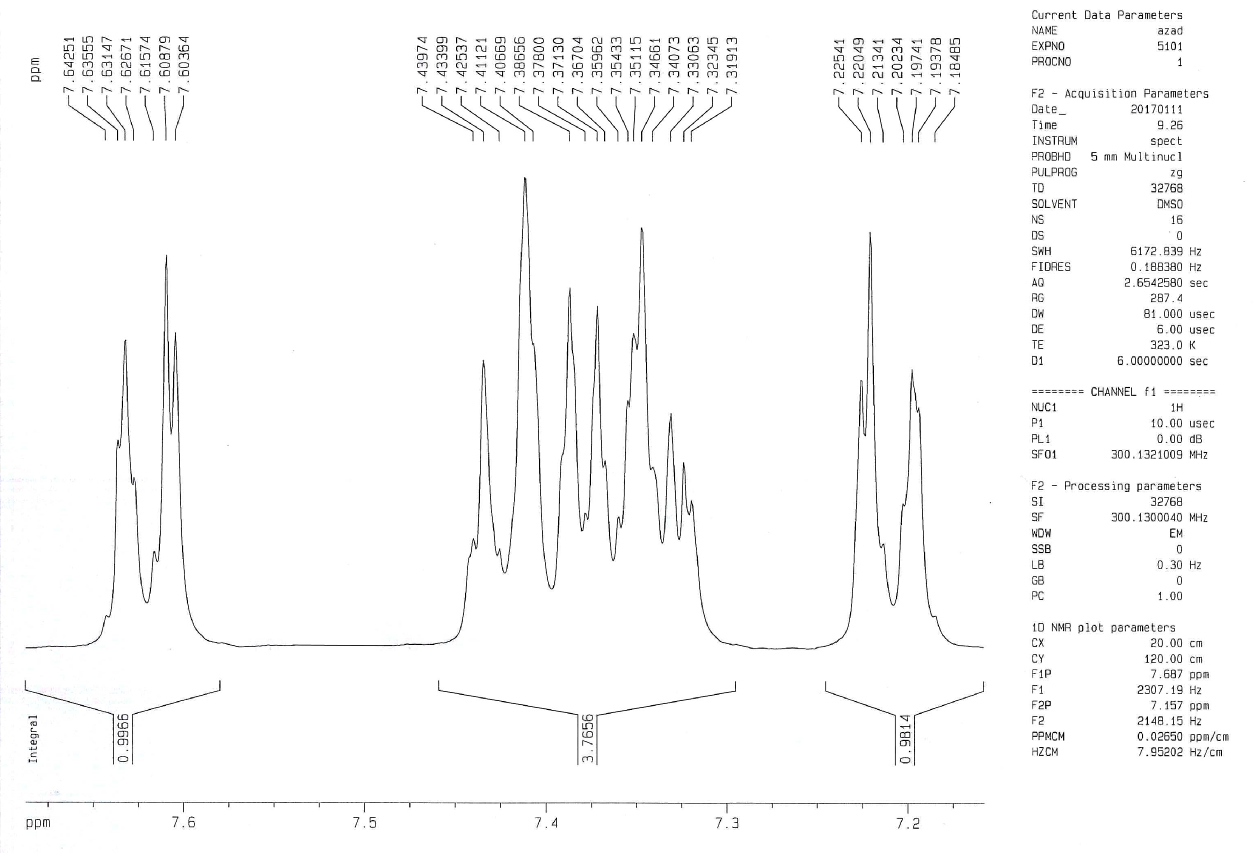
**

**
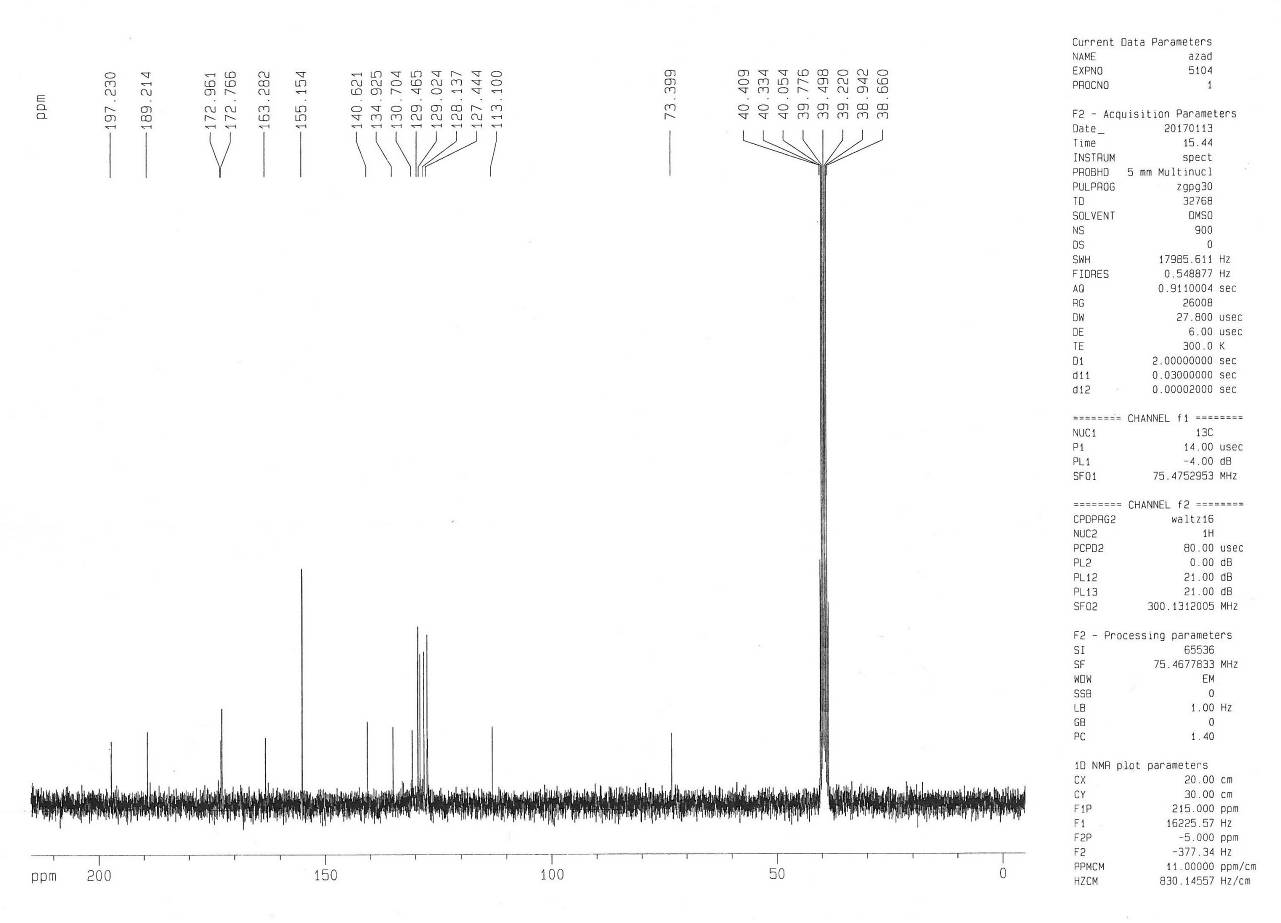
**

**
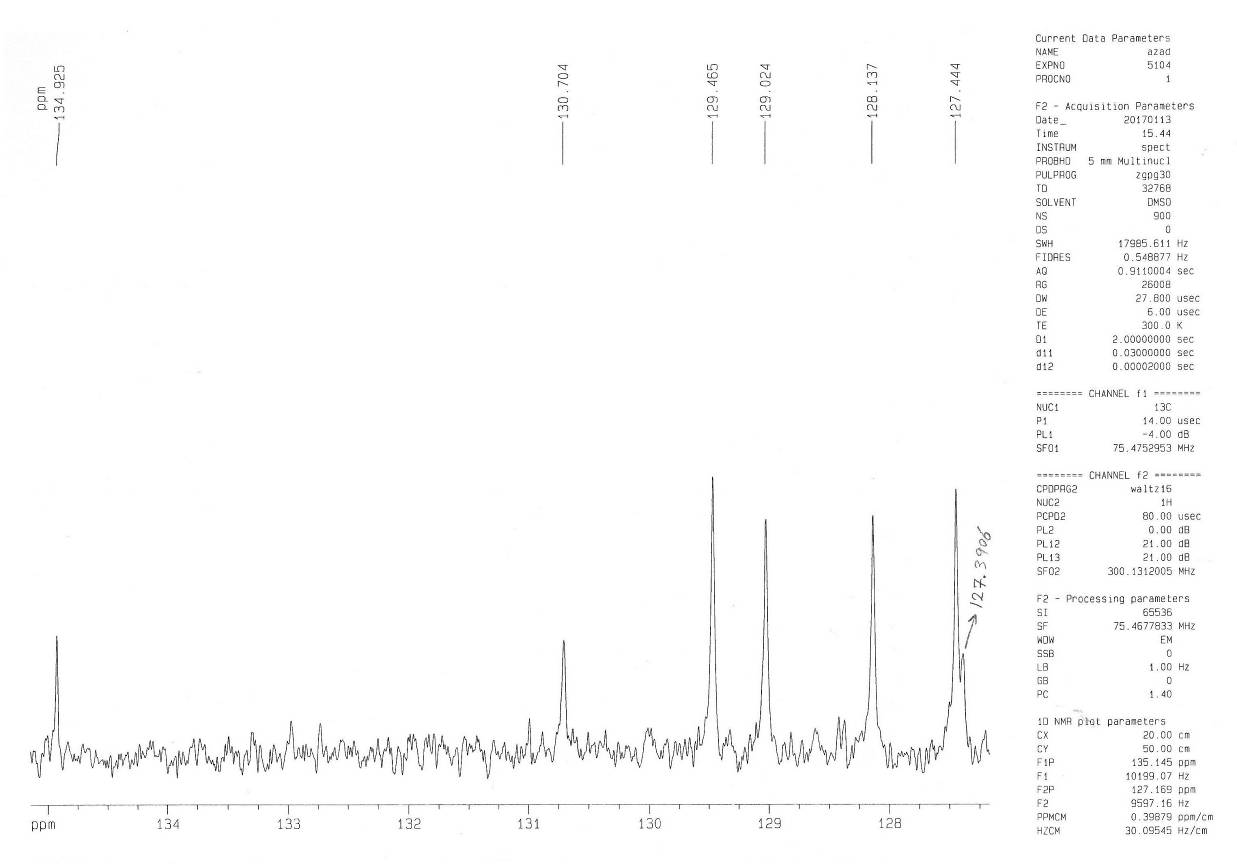
**

**
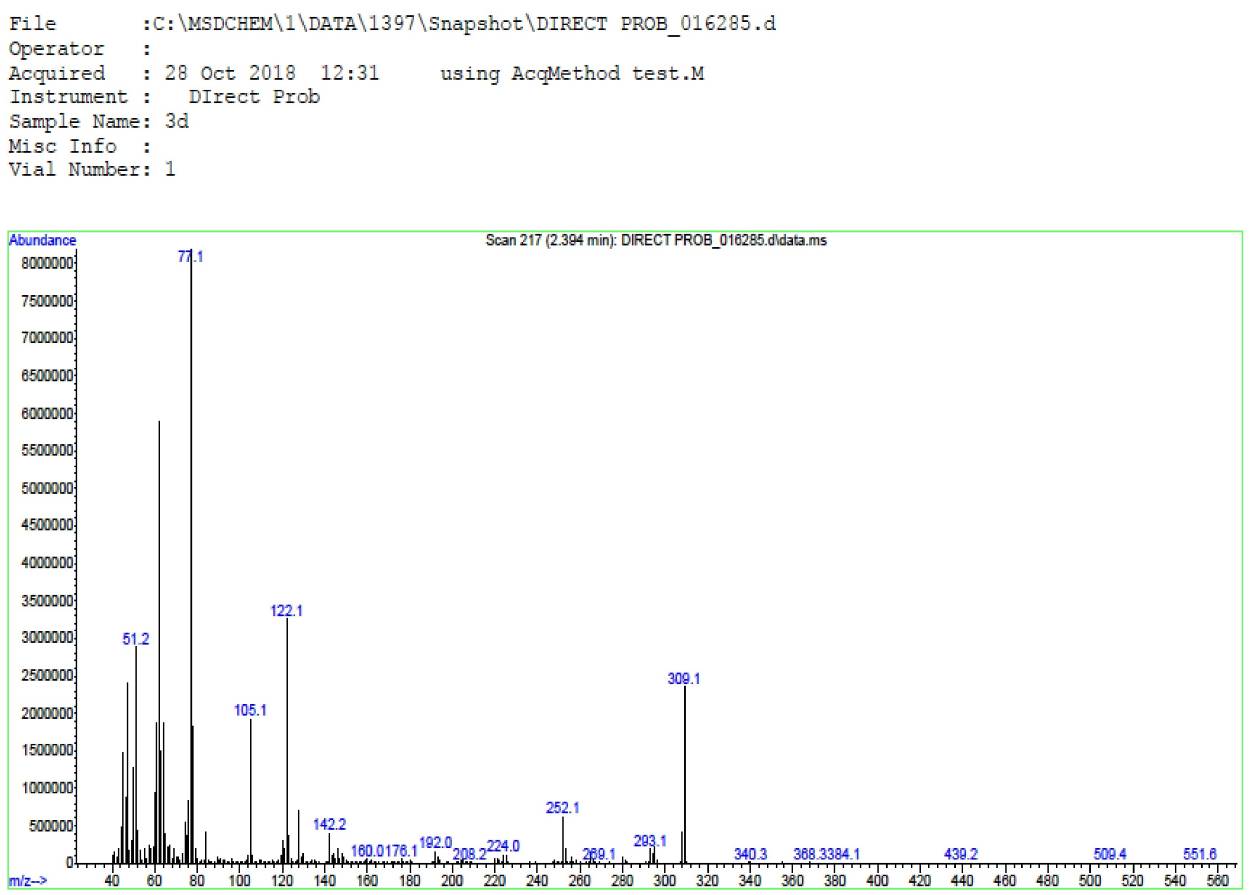
**

**4,4′-Bis((2*E*)-2-hydroxy-4-oxo-4-phenyl-3-(*N*-phenylthiocarbamoyl)-2-butenamido) biphenylsulfone (3e)**


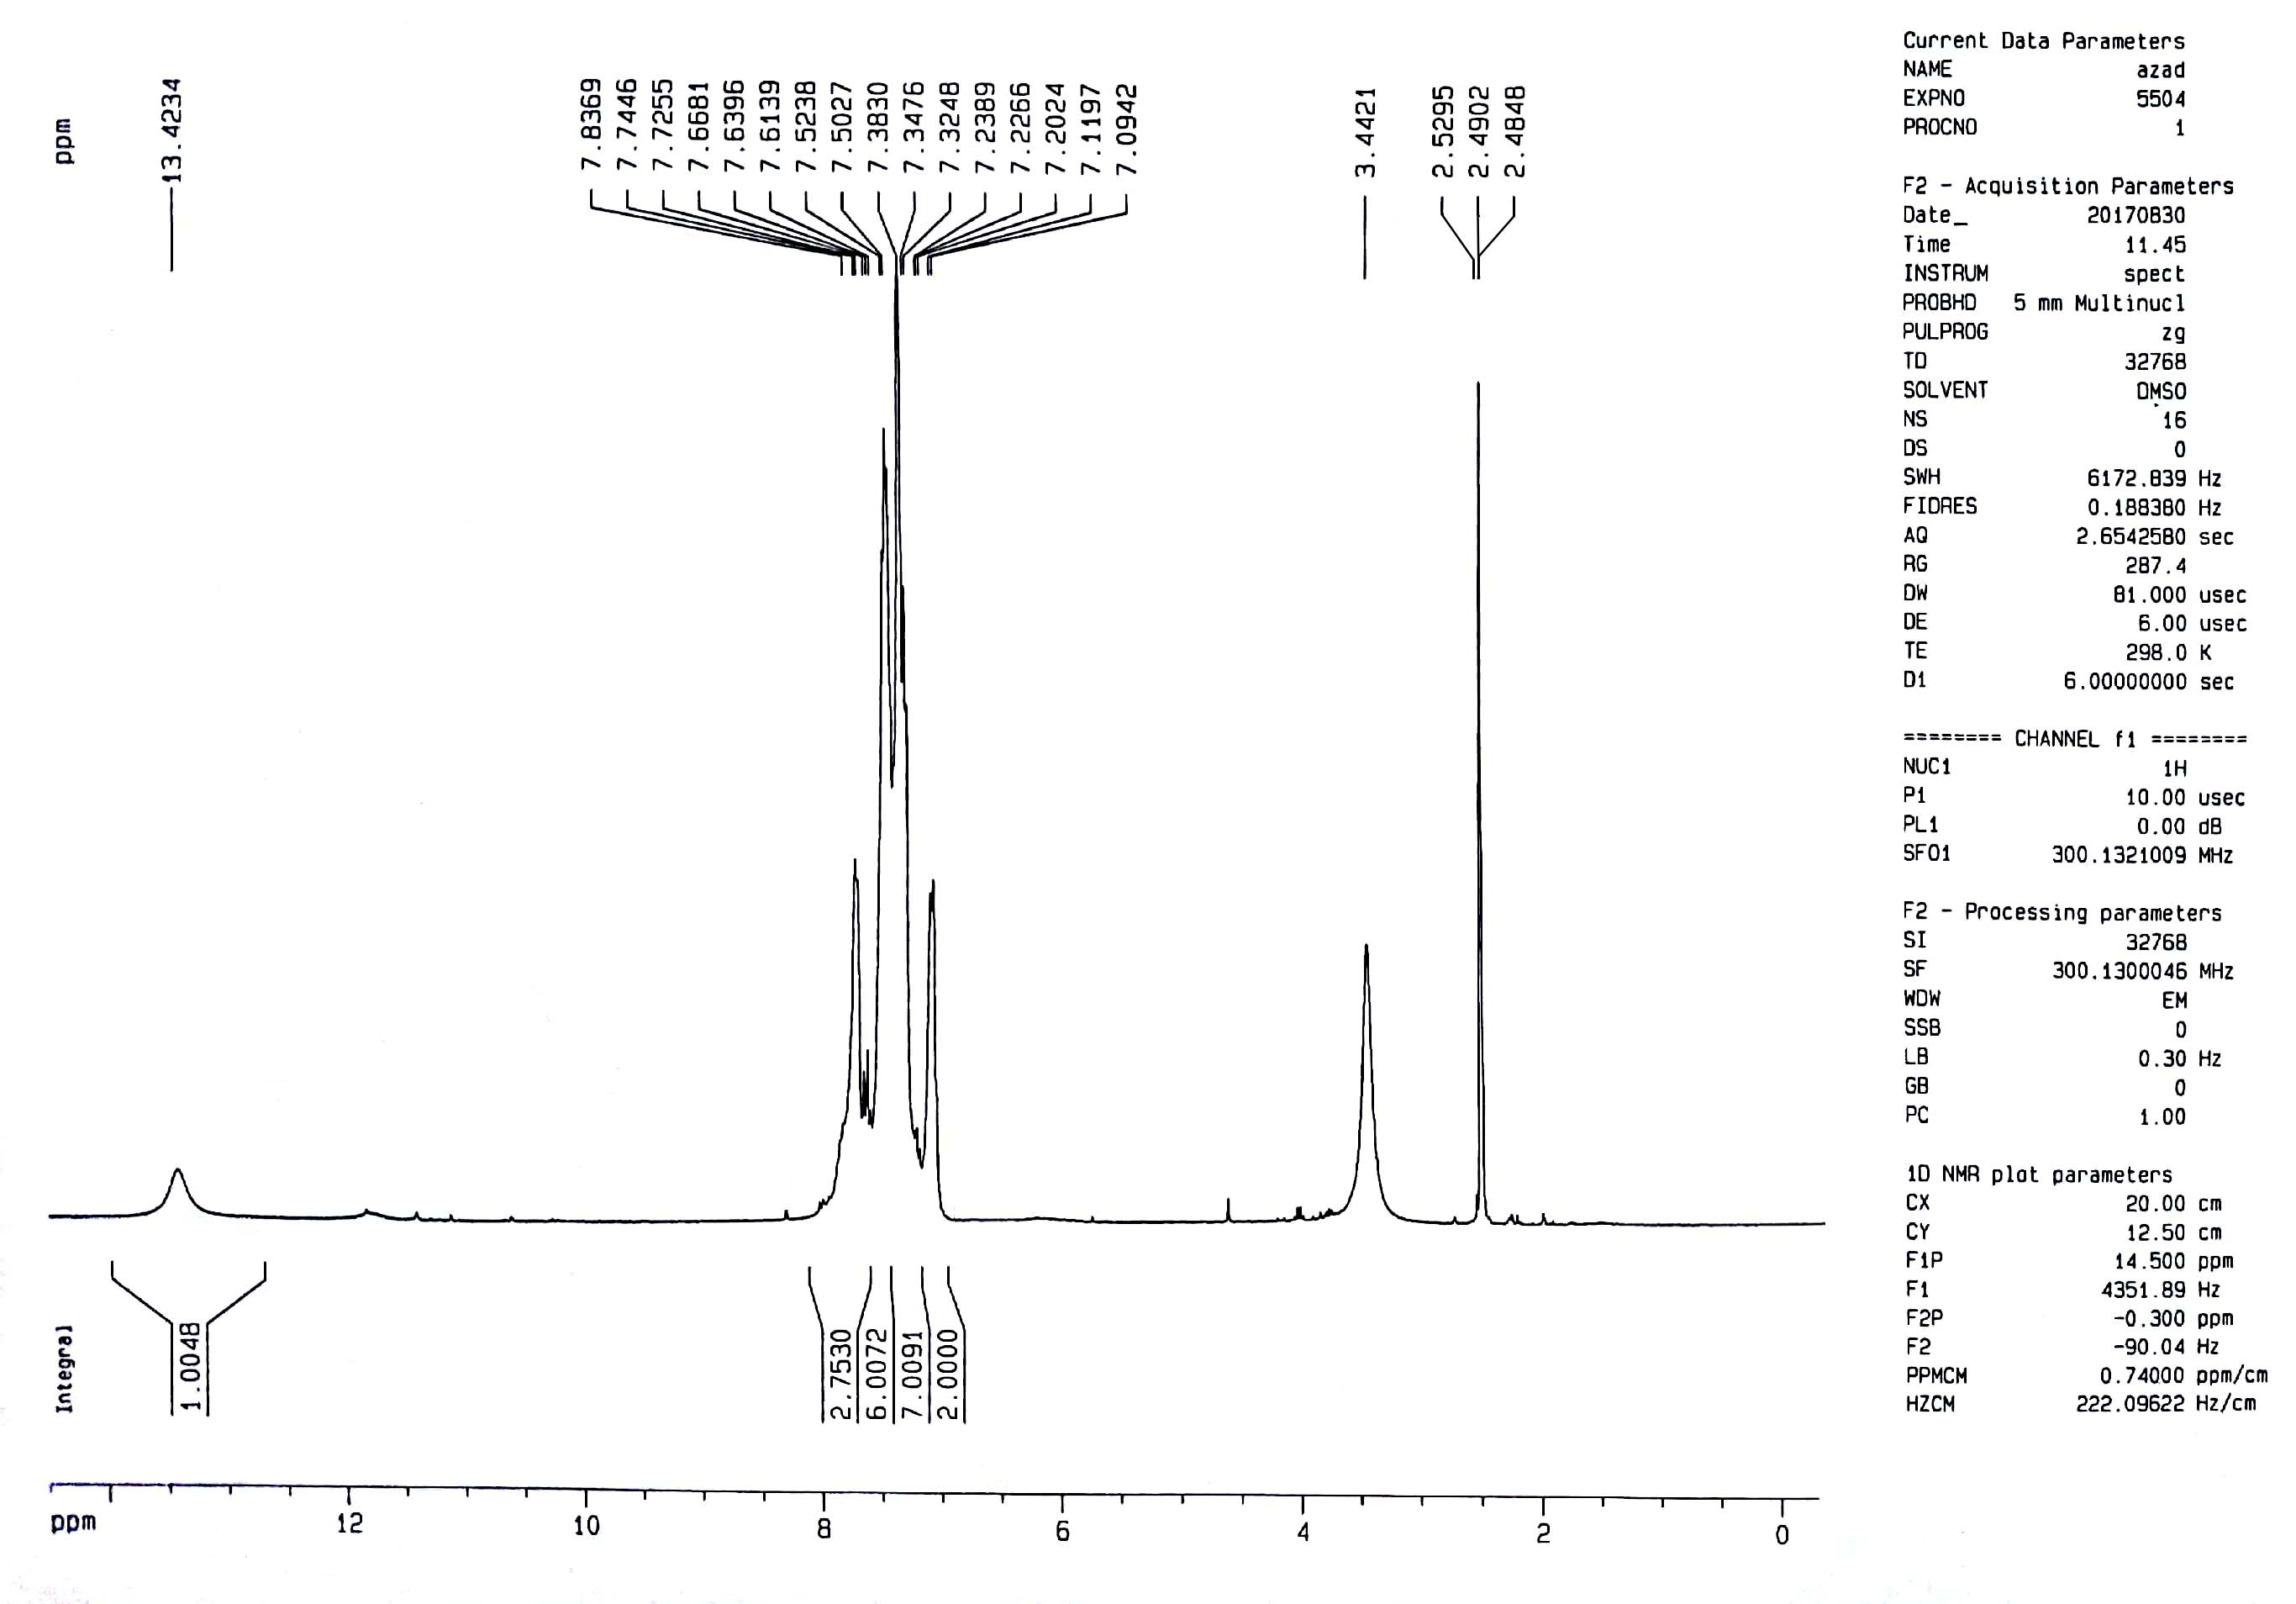


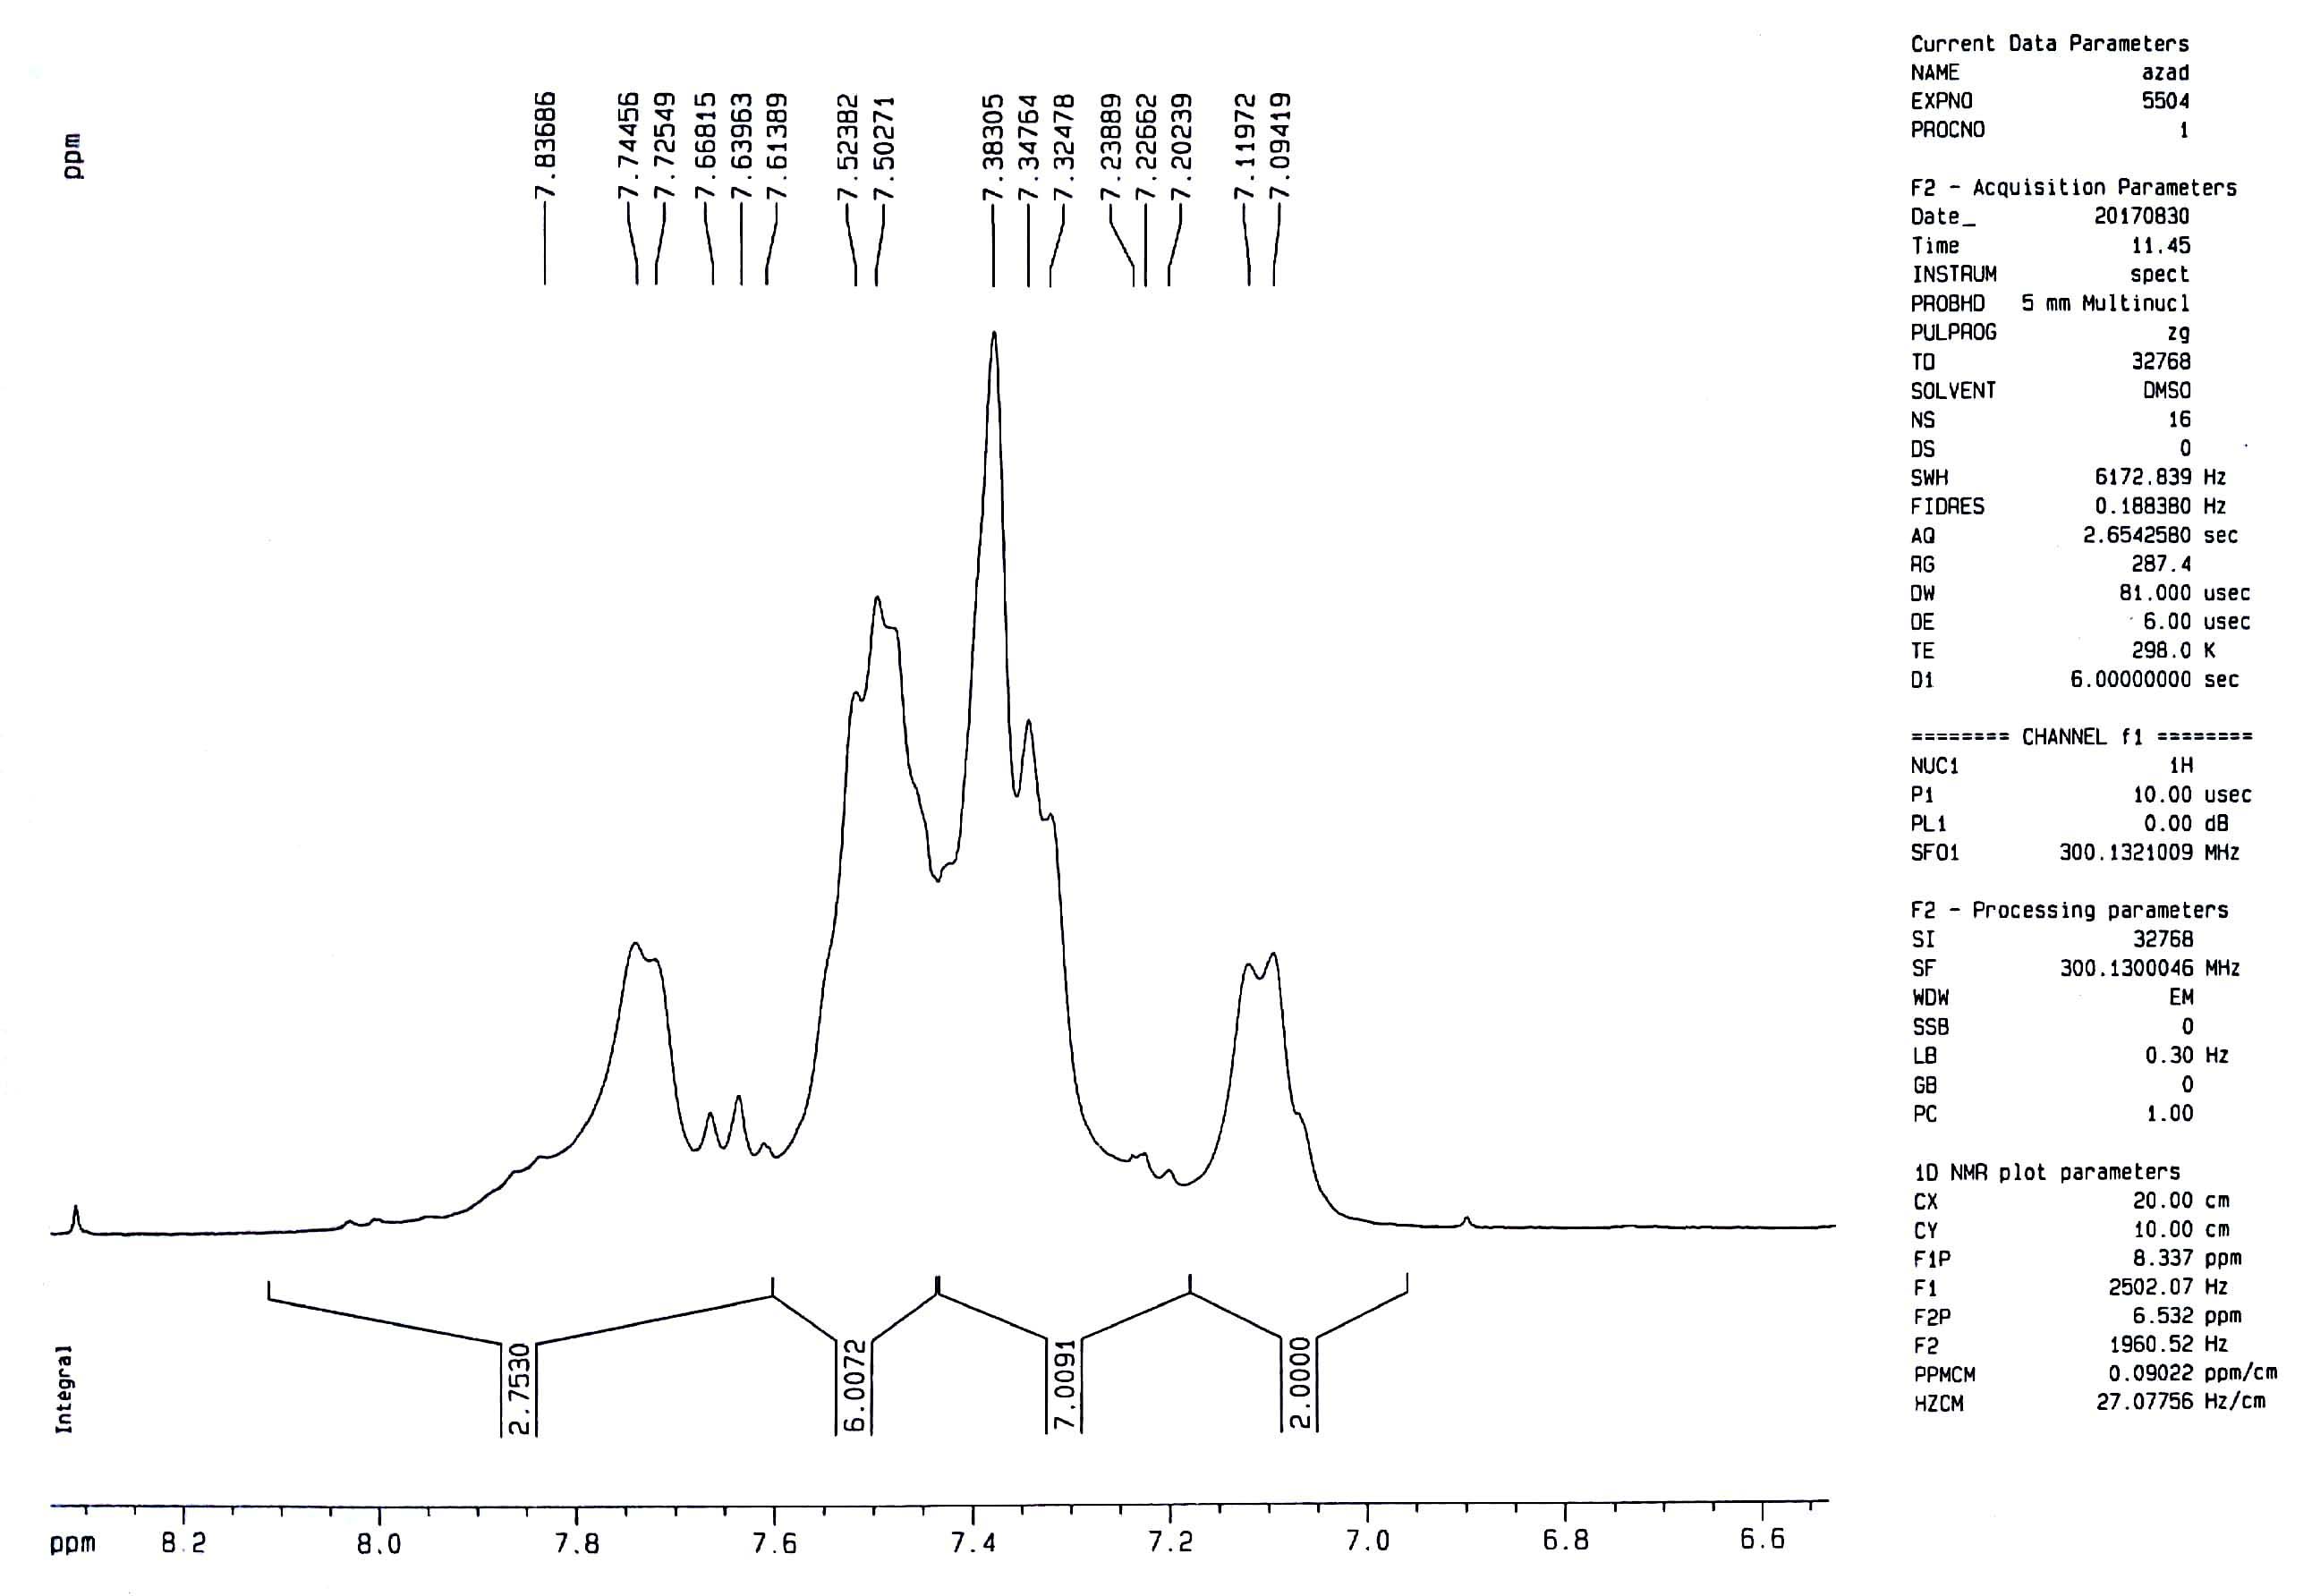


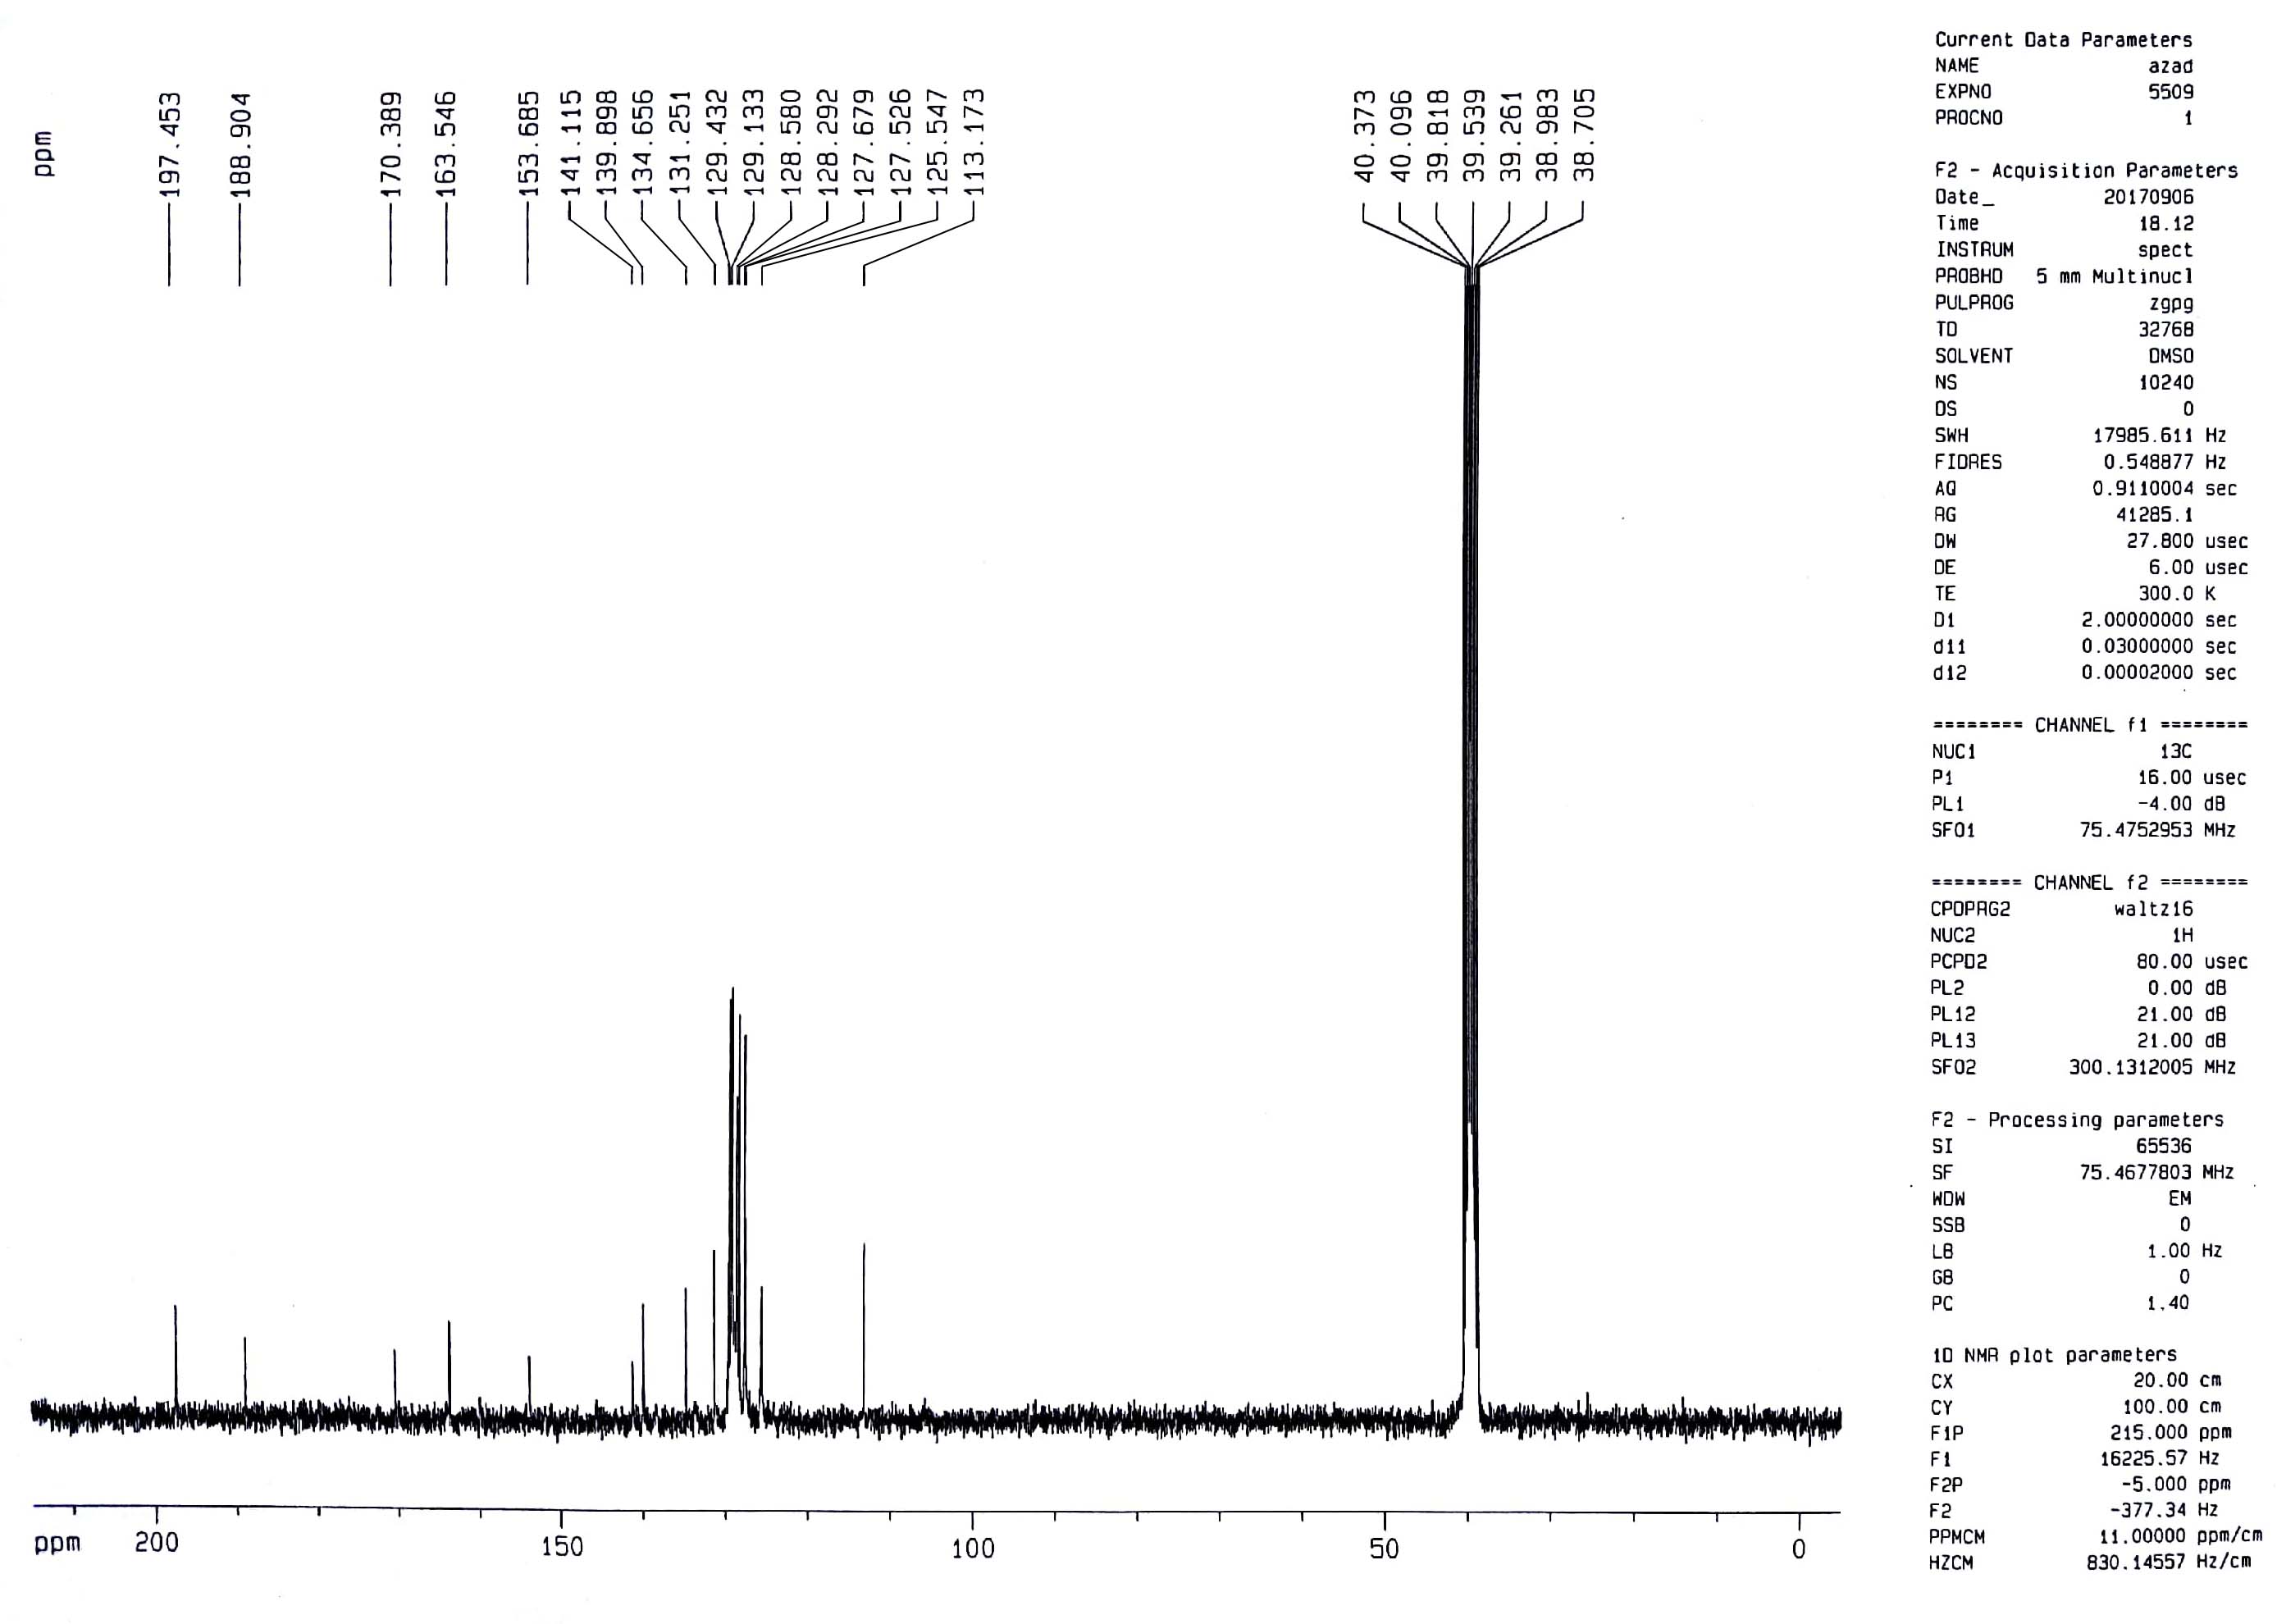


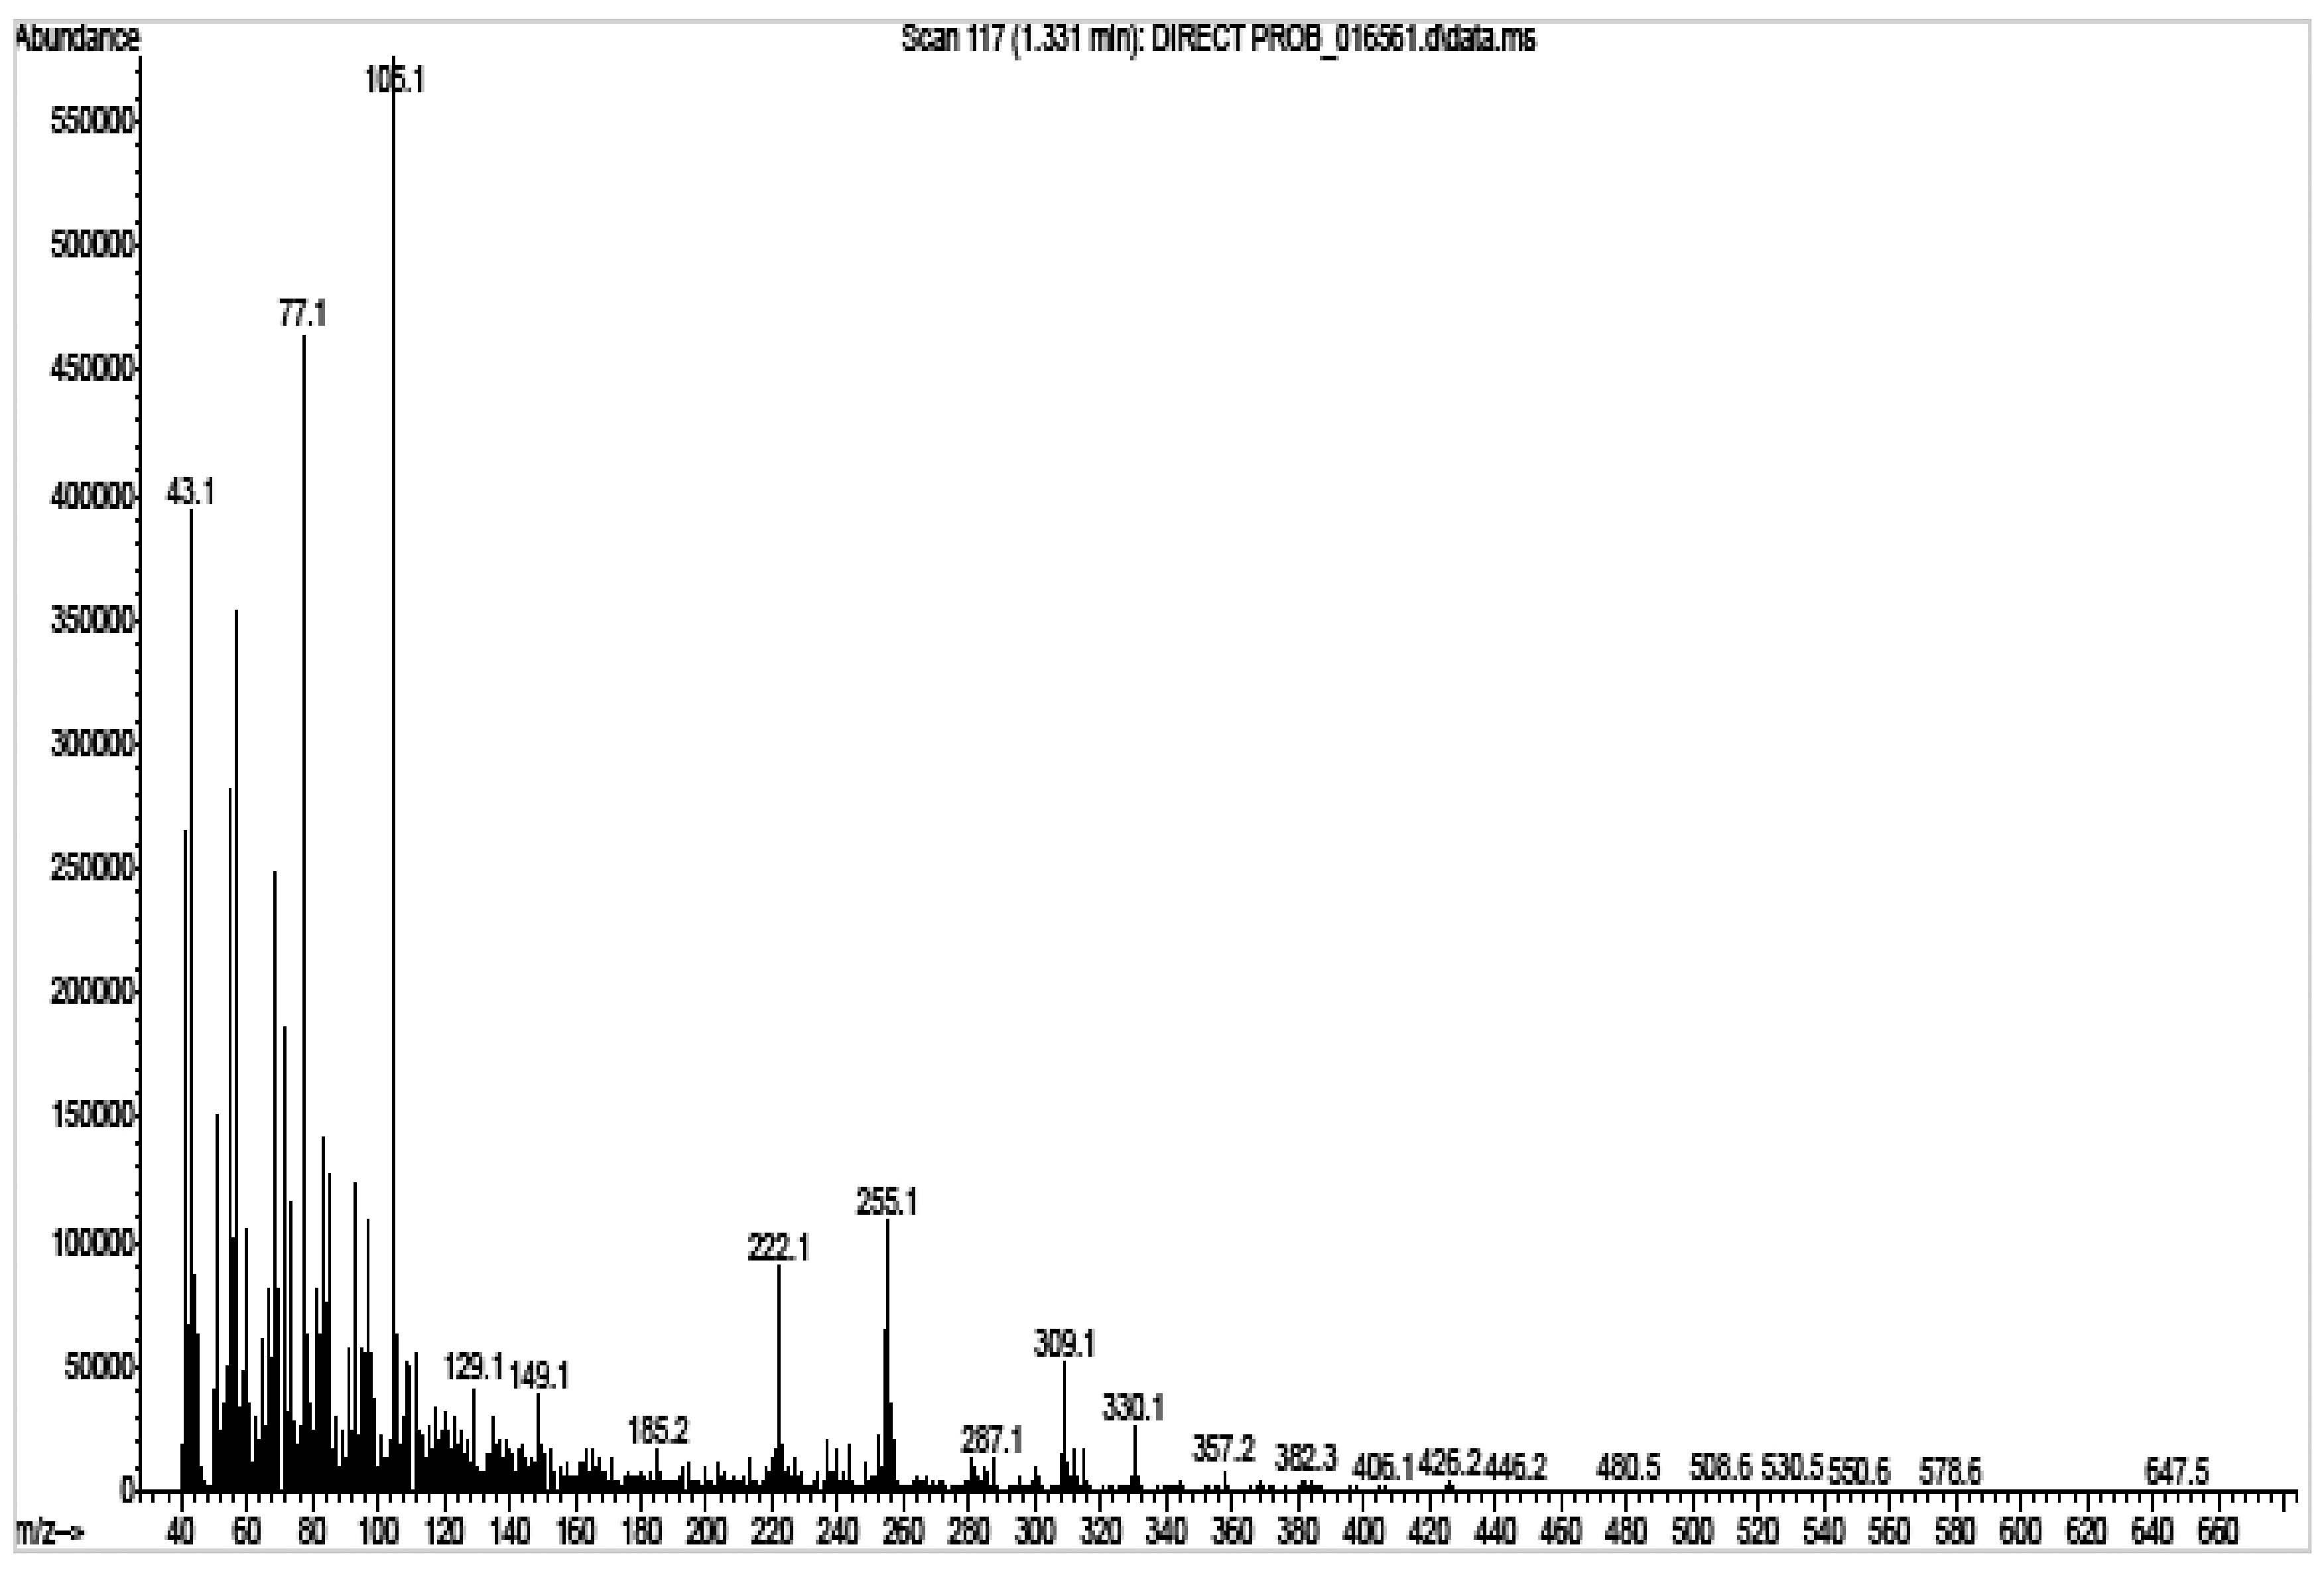


**(2*E*)-*N*-Hydroxy-2-hydroxy-4-oxo-4-phenyl-3-(*N*-phenylthiocarbamoyl)-2-butenamide (4a)**


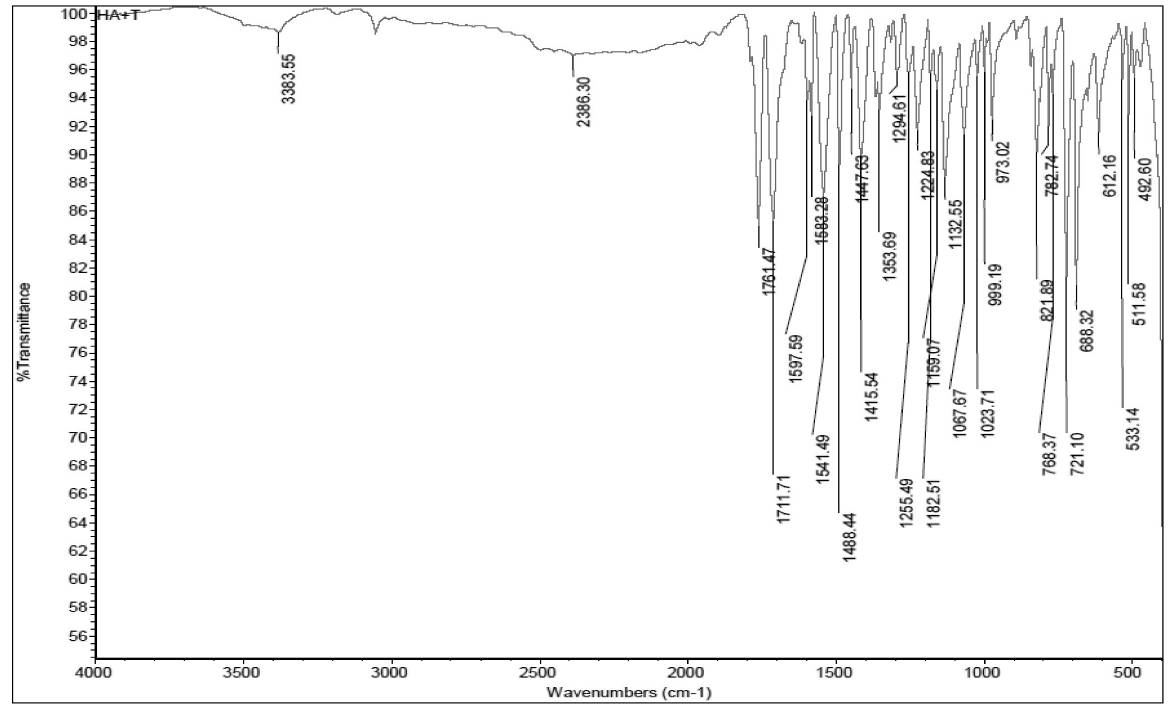


**
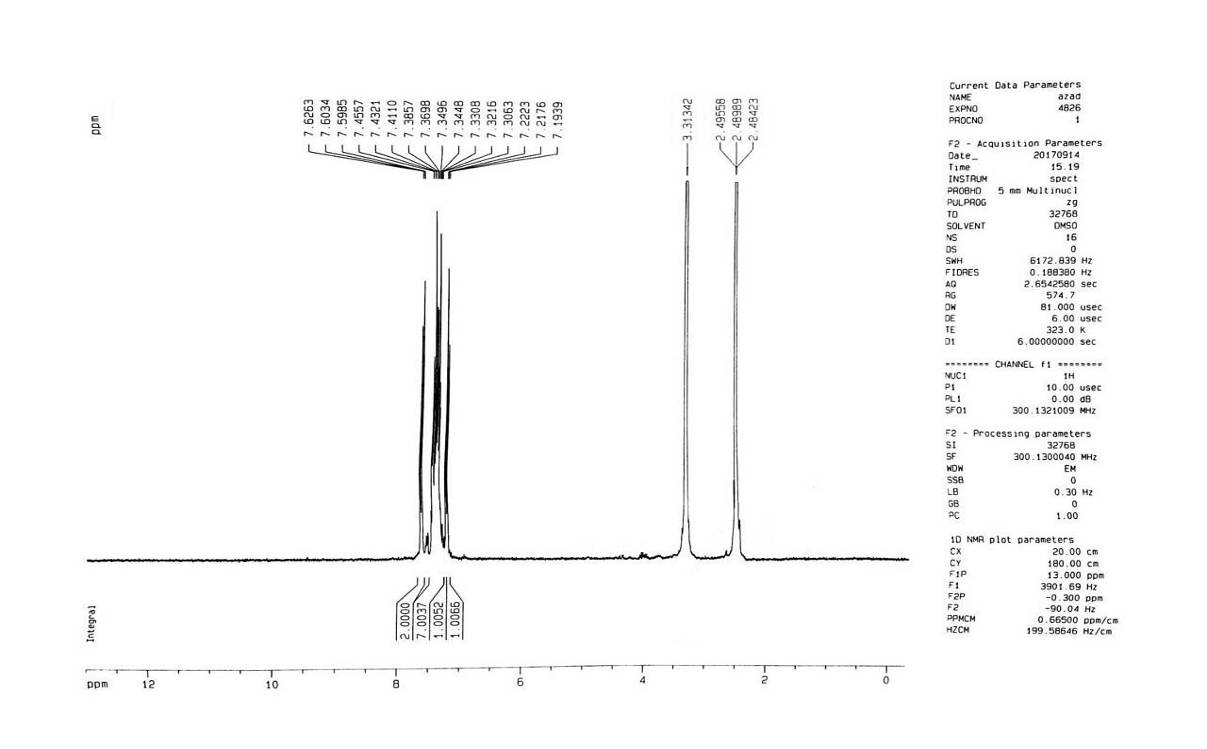
**

**
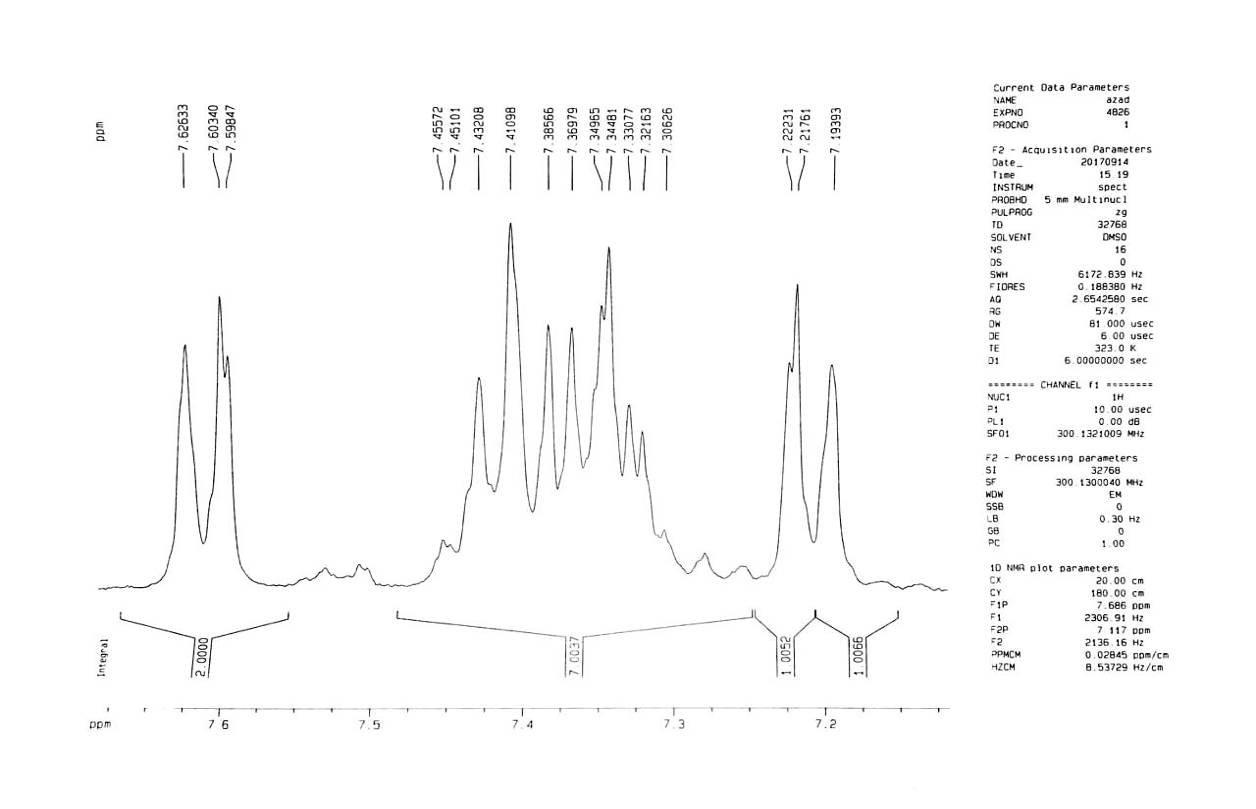
**

**
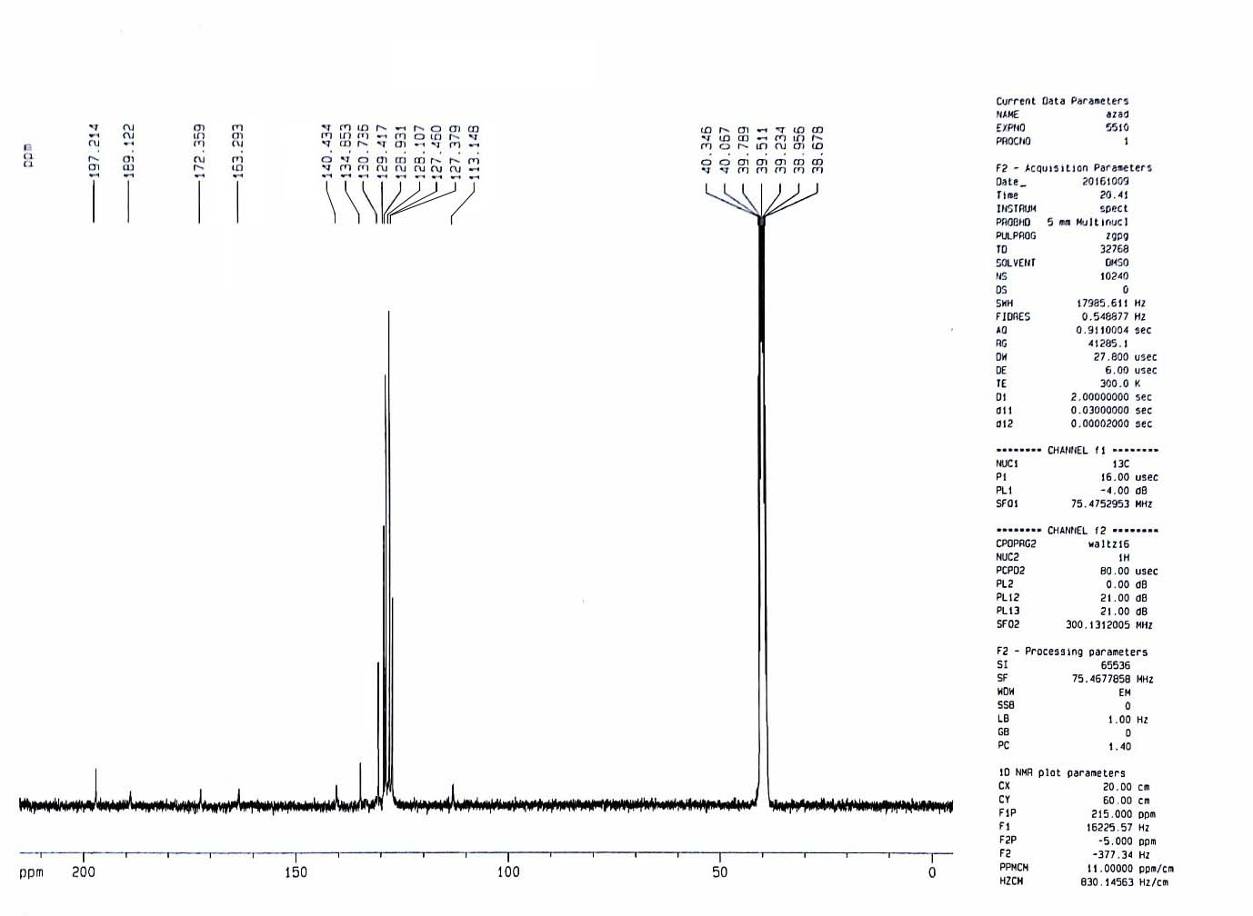
**

**
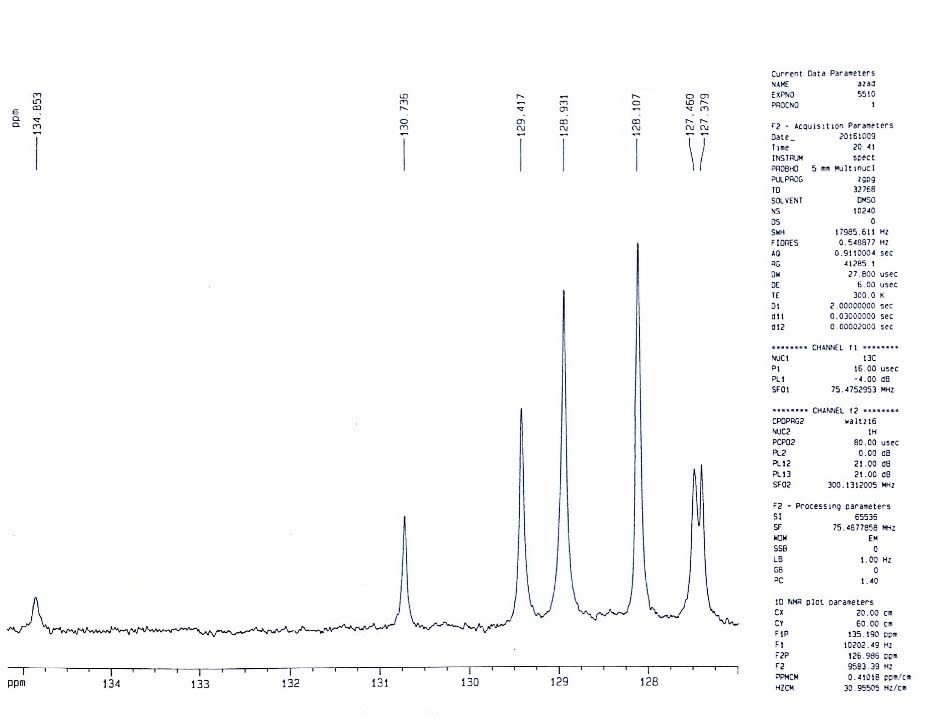
**

**
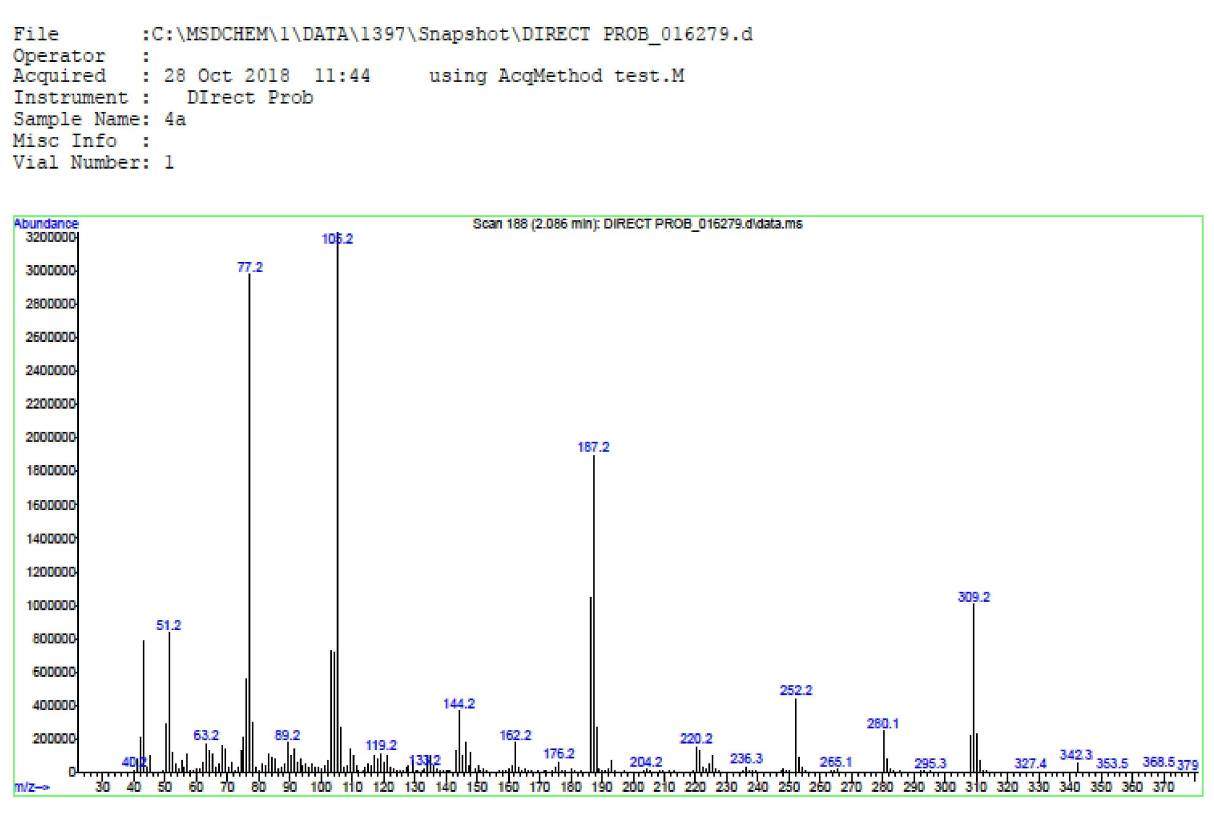
**

**(2*E*)-*N*-1-Phenylethyl-2-hydroxy-4-oxo-4-phenyl-3-(*N*-phenylthiocarbamoyl)-2-butenamide (4b)**

**
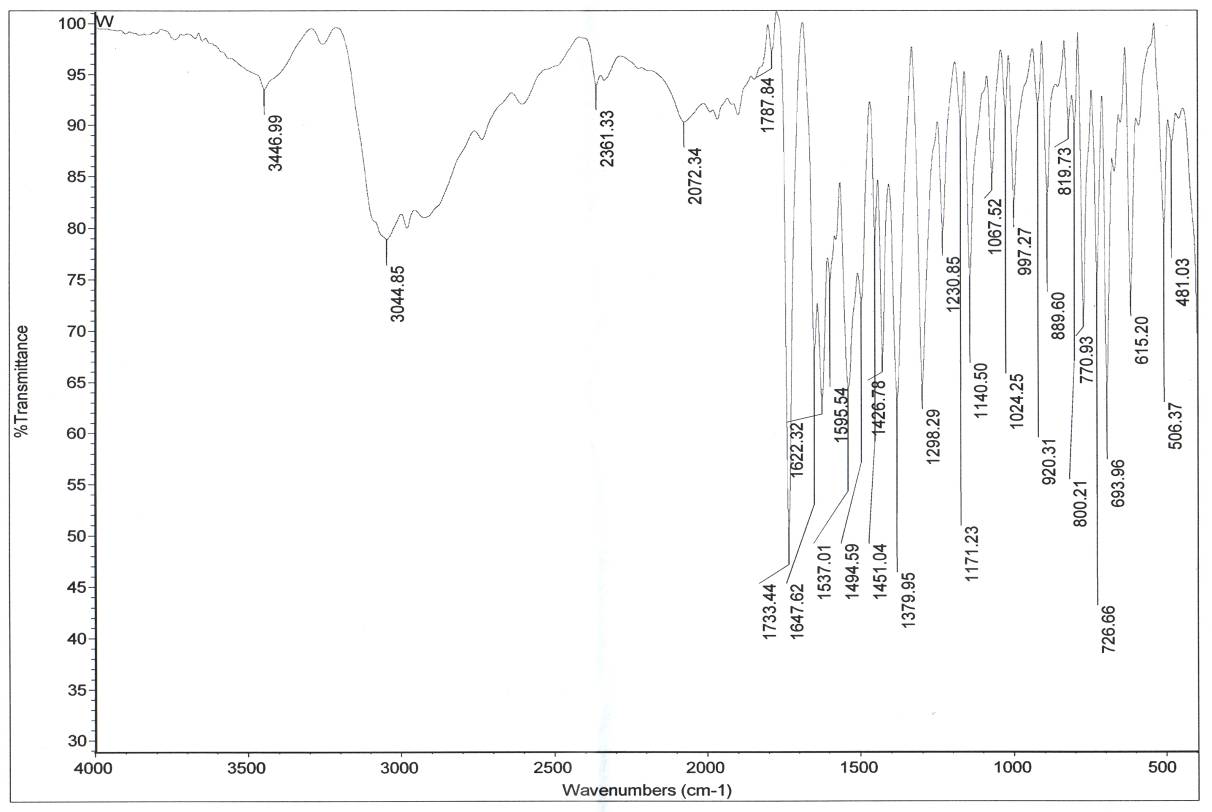
**


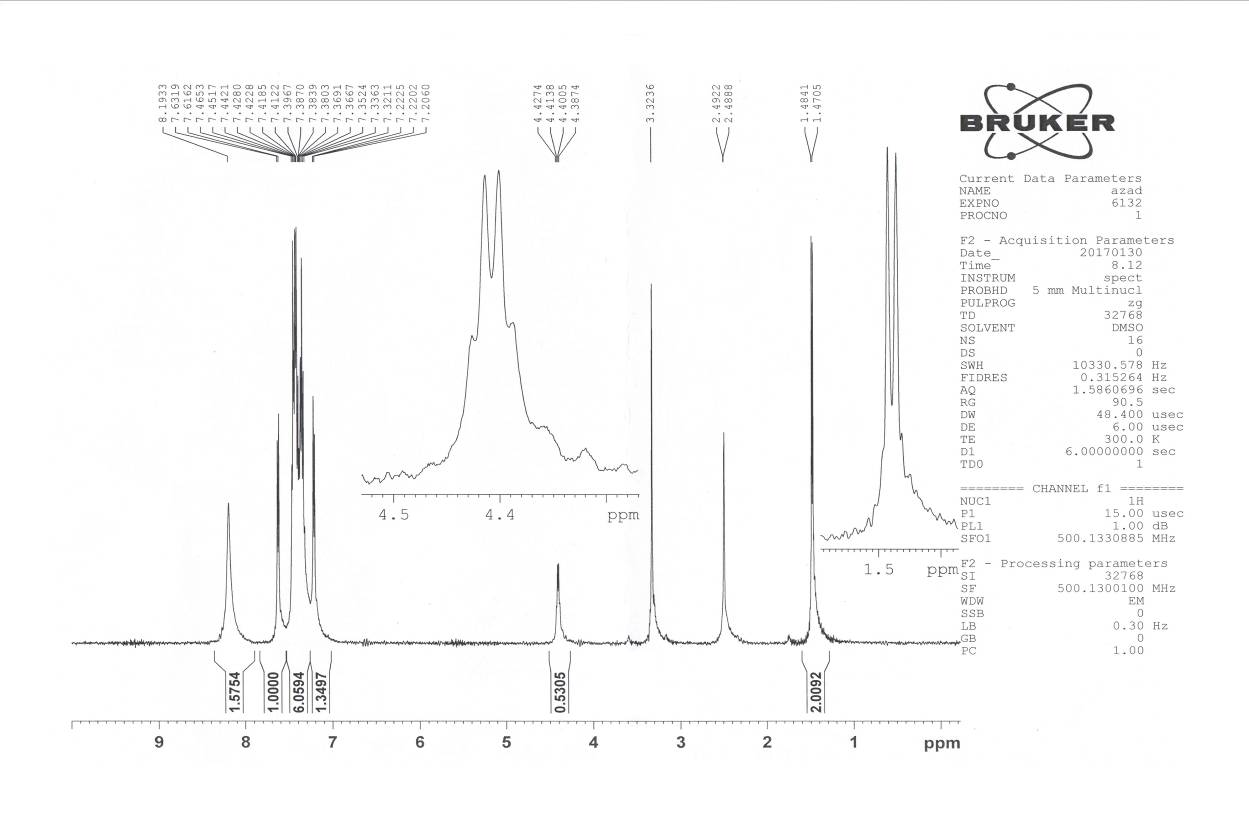


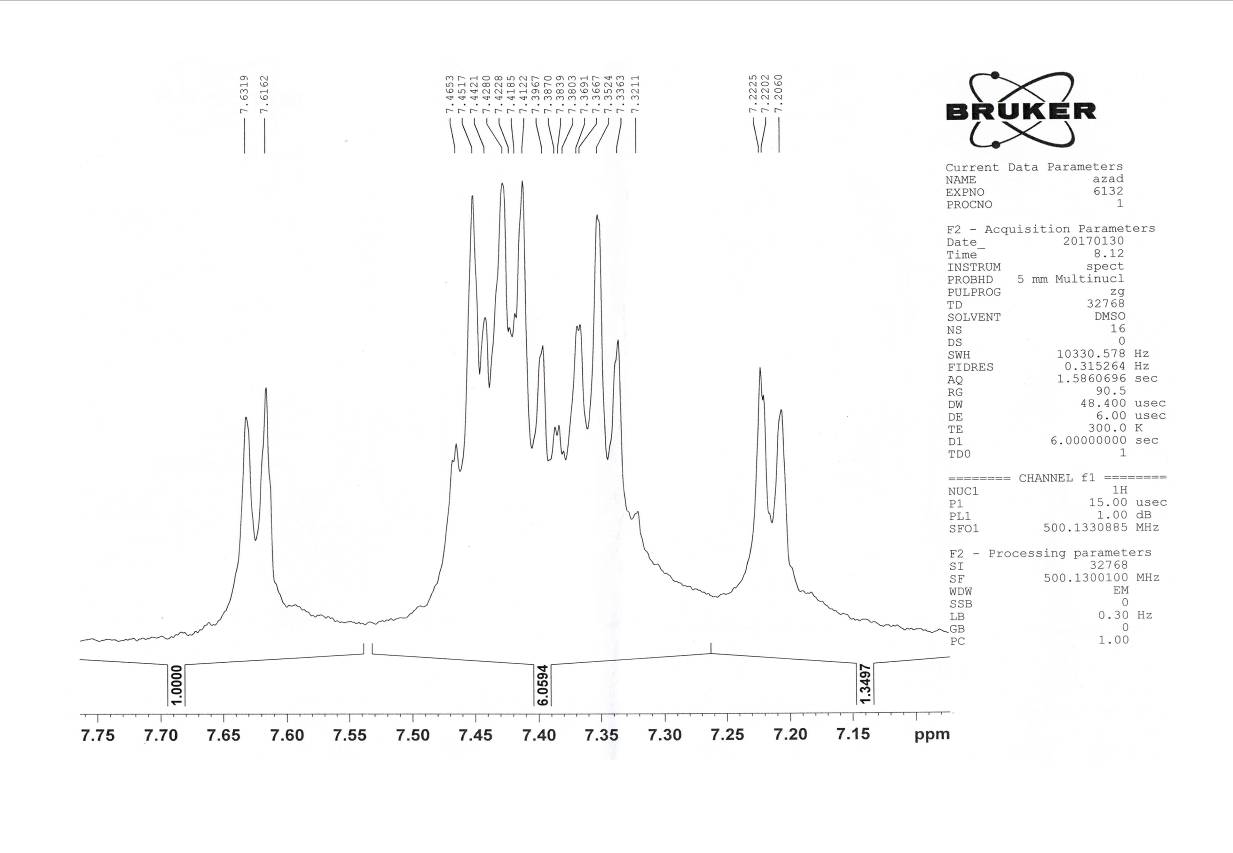


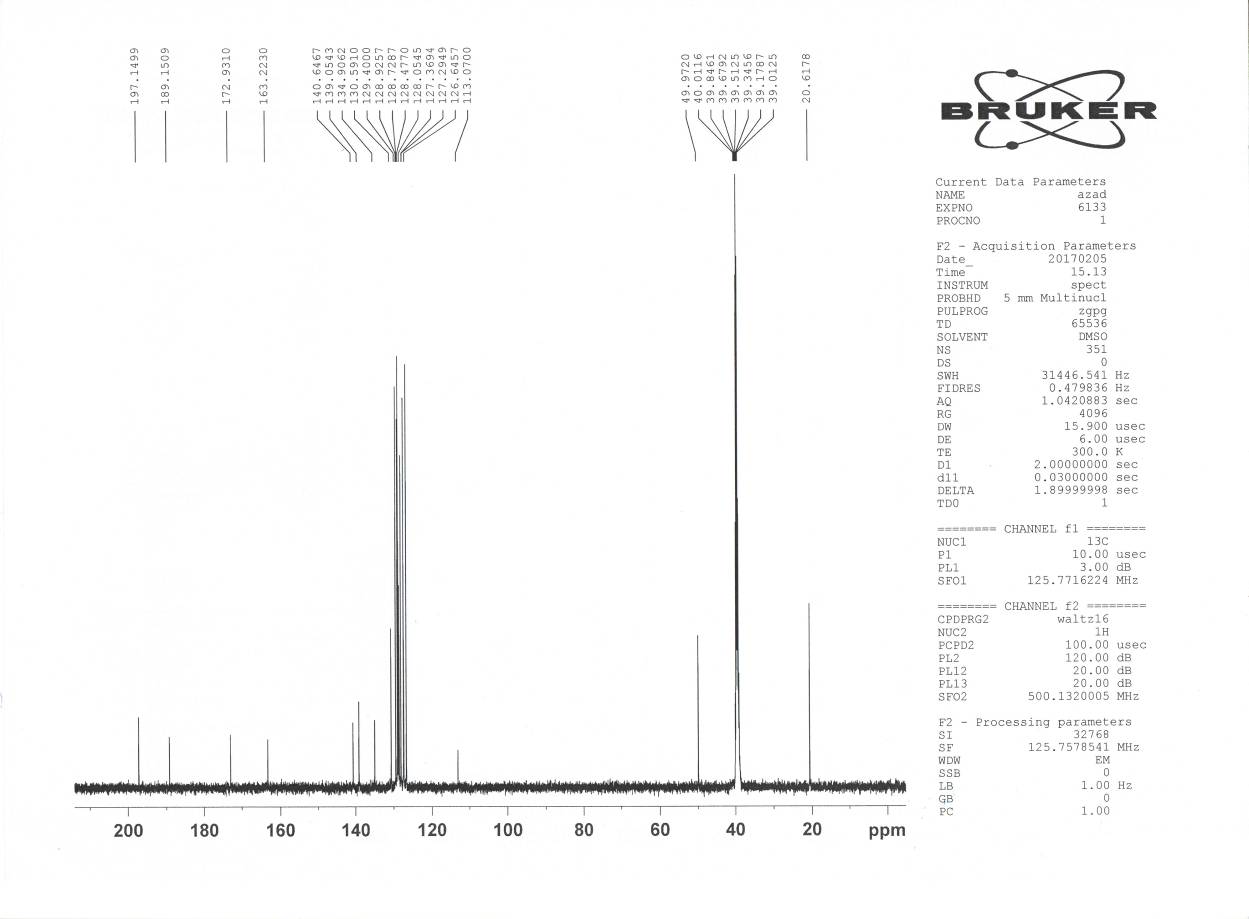


**
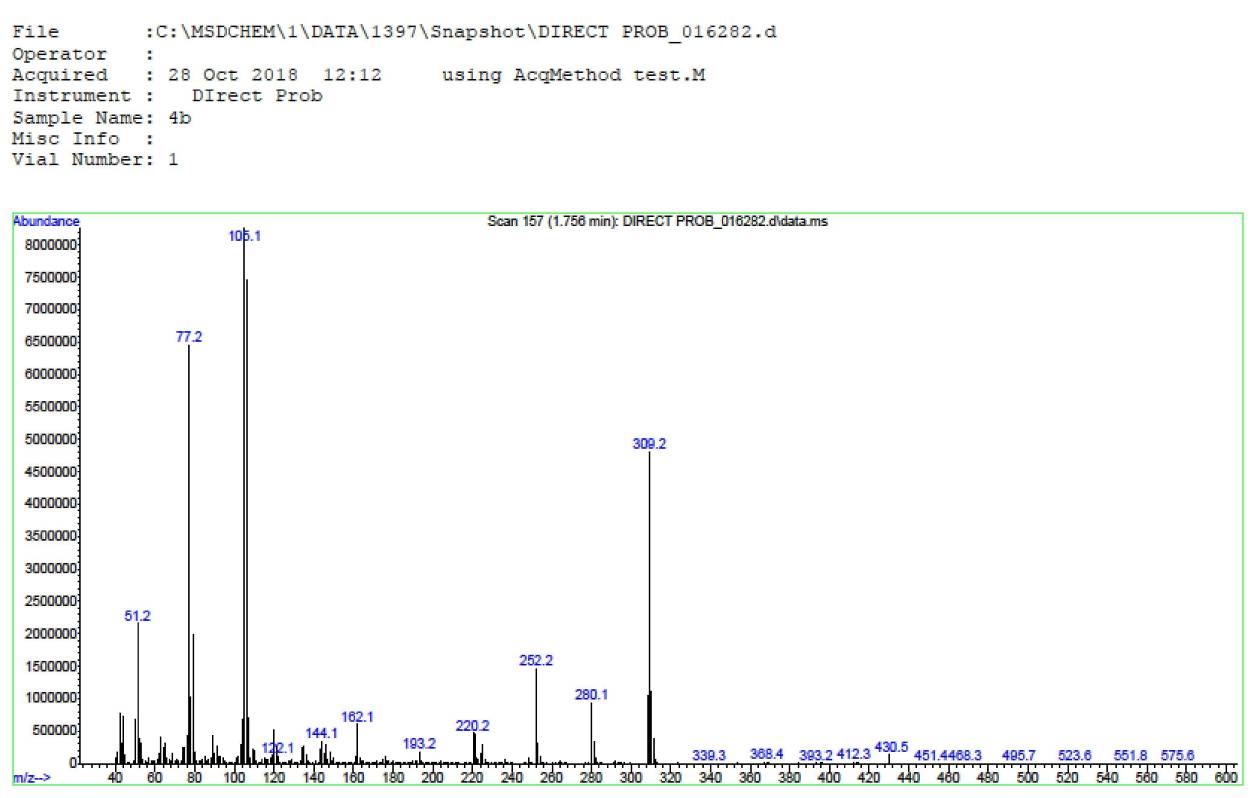
**

**(2*E*)-1,1-Dimethylbiguanido-5-yl-2-hydroxy-4-oxo-4-phenyl-3-(*N*-phenylthiocarbamoyl)-2-butenamide (4c)**


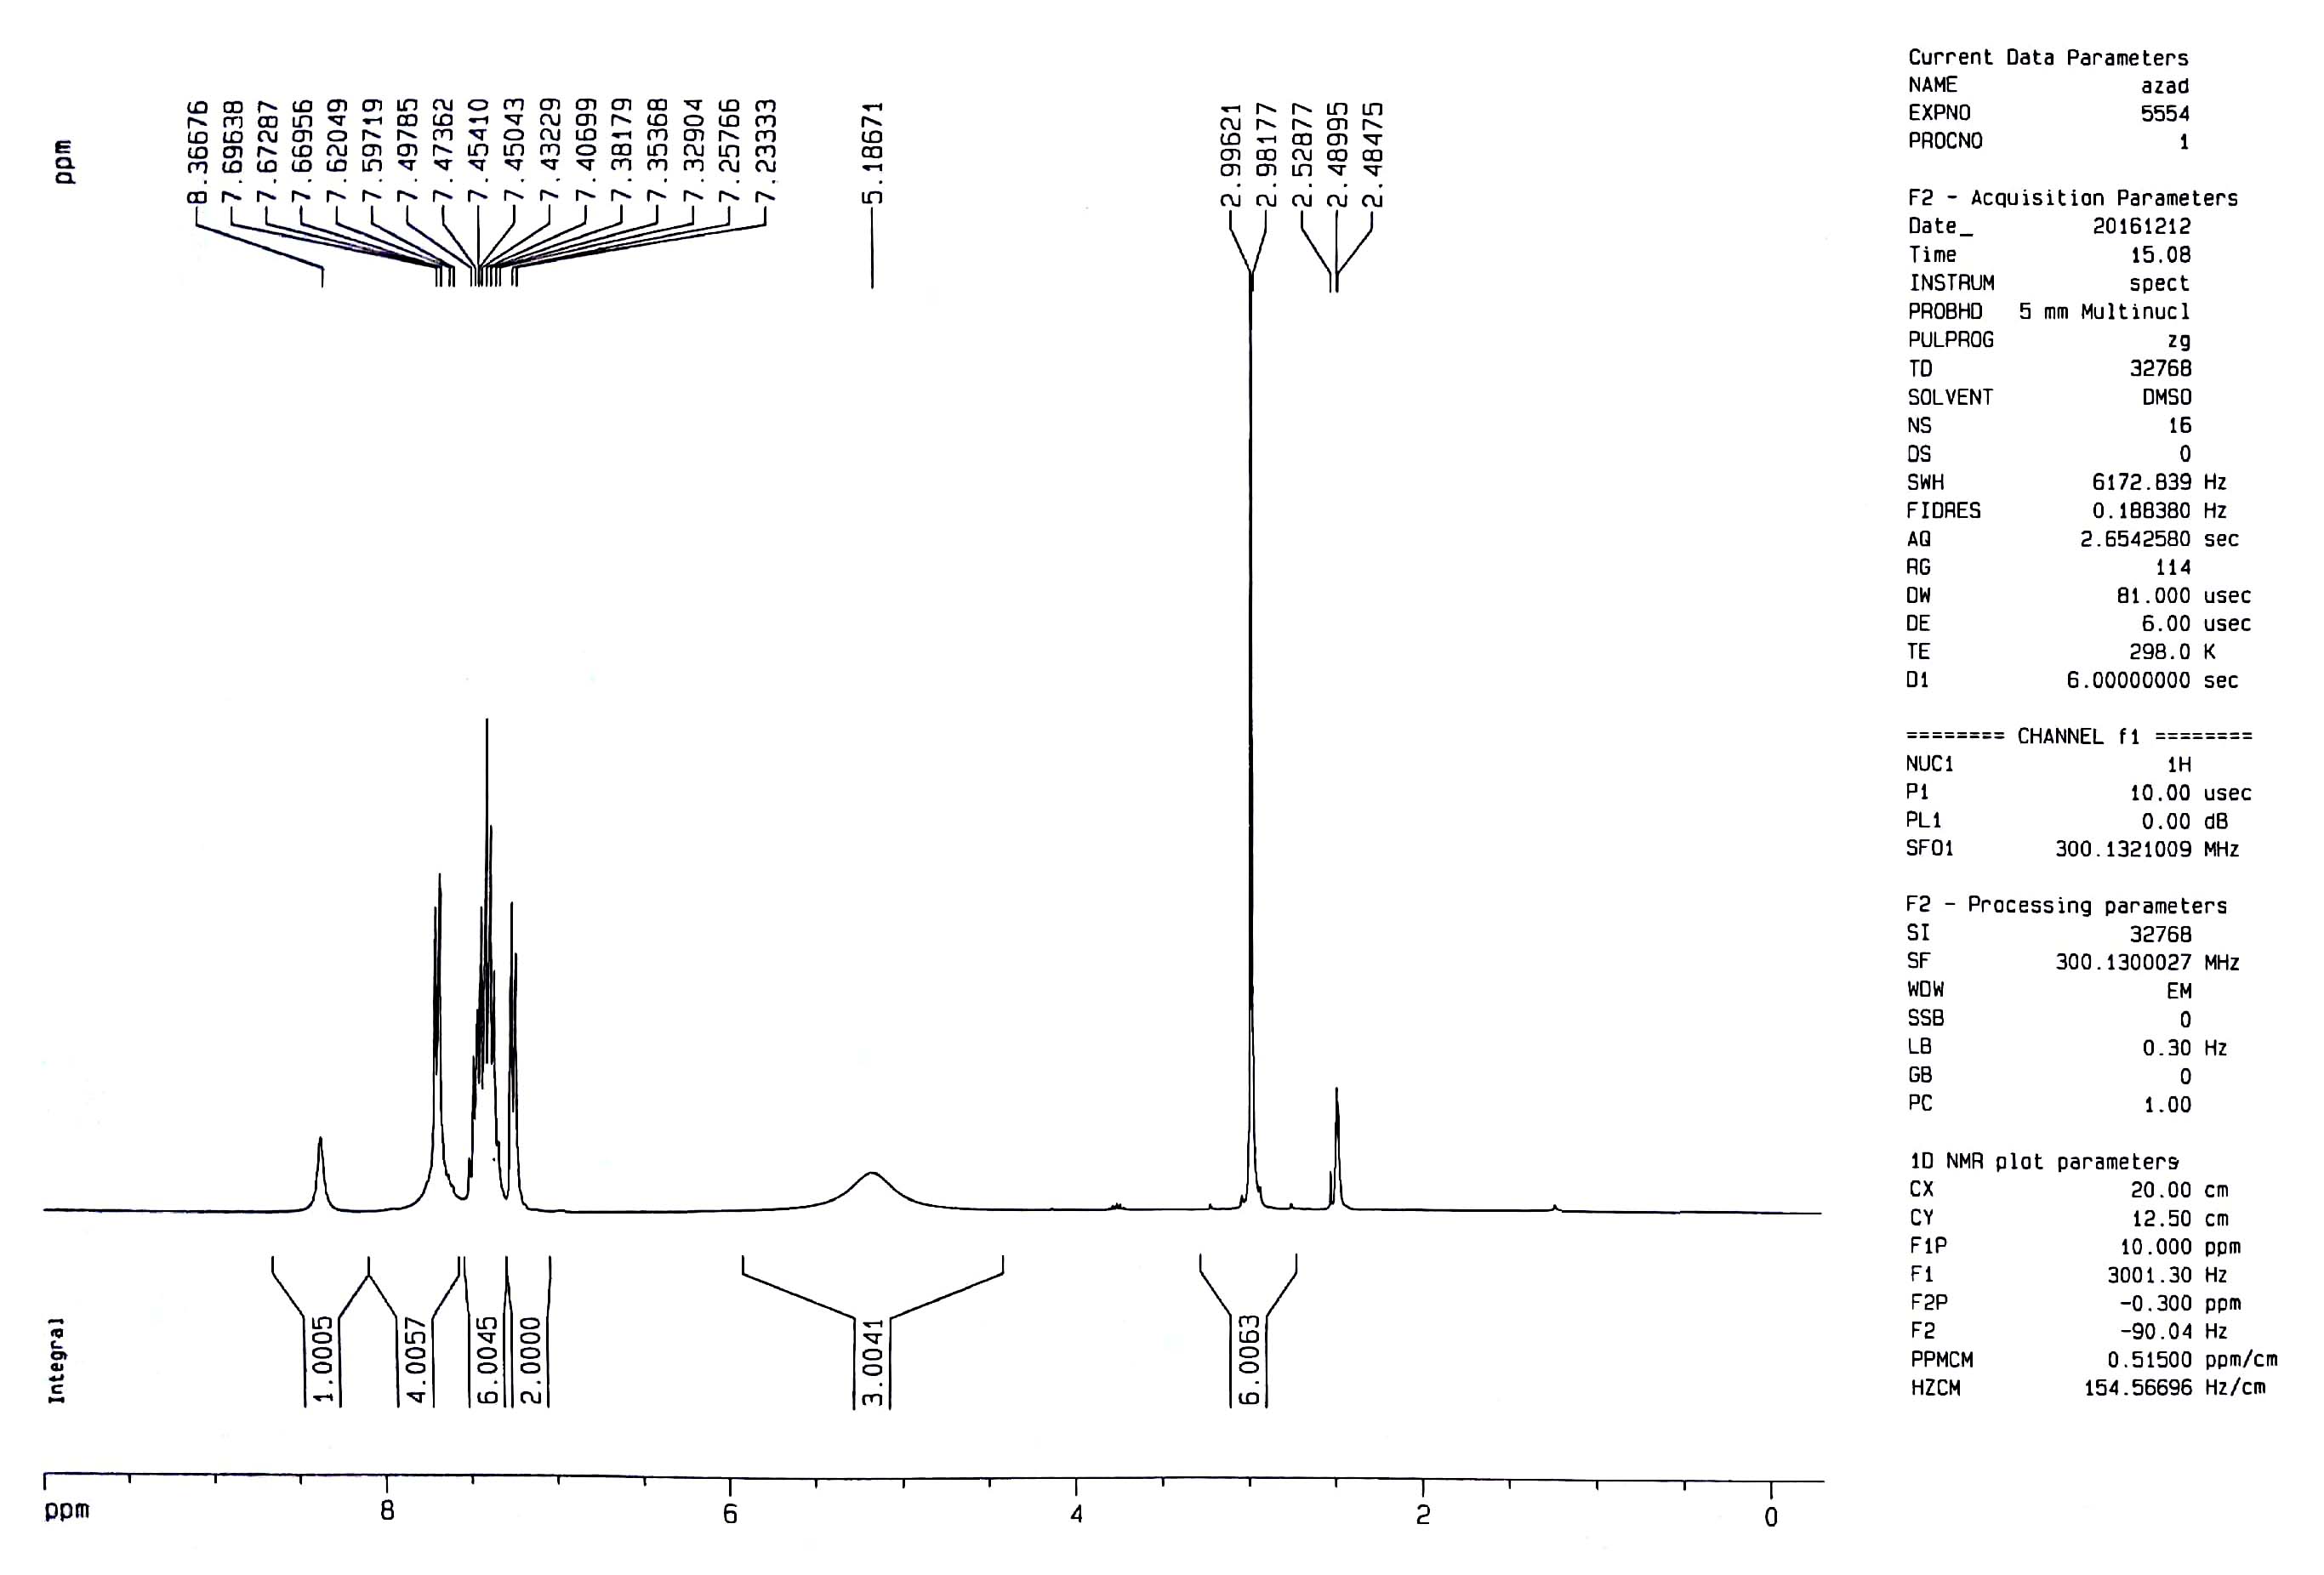


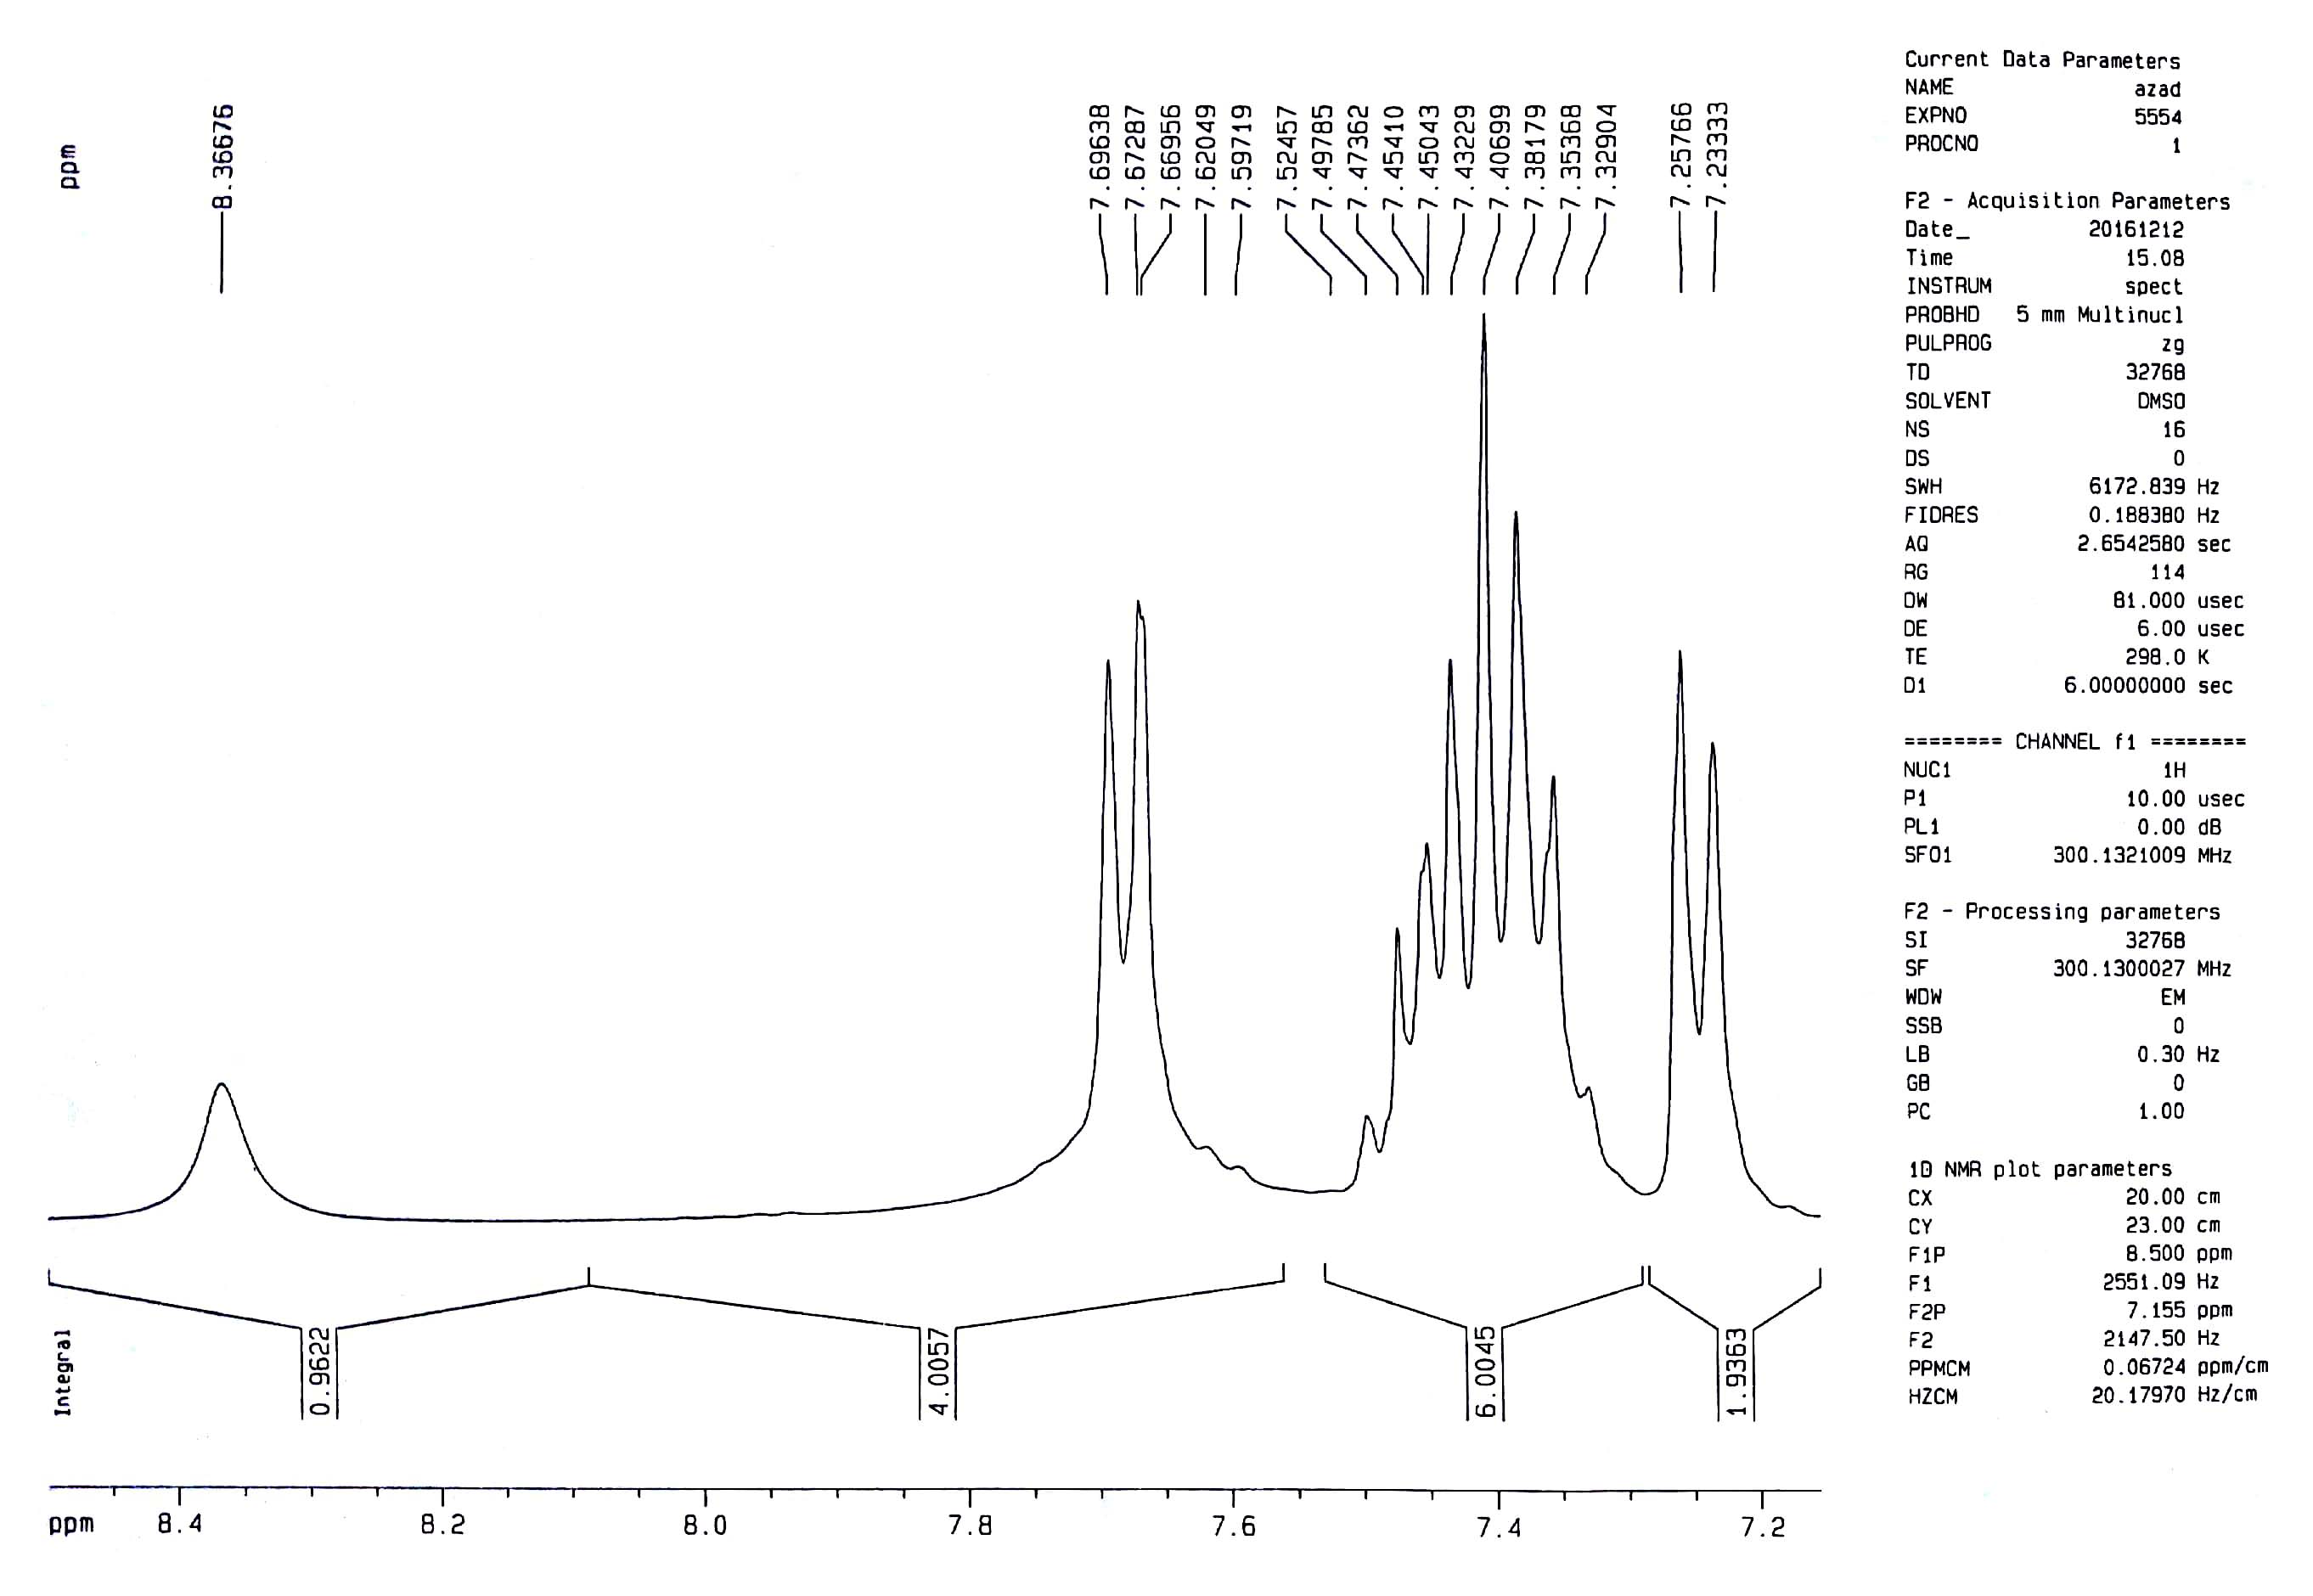


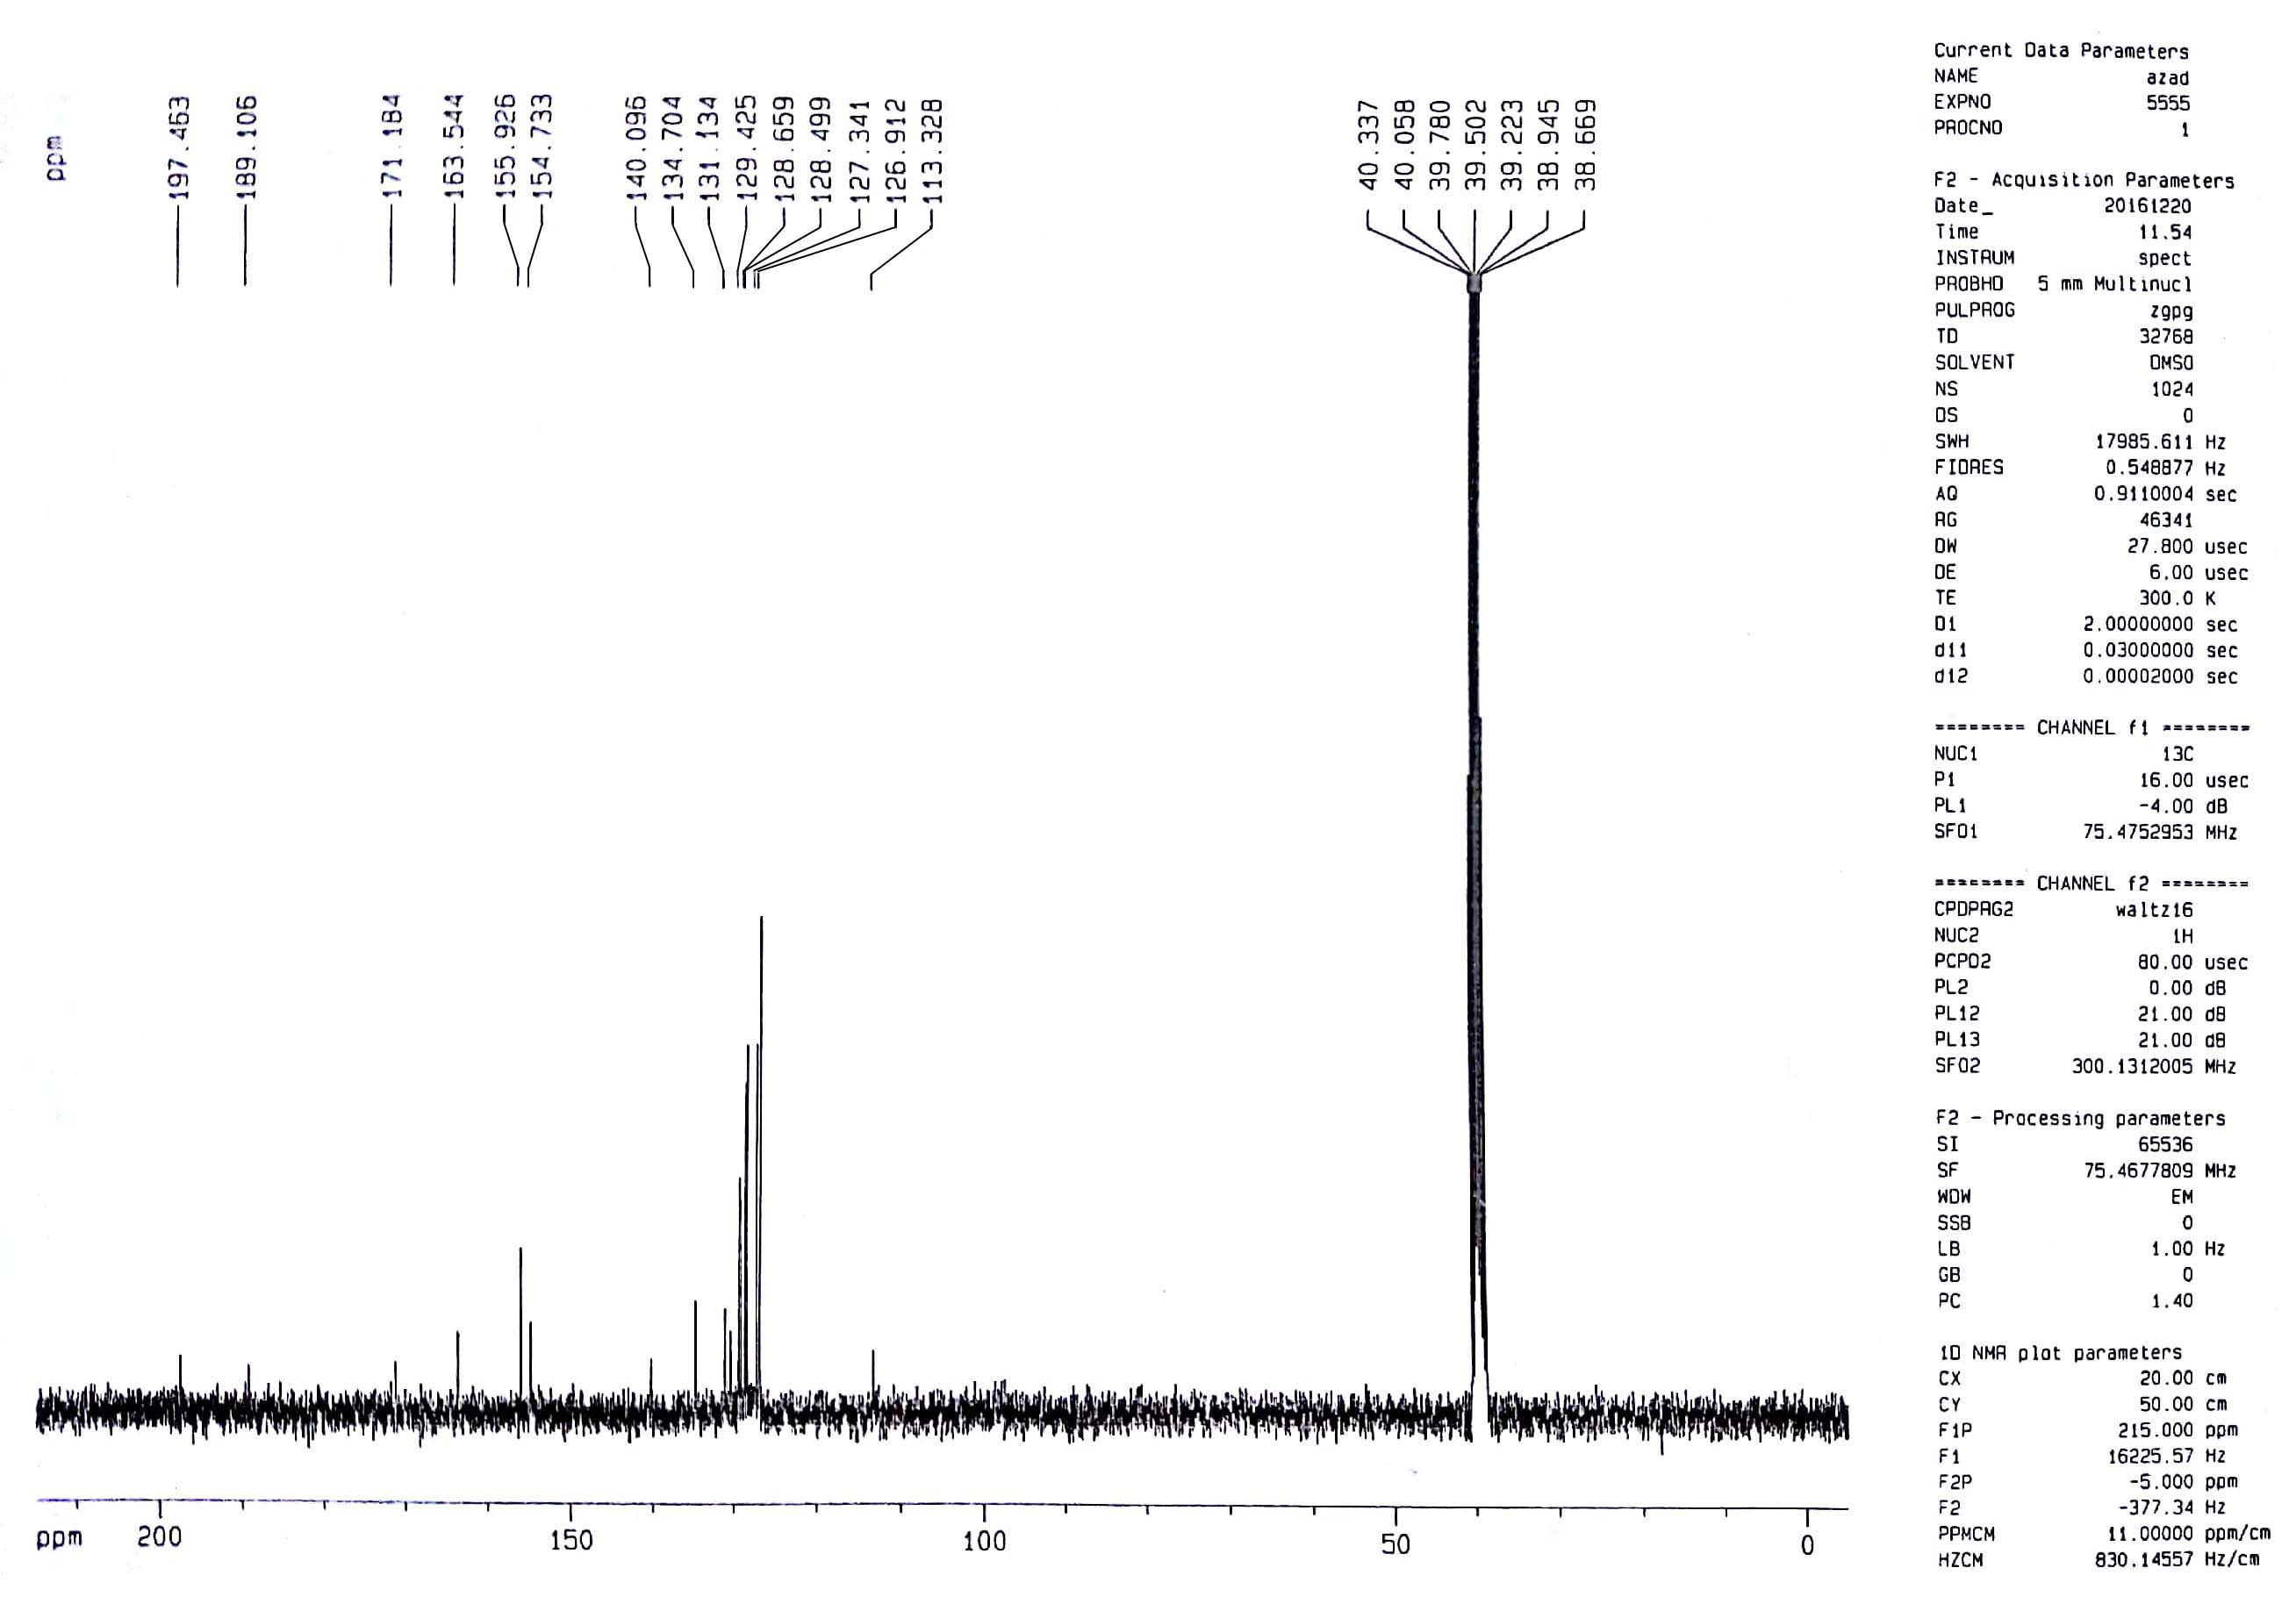


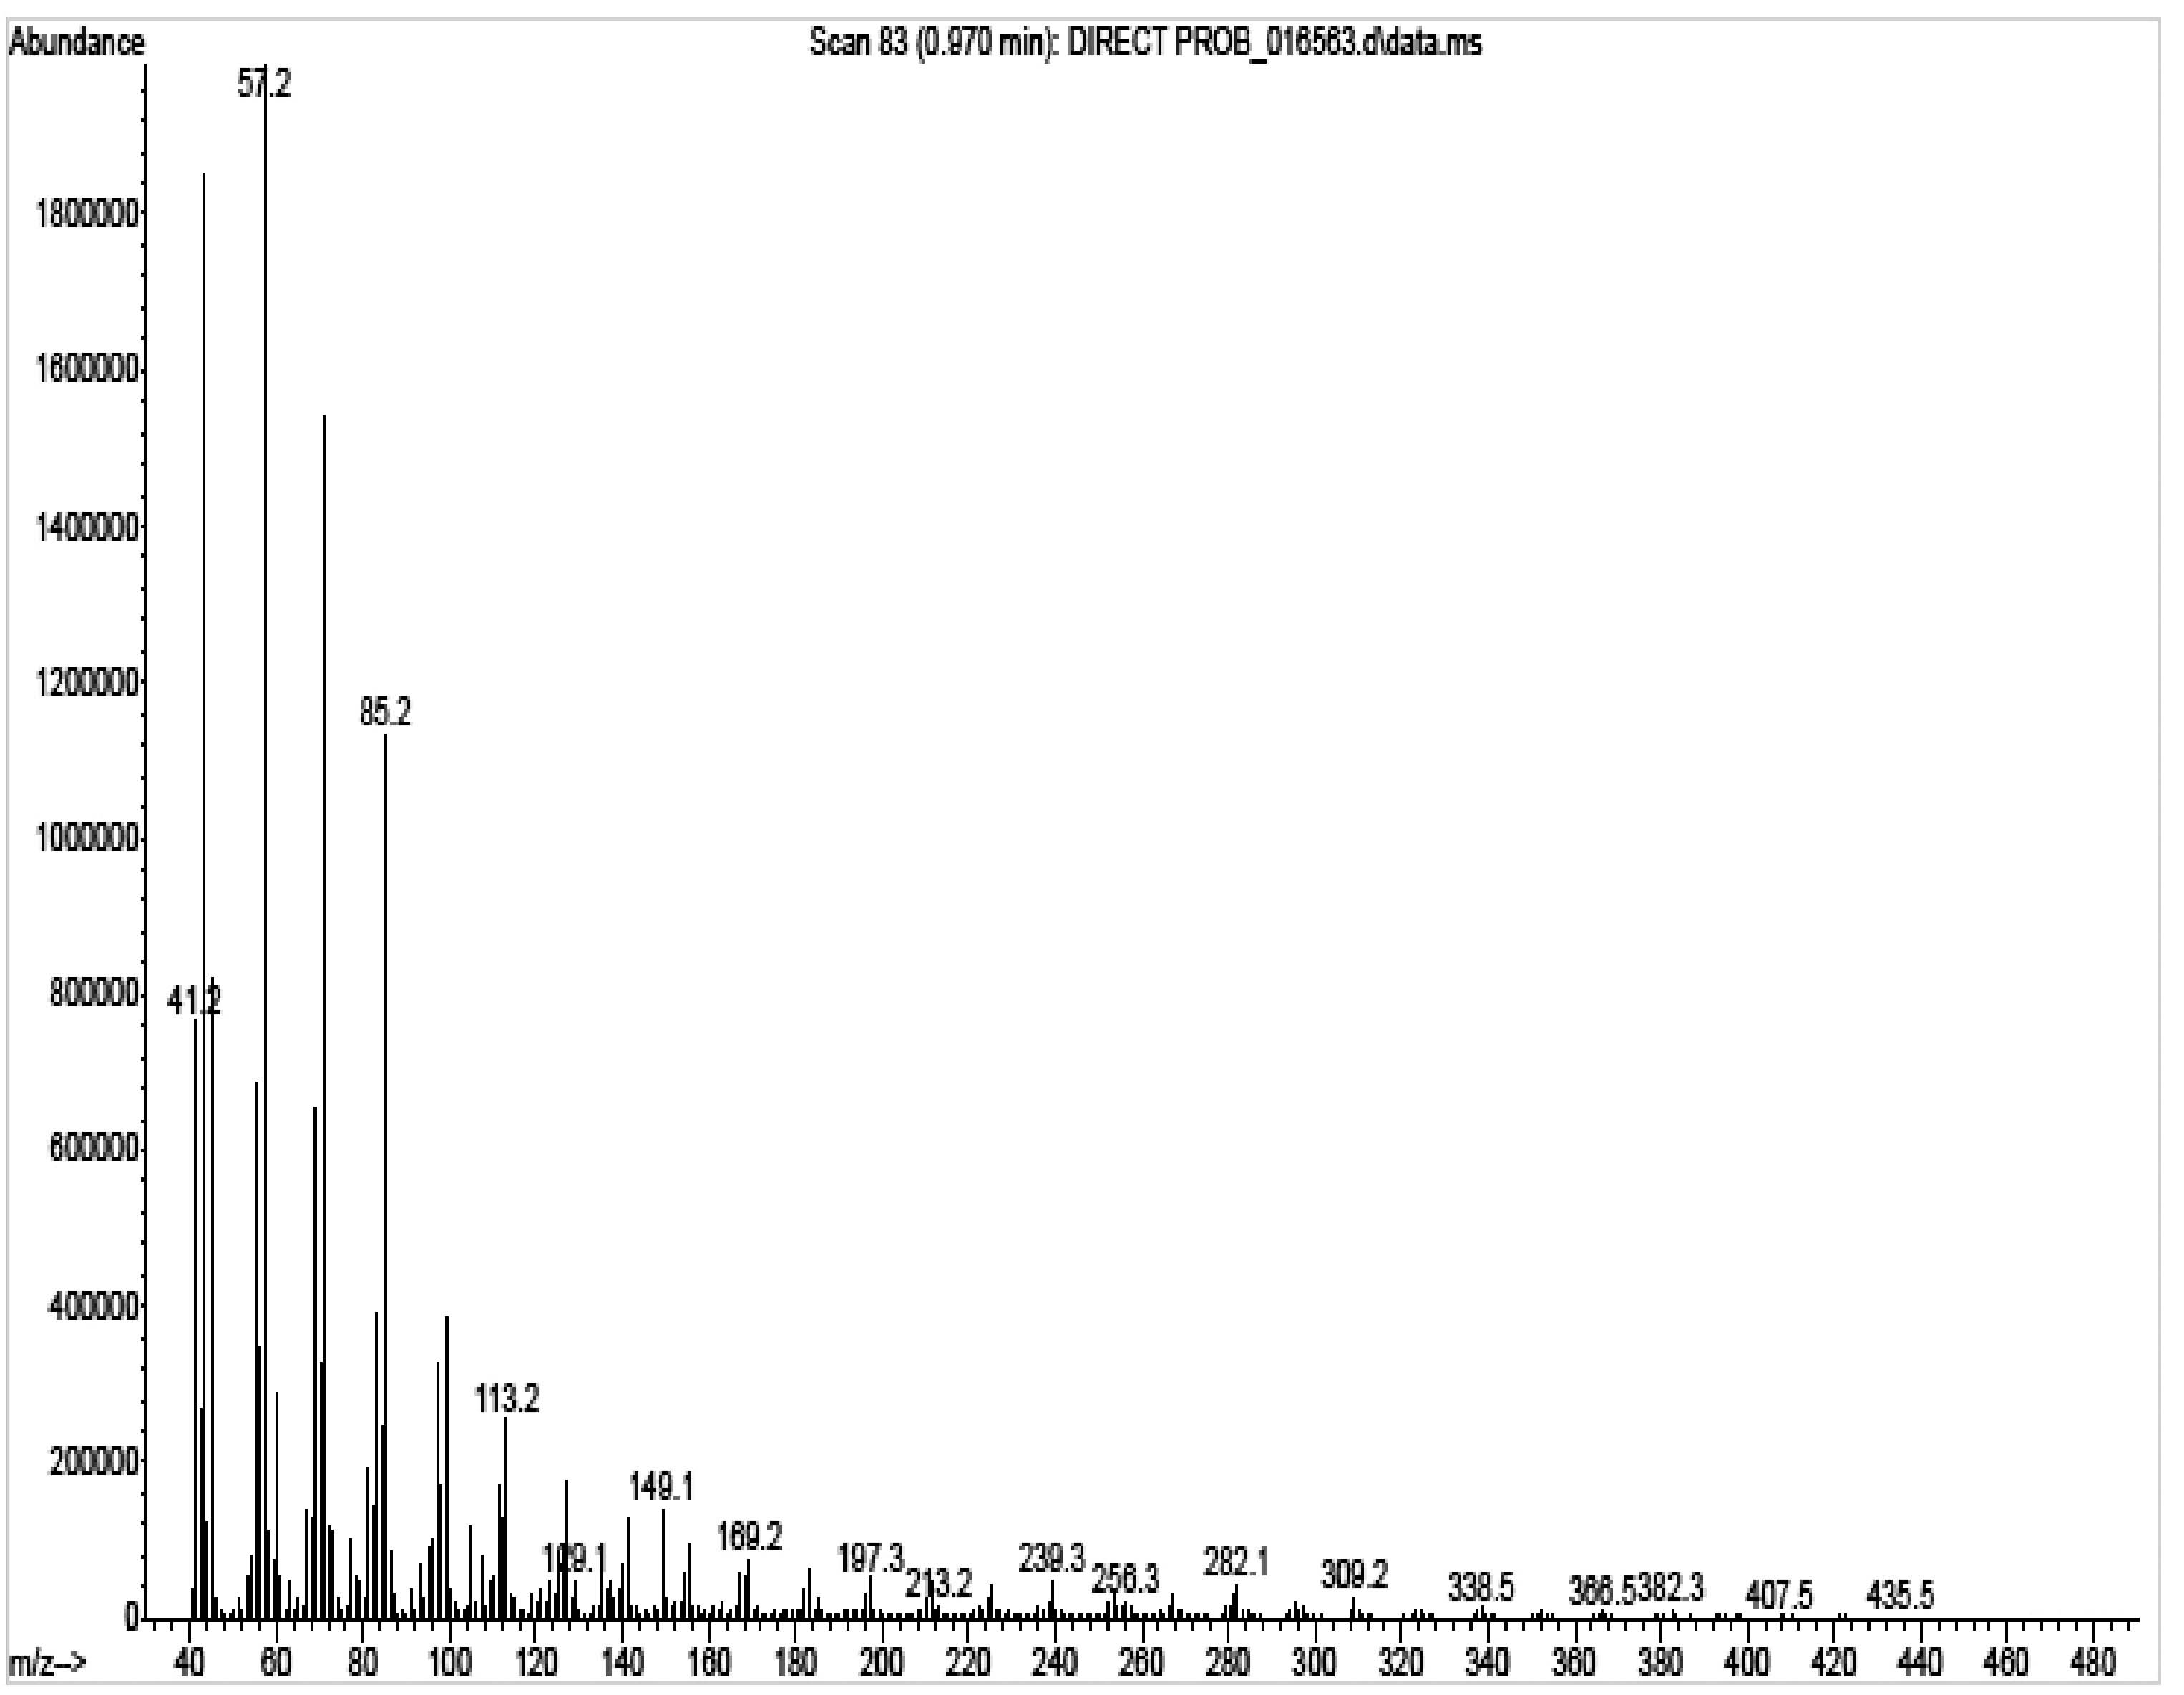


**4,4′-Bipyridinium bis((2*E*)-4-oxo-4-phenyl-3-(*N*-phenylthiocarbamoyl)-2-butenamide-2-oxide) (5)**


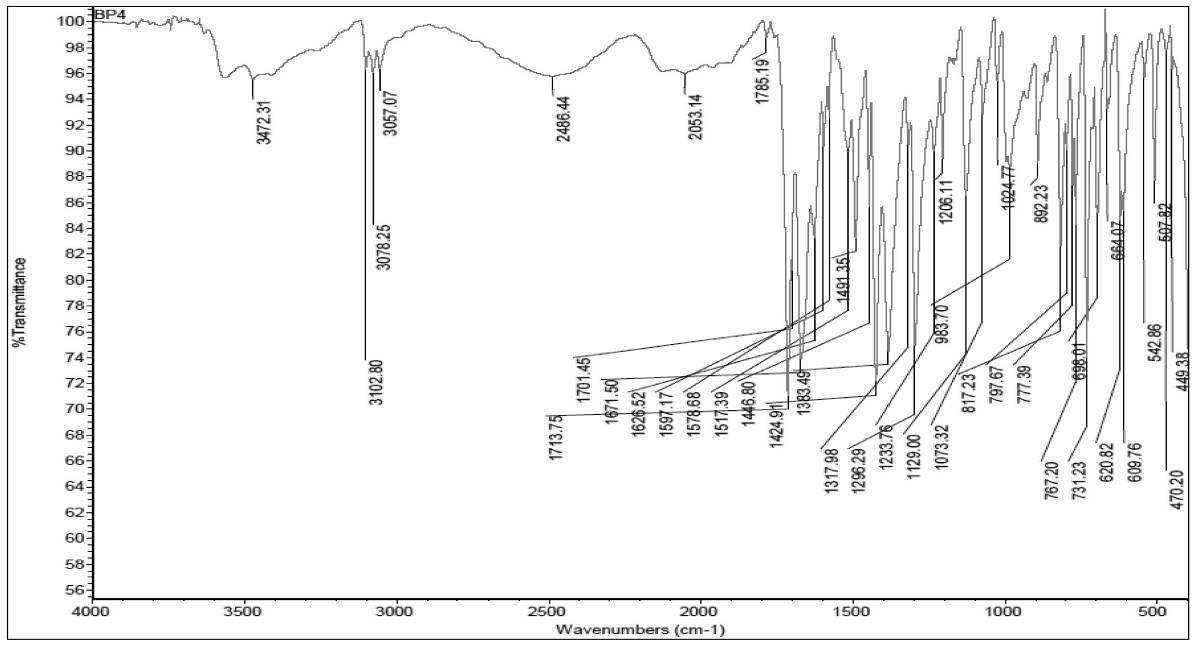


**
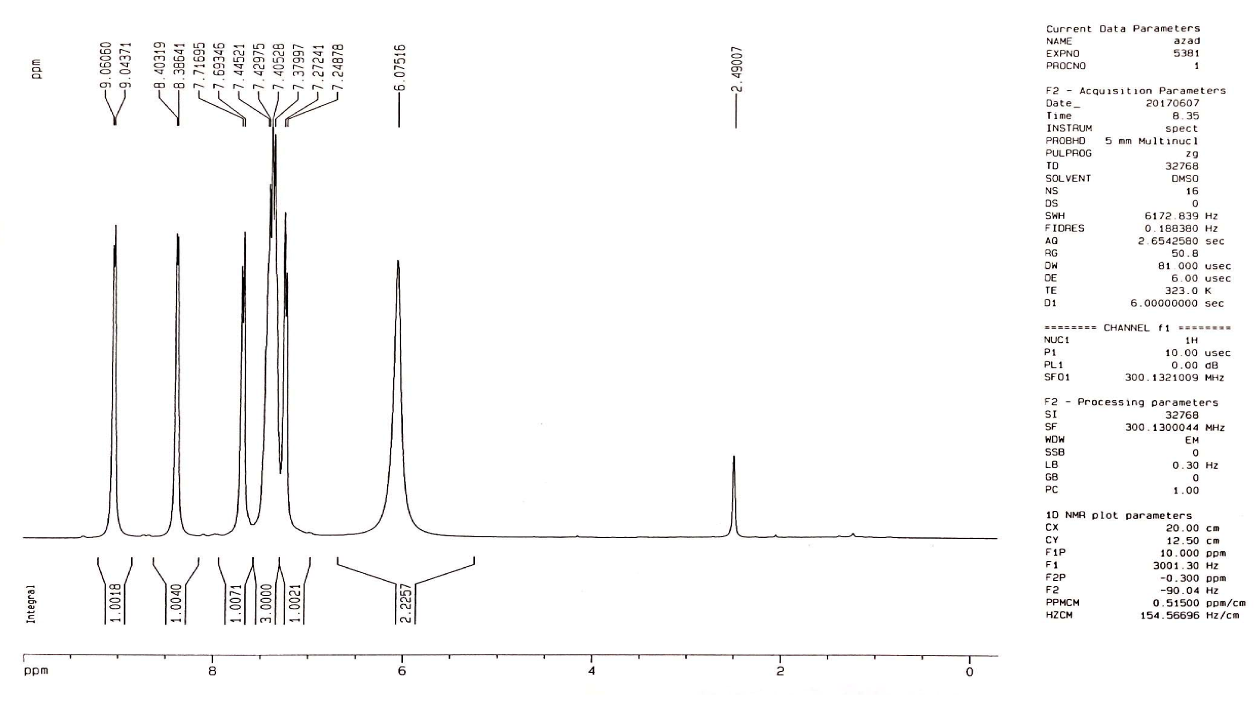
**

**
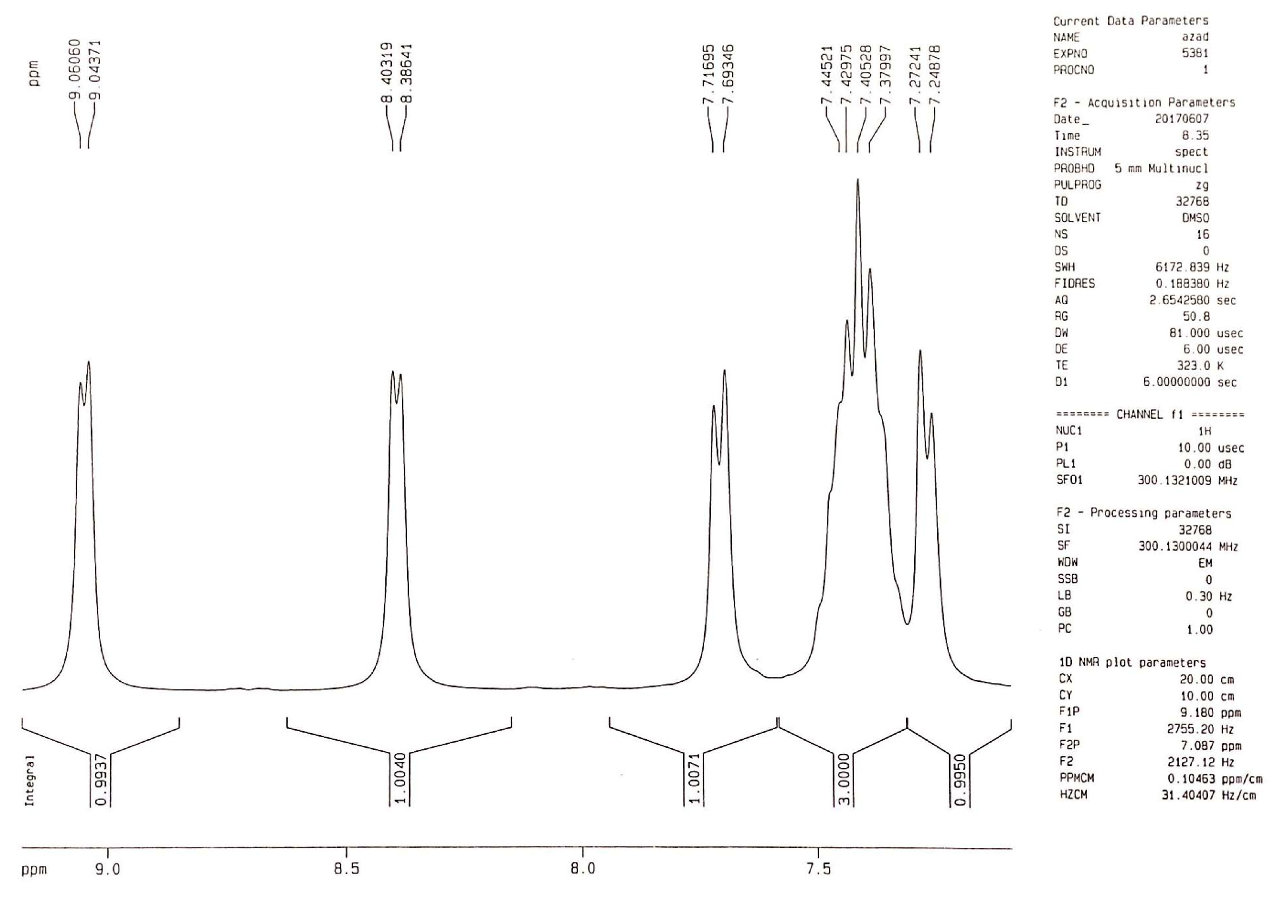

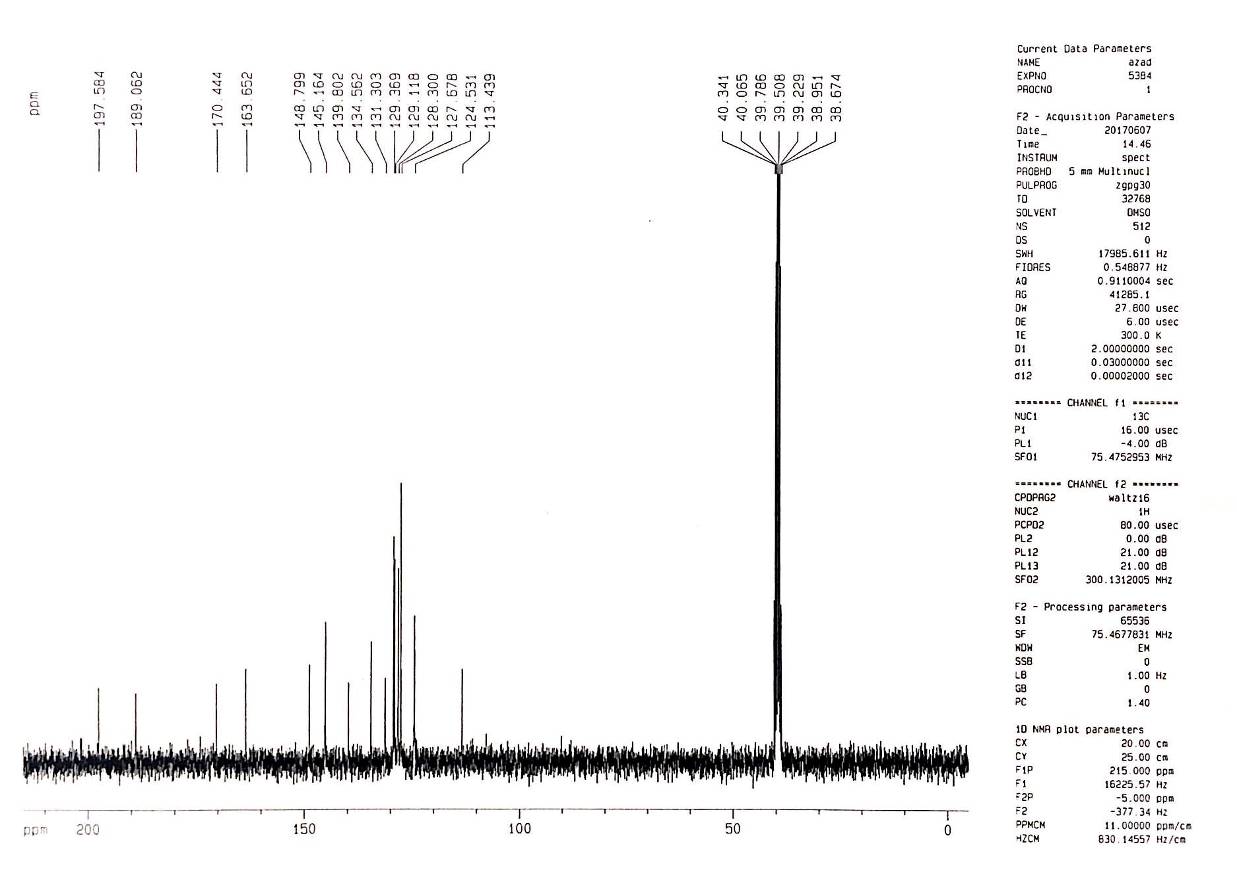
**

**
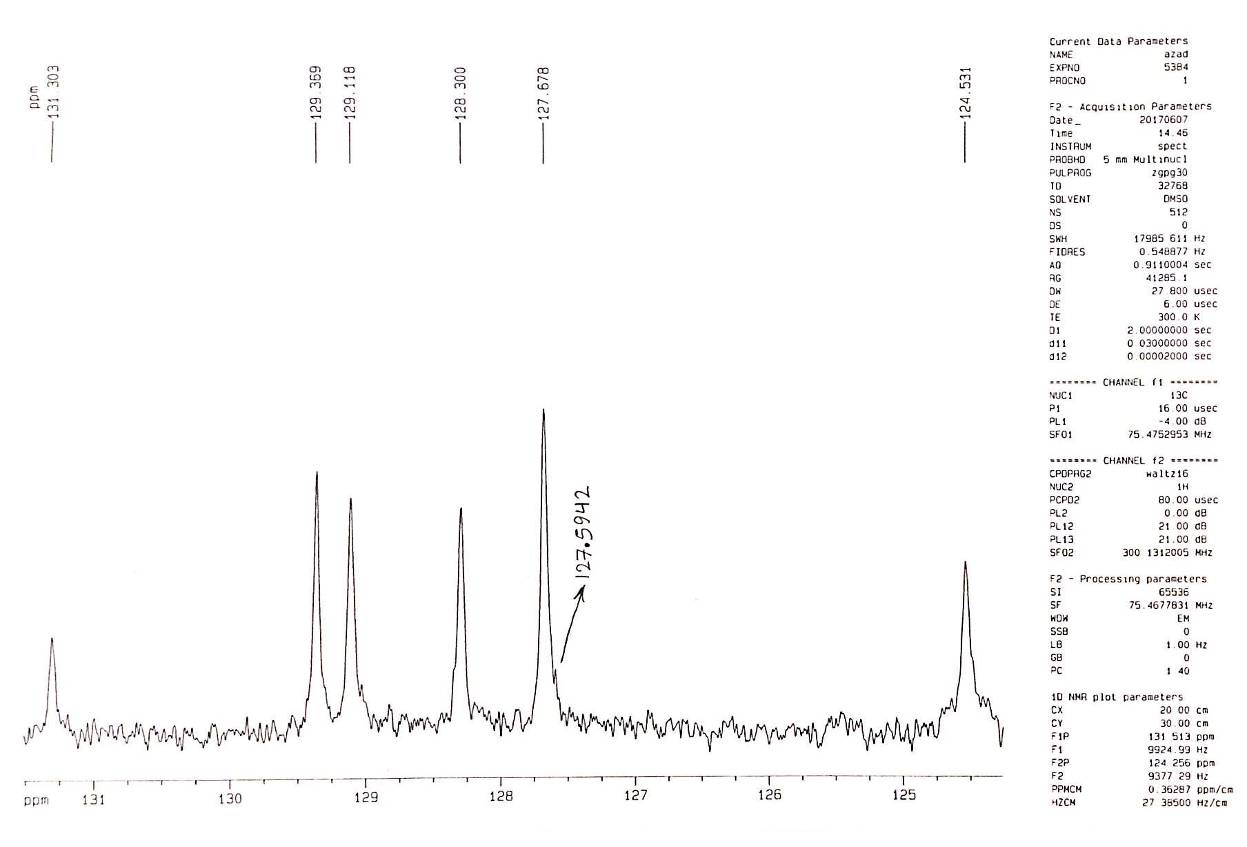
**

**
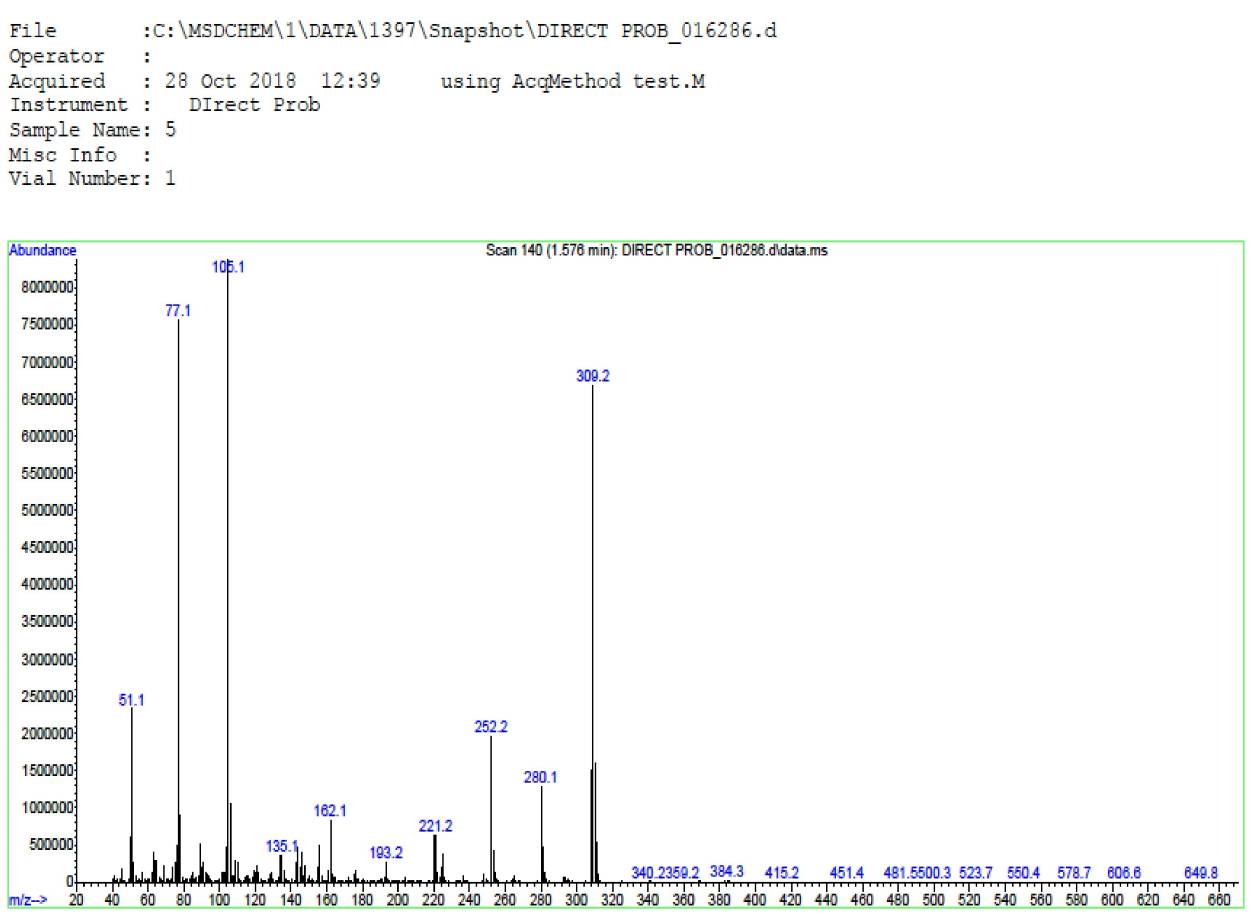
**

**4-Benzoyl-3-(1-naphthylamino)-5-phenylimino-2,5-dihydrothiophene-2-one (6)**


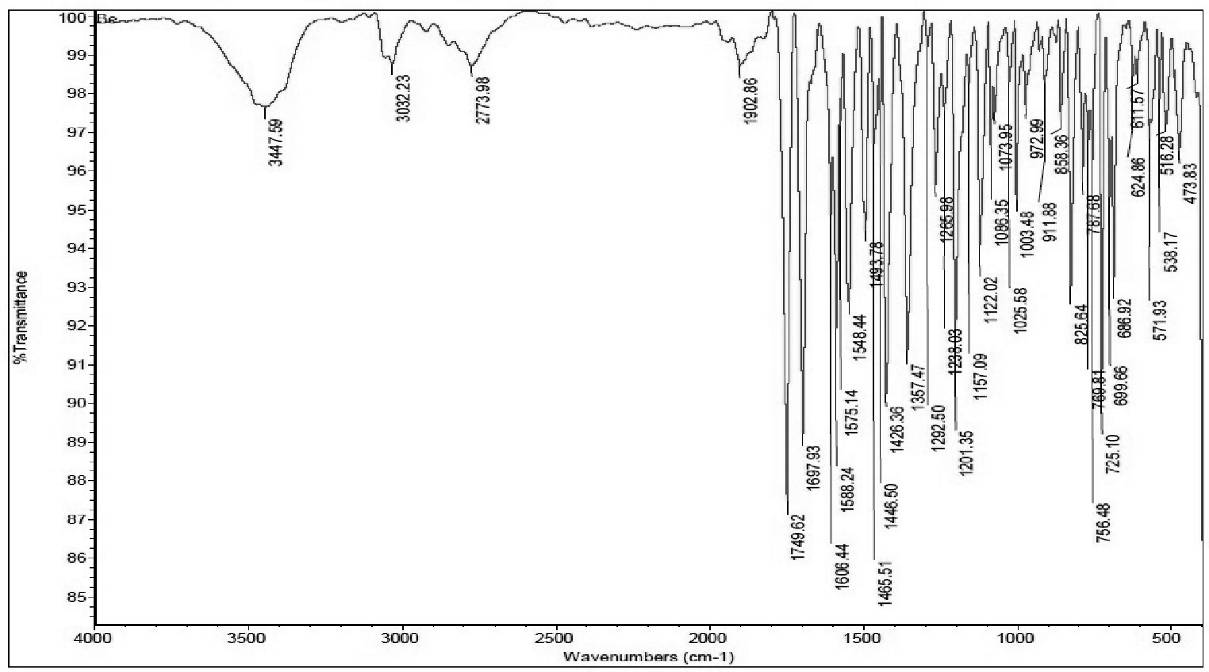


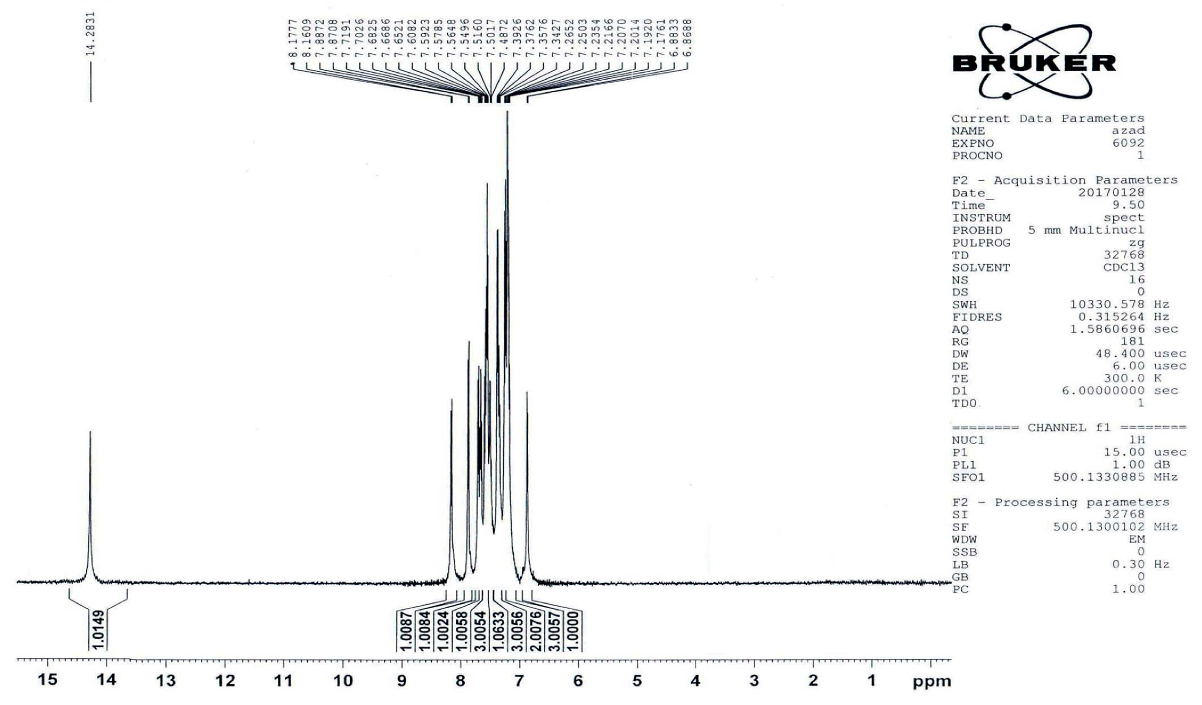


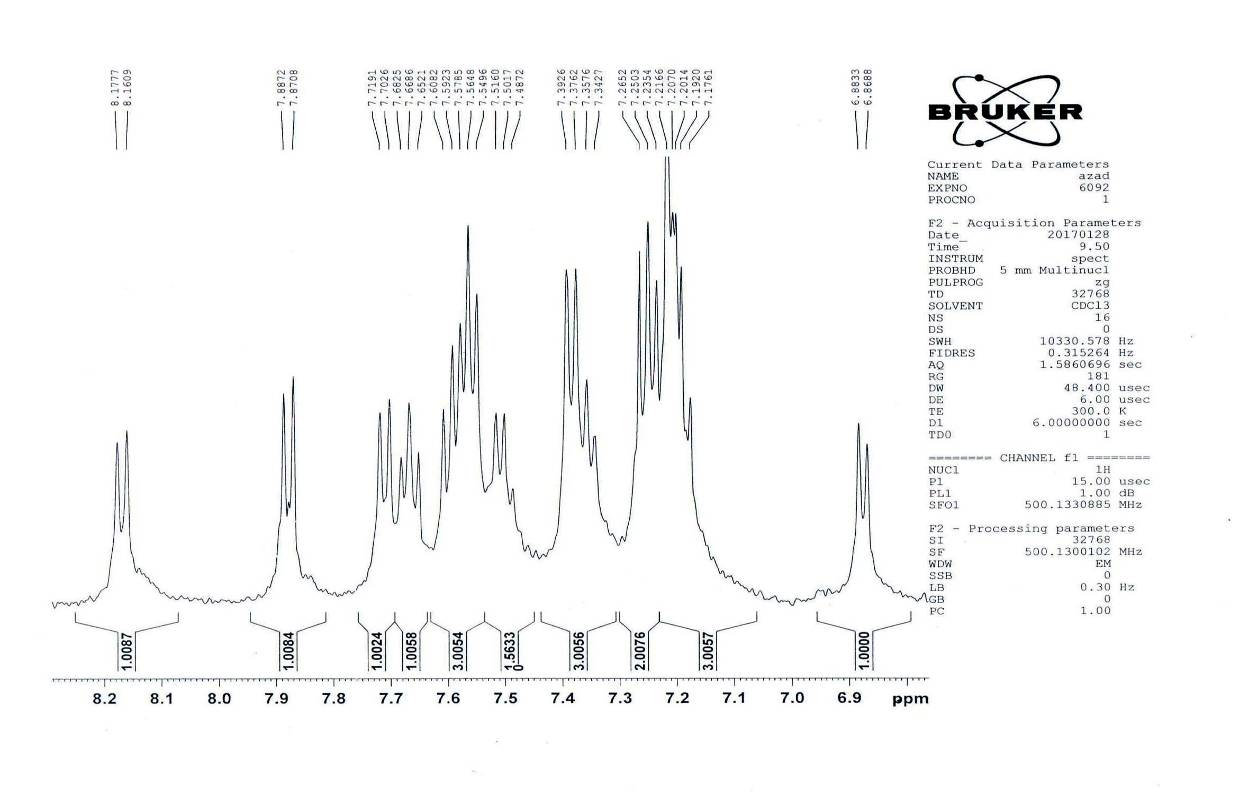


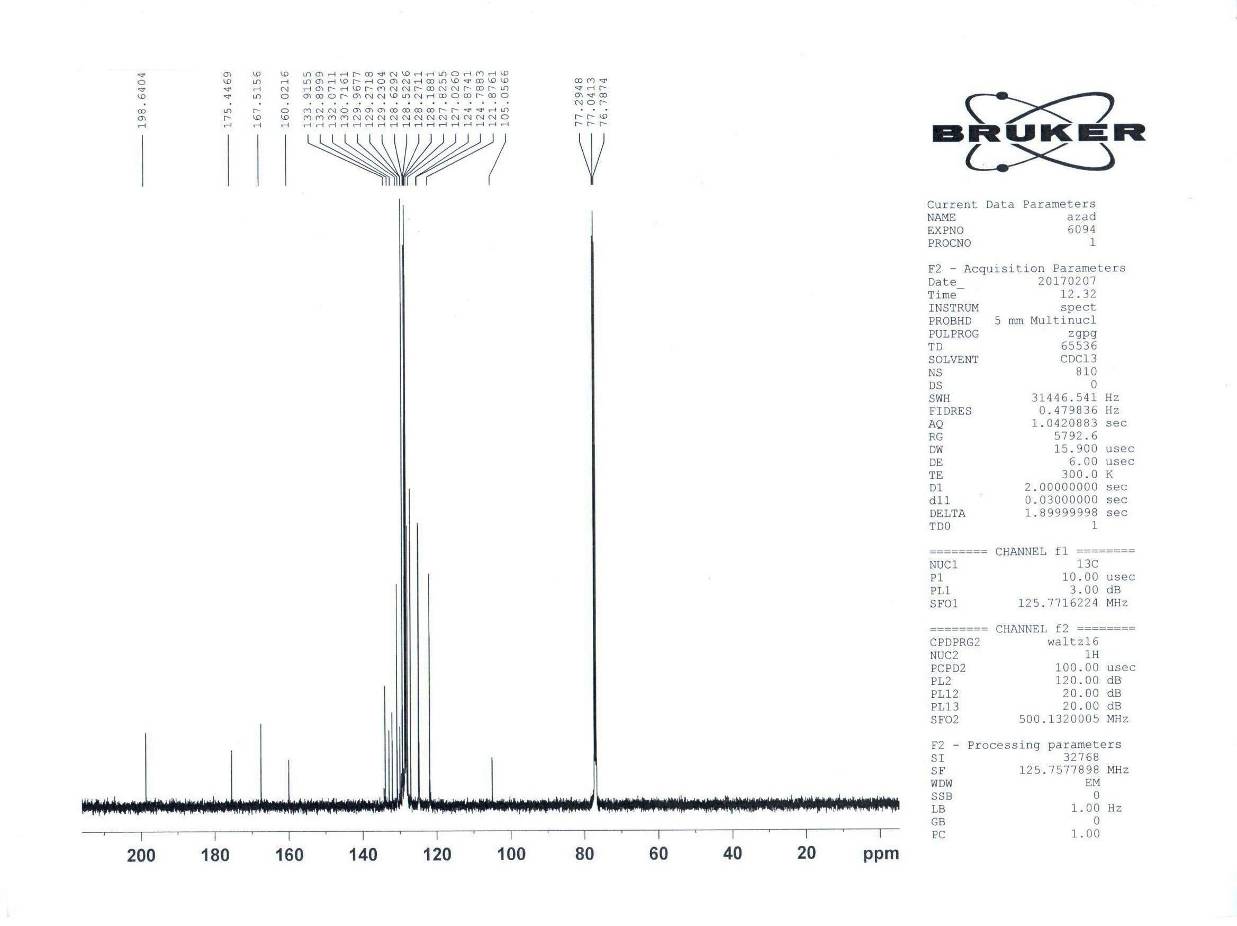


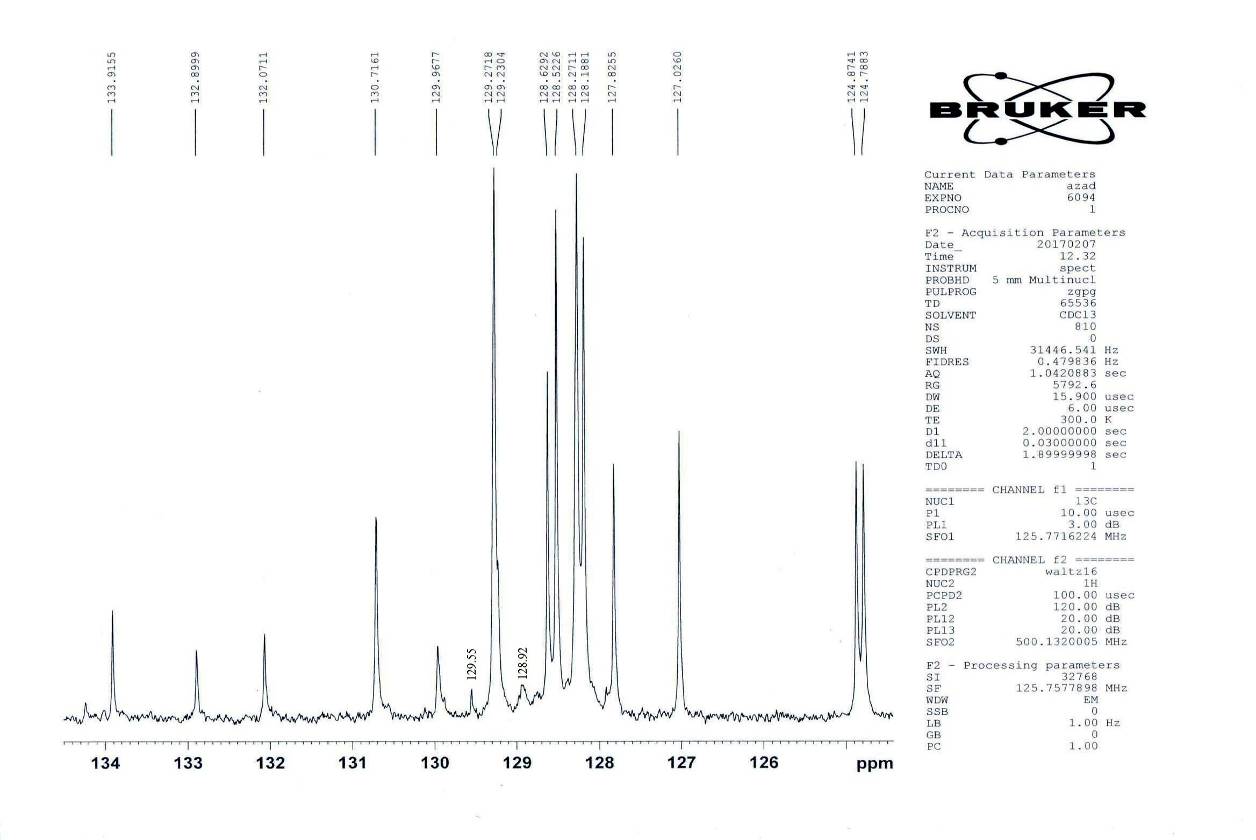

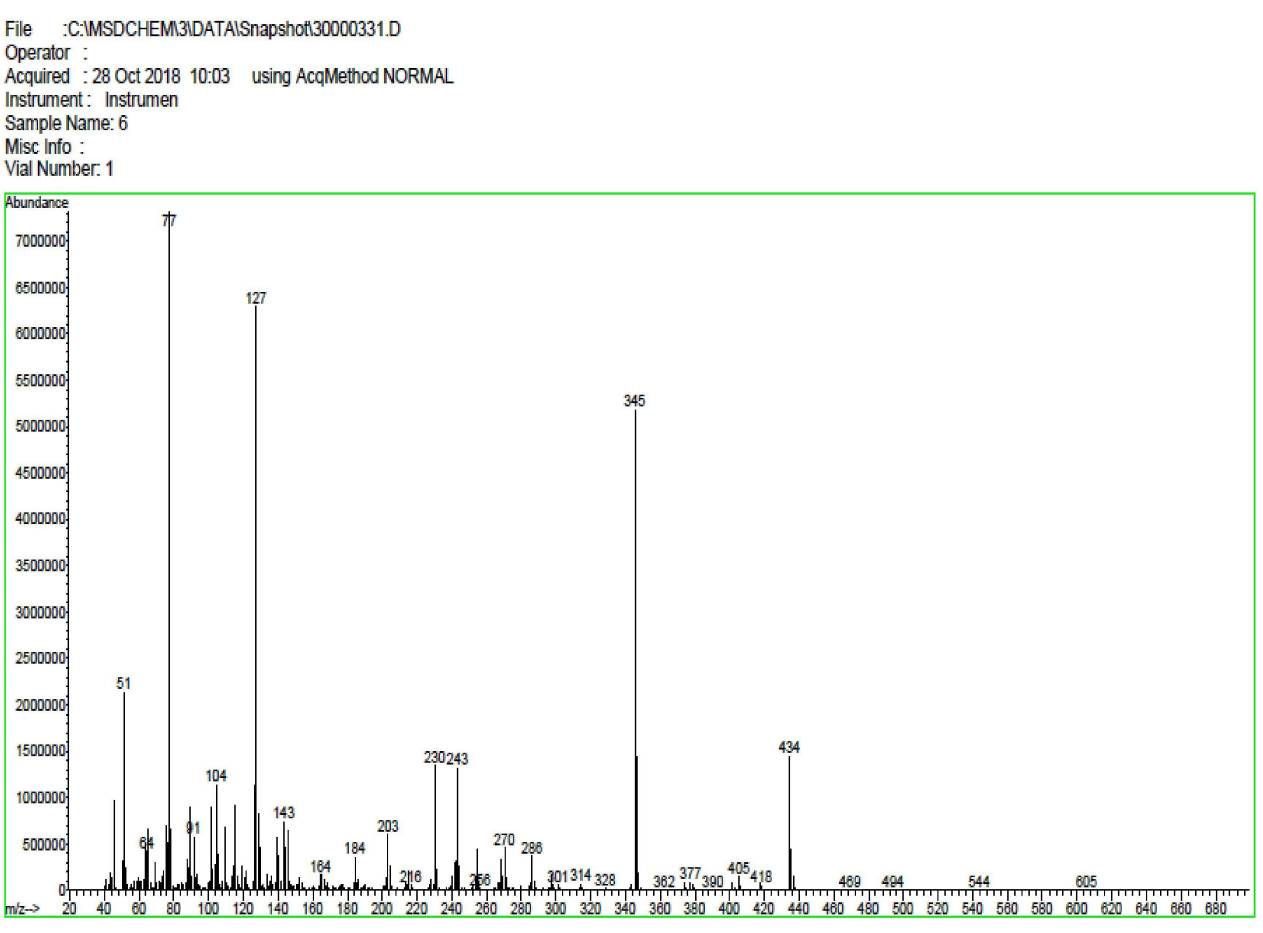


**1,5-Bis(4-benzoyl-2-oxo-5-phenylimino-2,5-dihydrothiophene-3-ylamino)naphthalene (7)**


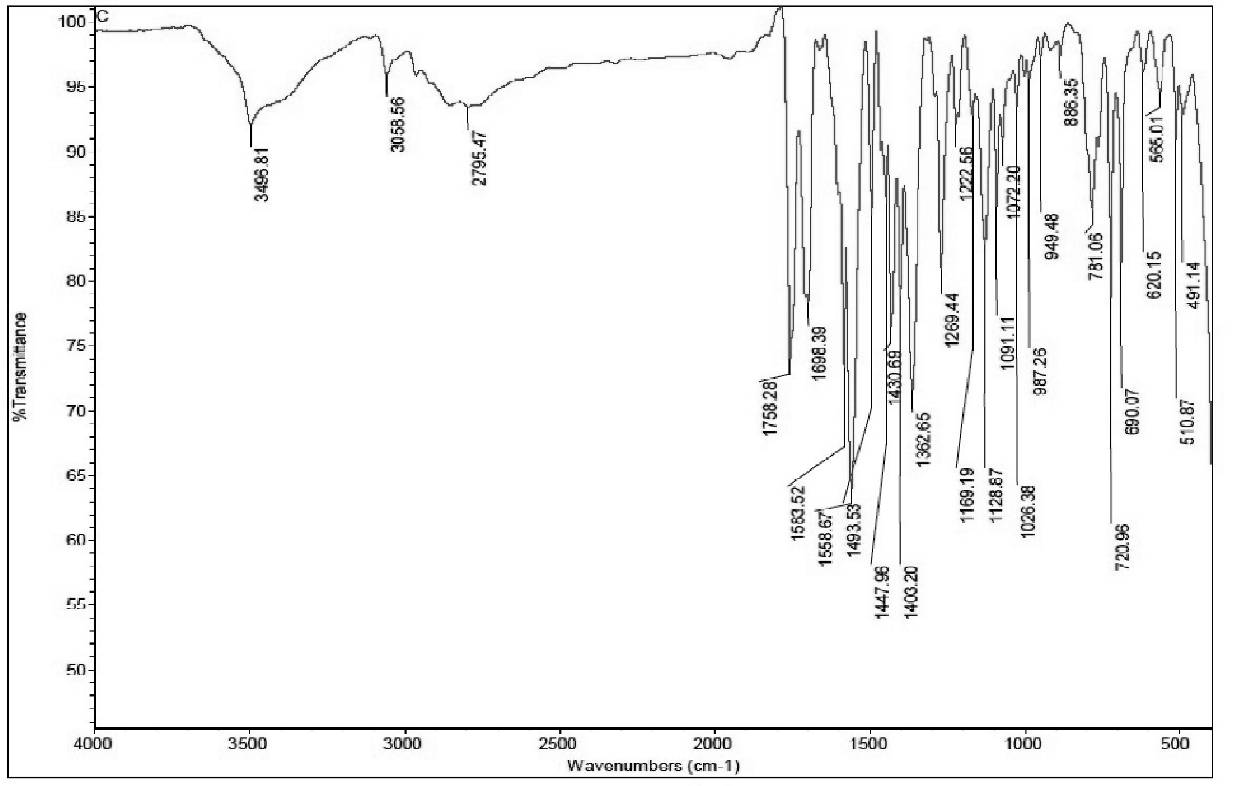


**
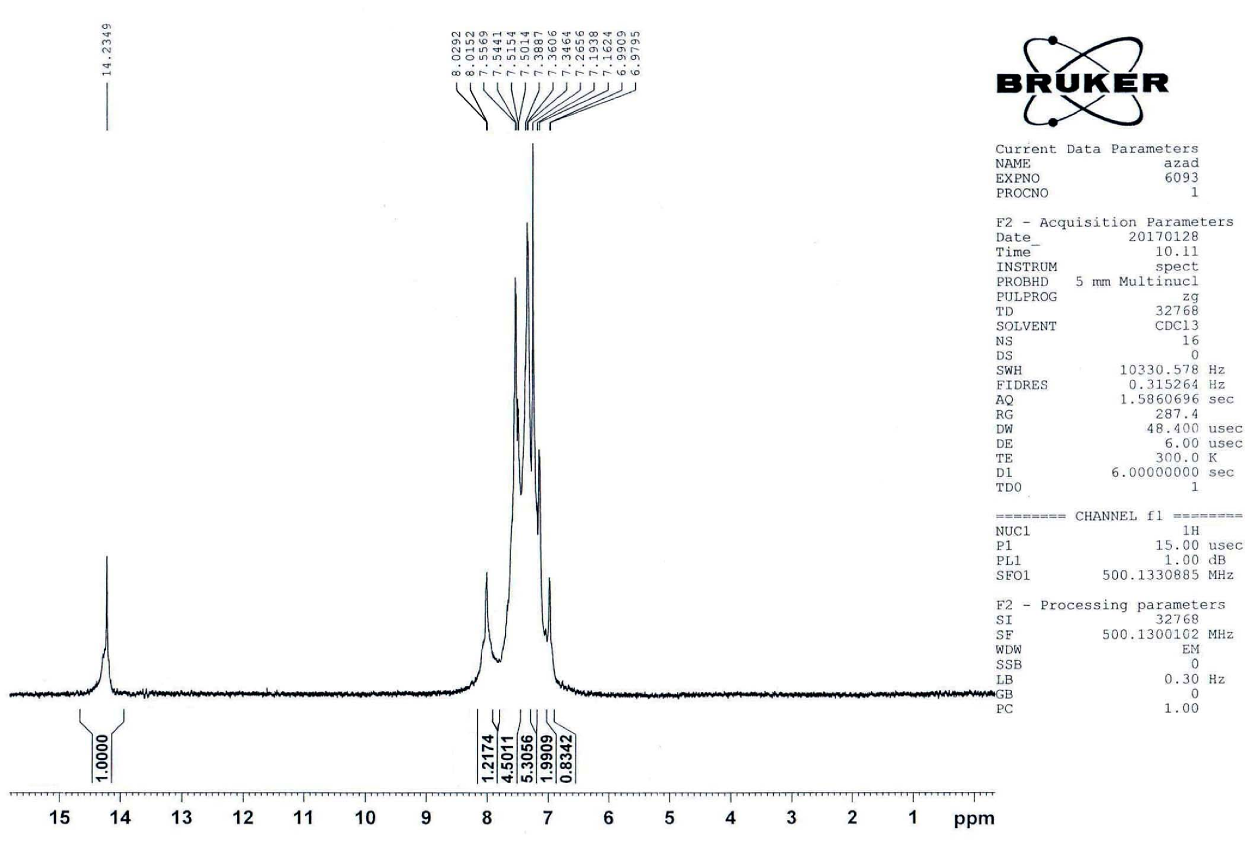
**

**
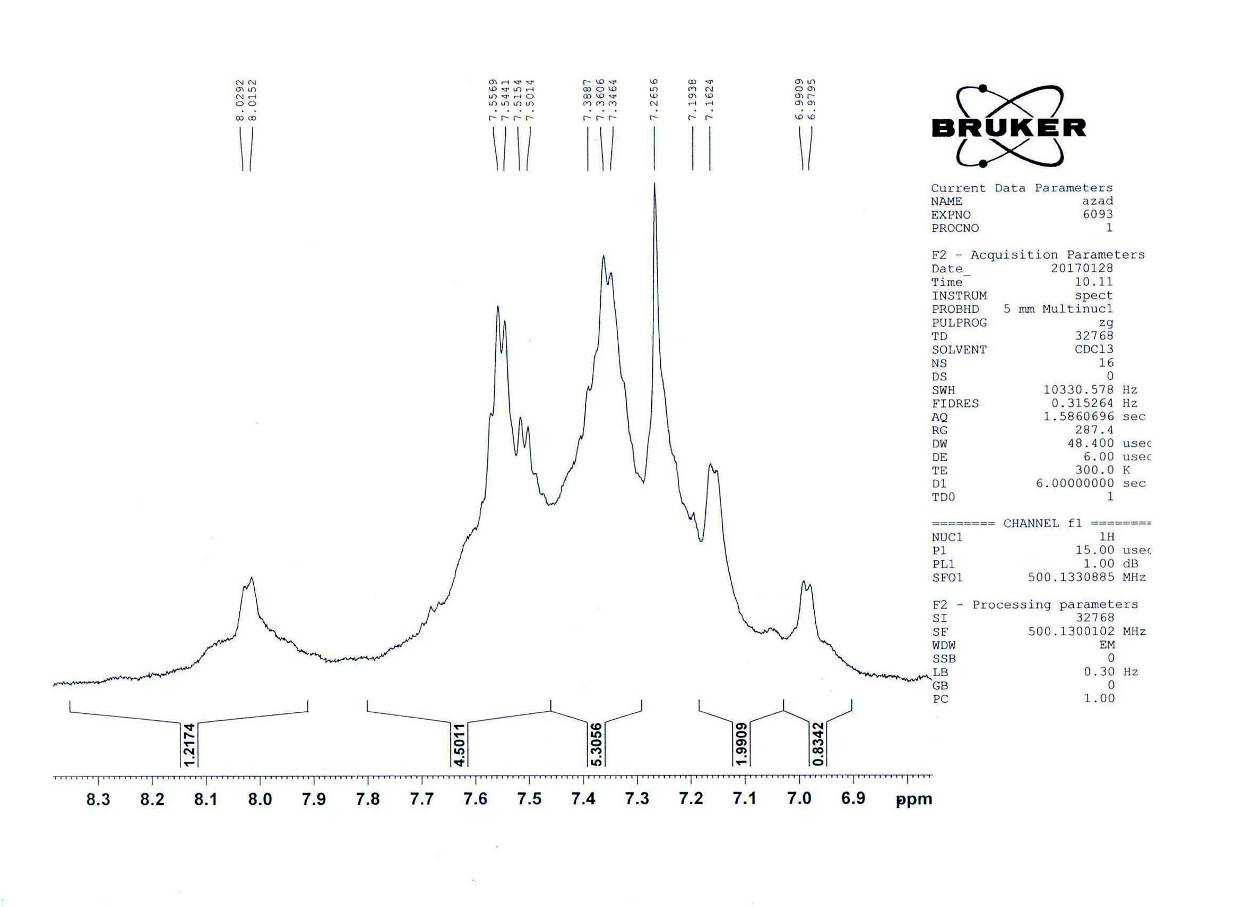
**

**
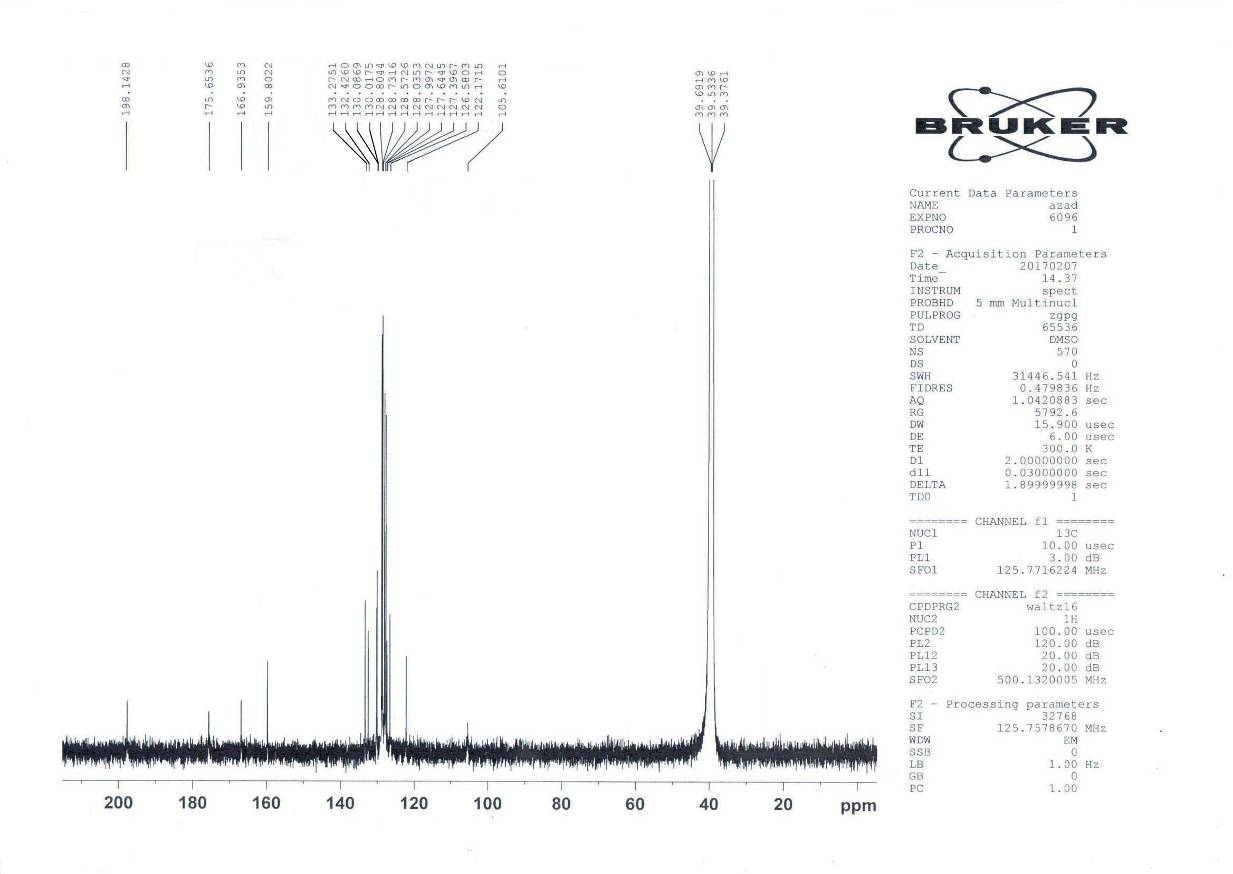
**

**
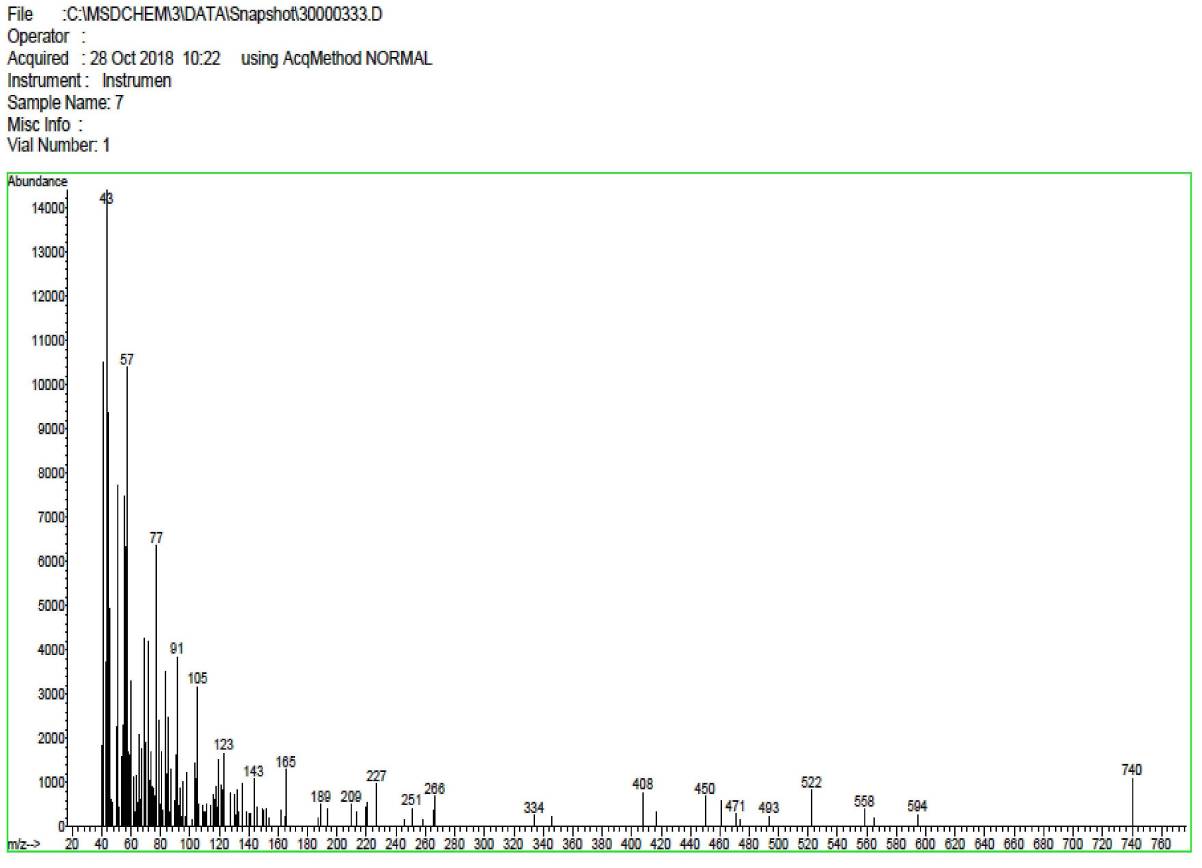
**

**1,3-Bis(4-benzoyl-2-oxo-5-phenylimino-2,5-dihydrothiophene-3-ylamino)benzene (8)**


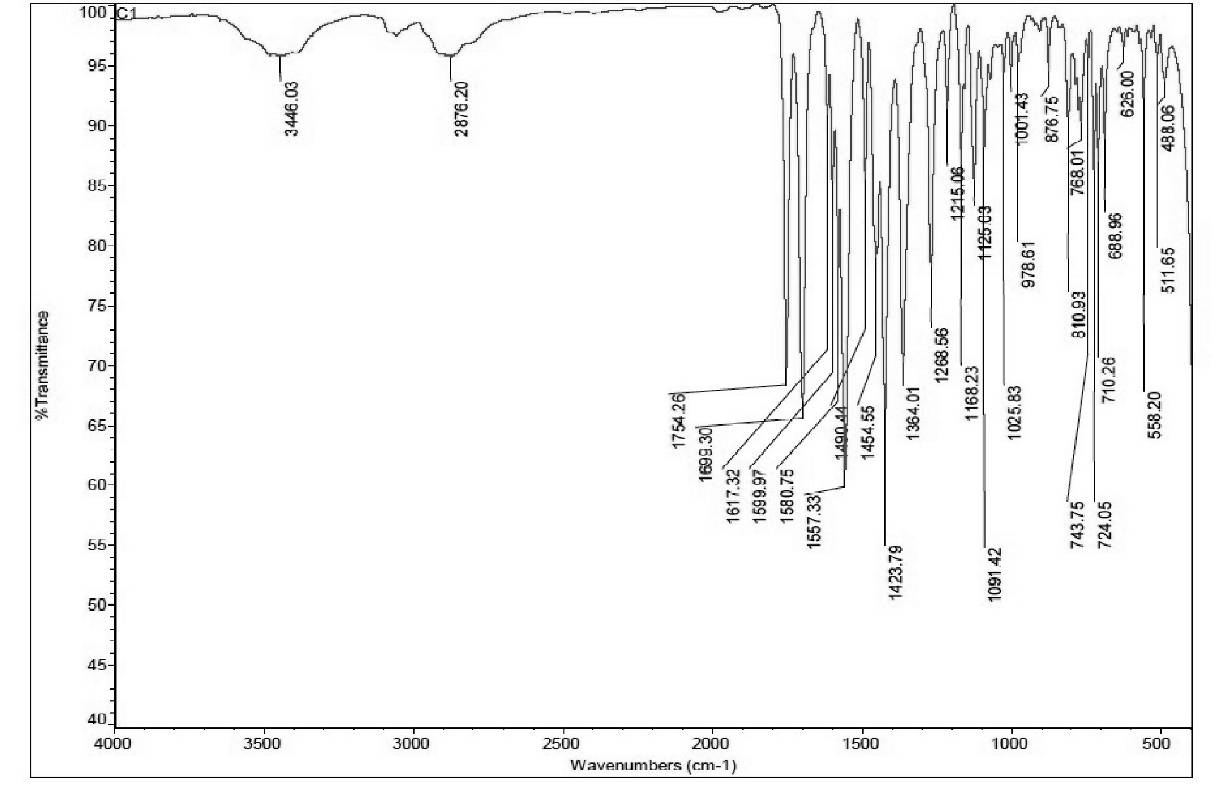


**
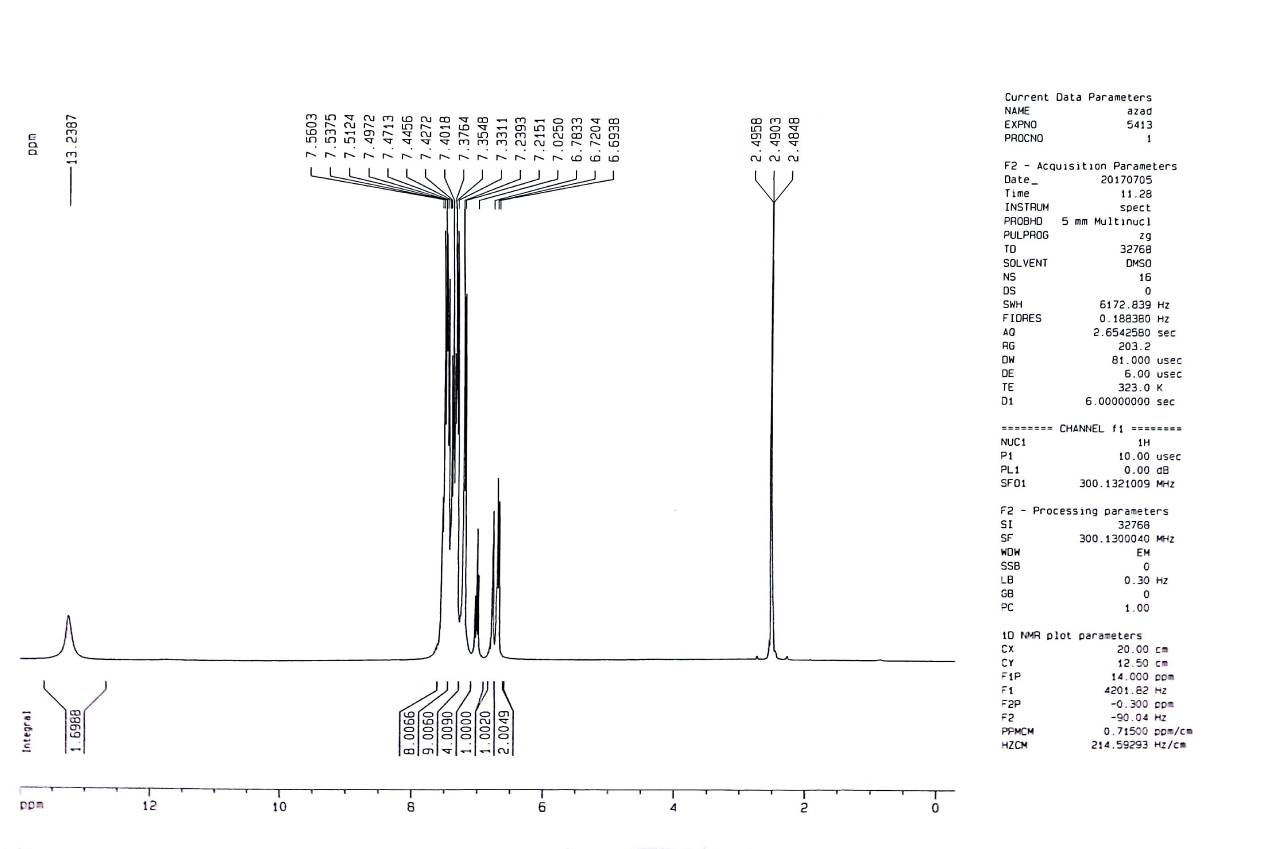
**

**
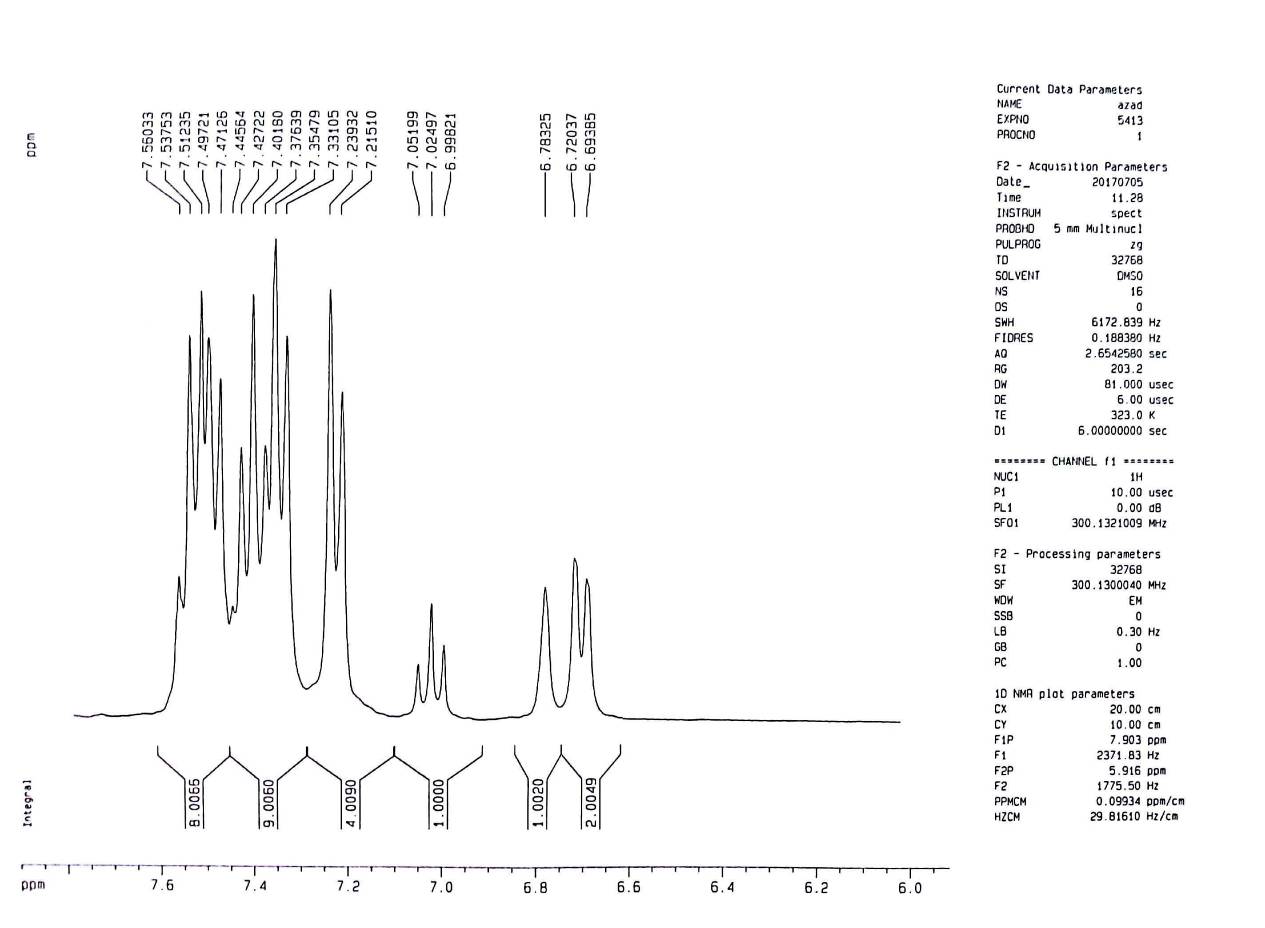
**

**
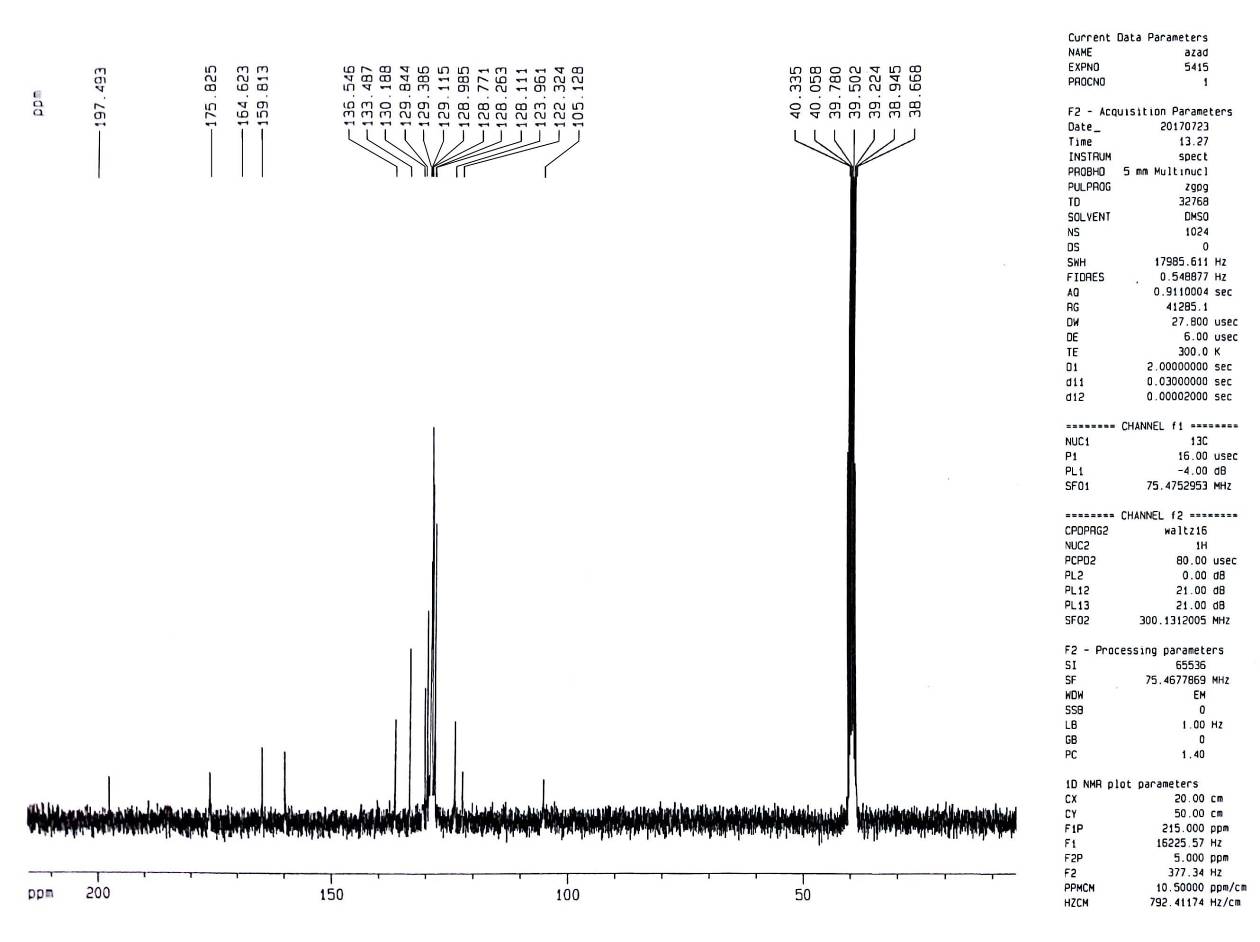
**

**
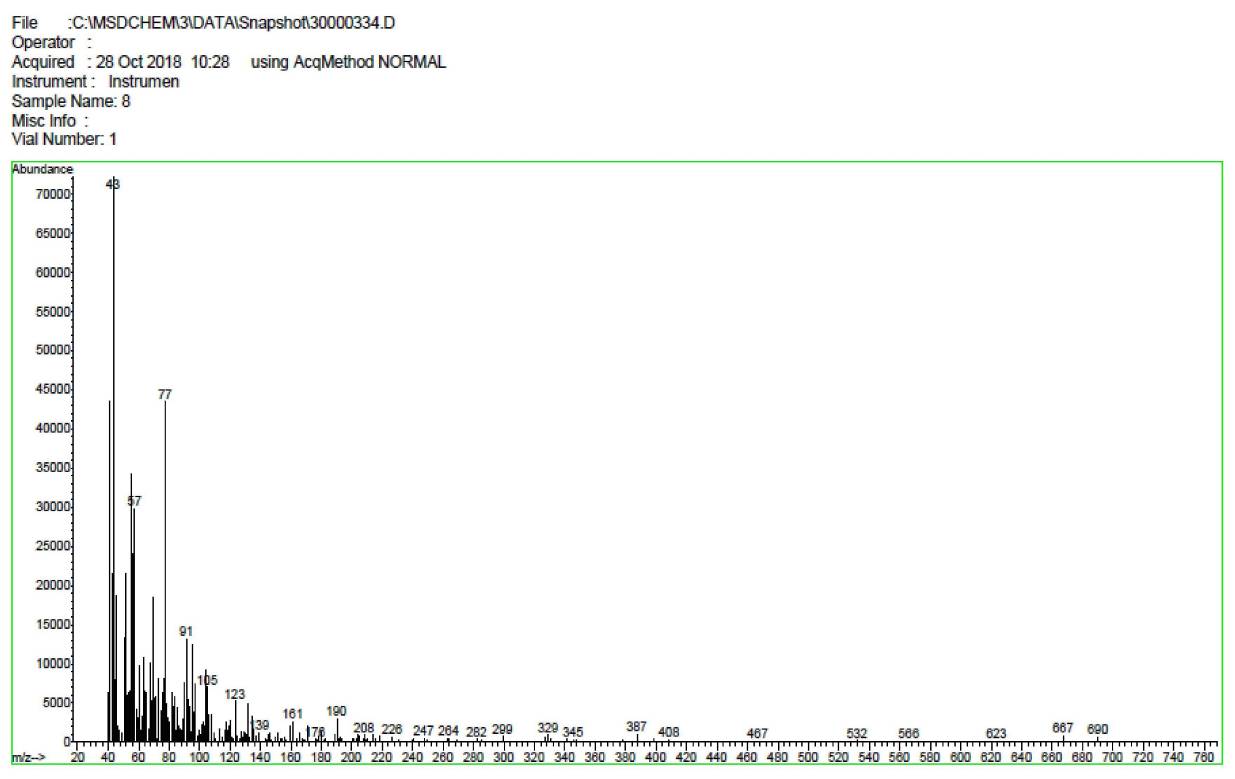
**
